# Supplementary material
Source: publisher figshare collection journal article supplement (https://acs.figshare.com/ndownloader/files/32630018)
Supplement: Supplementary file 1 [file 32630018]

## Supporting Information

# Iron Complexes of a Proton-Responsive SCS Pincer Ligand with a Sensitive Electronic Structure

*Kazimer L. Skubi,<sup>†,a</sup> Reagan X. Hooper,<sup>†,a</sup> Brandon Q. Mercado,<sup>a</sup> Melissa M. Bollmeyer,<sup>b</sup>*

*Samantha N. MacMillan,<sup>b</sup> Kyle M. Lancaster,<sup>b</sup> Patrick L. Holland<sup>\*,a</sup>*

<sup>a</sup> Department of Chemistry, Yale University, New Haven, Connecticut 06511.

<sup>b</sup> Department of Chemistry and Chemical Biology, Cornell University, Ithaca, New York 14853.

<sup>†</sup> These authors contributed equally, and should be considered co-first authors.

\*Corresponding author email: [patrick.holland@yale.edu](mailto:patrick.holland@yale.edu)

## Contents

|                                           |      |
|-------------------------------------------|------|
| Reagent Preparation and Handling          | S2   |
| Product Characterization and Spectroscopy | S2   |
| Synthetic Procedures                      | S3   |
| NMR Spectra                               | S16  |
| UV-Visible Absorption Spectra             | S27  |
| IR Spectra                                | S33  |
| Mössbauer Spectra                         | S39  |
| Cyclic Voltammograms                      | S45  |
| SQUID Magnetometry                        | S48  |
| X-Ray Crystallographic Data               | S50  |
| Additional Experiments                    | S70  |
| Computations                              | S75  |
| References                                | S105 |

## Reagent Preparation and Handling

Unless otherwise noted, manipulations were carried out in N<sub>2</sub>-filled MBraun or Vigor gloveboxes with < 1 ppm O<sub>2</sub> or on a Schlenk line with an N<sub>2</sub> atmosphere at ambient temperature. Dry protonated and deuterated solvents were stored over 4 Å molecular sieves under N<sub>2</sub>. Protonated solvents were dried on Q5 columns maintained under argon. C<sub>6</sub>D<sub>6</sub> was degassed and dried over activated alumina prior to storage. THF-*d*<sub>8</sub> was degassed, dried with potassium benzophenone ketyl, then vacuum transferred. Glassware was either flame-dried or dried overnight in a 150 °C oven.

Me<sub>3</sub>NH•BPh<sub>4</sub>,<sup>1</sup> Fe(PMe<sub>3</sub>)<sub>4</sub>,<sup>2</sup> and 2,2'',4,4'',6,6''-hexamethyl-[1,1':3',1''-terphenyl]-2'-thiol<sup>3</sup> (ArSH) were prepared according to literature procedures. **Caution:** PMe<sub>3</sub> may ignite upon contact with air. ArSH was deprotonated in THF using stoichiometric KN(TMS)<sub>2</sub> then concentrated under reduced pressure to a solid and washed with Et<sub>2</sub>O to obtain potassium 2,2'',4,4'',6,6''-hexamethyl-[1,1':3',1''-terphenyl]-2'-thiolate (ArSK). Commercial 18-crown-6 was dissolved in Et<sub>2</sub>O and dried over a layer of 4 Å molecular sieves for at least 24 hours, then filtered through a Celite plug and crystallized from Et<sub>2</sub>O at -40 °C. KHMDS was crystallized from toluene at -40 °C. Commercial Et<sub>3</sub>N was distilled from CaH<sub>2</sub> under N<sub>2</sub>. Commercial 2,6-diisopropylaniline was distilled from CaH<sub>2</sub> under reduced pressure. Commercial SOCl<sub>2</sub> was distilled under N<sub>2</sub>. KC<sub>8</sub> was synthesized by vigorous stirring of a potassium melt with eight equivalents of graphite under argon at 140 °C for 45 minutes. **Caution:** KC<sub>8</sub> may ignite upon contact with air. All other reagents were purchased from commercial sources and used without further purification.

## Product Characterization and Spectroscopy

<sup>1</sup>H, <sup>13</sup>C{<sup>1</sup>H}, and <sup>31</sup>P{<sup>1</sup>H} NMR spectra were obtained using a DD2 400, 500, 600, or 800 MHz spectrometer at room temperature. <sup>1</sup>H spectra were internally referenced to the residual protio-solvent peak in CDCl<sub>3</sub>, C<sub>6</sub>D<sub>6</sub>, or THF-*d*<sub>8</sub>. <sup>13</sup>C{<sup>1</sup>H} spectra were internally referenced to CDCl<sub>3</sub> (77.16 ppm), DMSO-*d*<sub>6</sub> (39.52 ppm), or THF-*d*<sub>8</sub> (67.21 and 25.31 ppm).<sup>4</sup> <sup>31</sup>P{<sup>1</sup>H} spectra were absolute referenced to the corresponding <sup>1</sup>H spectra using the method described by Harris, *et al.*<sup>5,6</sup> For diamagnetic compounds, multiplicities are defined using the following abbreviations: s (singlet), d (doublet), t (triplet), q (quartet), p (pentet), sext (sextet), sept (septet), br. (broad), app. (apparent), virt. (virtual). For paramagnetic compounds, all peaks are singlets due to broadening unless otherwise noted. Paramagnetic broadening, especially in combination with dynamic processes such as rotations, can prevent accurate baseline correction and lead to lower-than-expected peak integral values. In some cases, broadening may be so extreme that the resonance is not observed. Overlapping peaks were deconvoluted using the generalized Lorentzian line fitting function in MestReNova.

Mössbauer spectra were recorded on a SEE Co. MS4 spectrometer at zero field and 80 K. Isomer shifts were referenced to α-<sup>57</sup>Fe foil at 298 K. Data were fitted using WMoss.

UV-visible spectra were recorded on a Cary 60 spectrophotometer using Kontes-valve sealed cuvettes with 1 mm or 2 mm path lengths.

IR data were collected in an N<sub>2</sub>-filled glovebox using a Bruker ALPHA spectrometer with a platinum ATR module.

Continuous-wave X-Band EPR spectra were recorded in perpendicular mode using a Bruker EleXsys EPR Spectrometer equipped with an ER 049X microwave bridge. The spectra were simulated using EasySpin.<sup>7</sup>

SQUID magnetometry data were collected using a Quantum Design MPMS 3 magnetometer located in the Yale Engineering and Applied Science Center. The samples were prepared by placing crushed solids in a gelatin capsule, secured with eicosane, and placed in a plastic straw sample holder.

Cyclic voltammetry was carried out with a CHI 660E potentiostat inside a nitrogen-filled glovebox using a glassy carbon working electrode, Pt wire counter, and Ag wire pseudo-reference. An electrolytic solution of 0.3 M  $[N^+Bu_4][PF_6^-]$  in THF was used in all measurements, and an internal reference of either ferrocene or decamethylferrocene<sup>8</sup> was included after initial data collection on the reference-free sample.

Elemental analysis was performed by the CENTC Elemental Analysis Facility at the University of Rochester on a PerkinElmer 2400 Series II Analyzer, funded by NSF CHE-0650456. Air-sensitive compounds were handled in VAC Atmospheres gloveboxes. Residual solvents in EA samples were identified by  $^1H$  NMR spectroscopy.

Density functional theory calculations were carried out using ORCA version 4.2.1 on the Yale high performance computing cluster.

## Synthetic Procedures

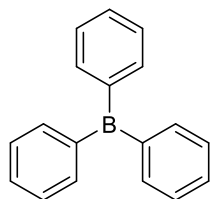

**Triphenylborane (BPh<sub>3</sub>):** Prepared according to a modified literature procedure.<sup>1</sup> In air, a 250 mL round-bottomed flask was charged with trimethylammonium tetraphenylborate<sup>1</sup> (15.6 g, 41.1 mmol) and a stir bar. A distillation head was attached to the top of the flask, the receiving vessel was submerged in a dry ice/acetone bath, and the setup was placed under an N<sub>2</sub> atmosphere. The solid powder was stirred vigorously while heating to 200 °C, at which point the solids melted and the byproducts began to distill. A heat gun was used to melt material near the neck of the flask and in the joints. After 15 minutes, no further material appeared to distill, and the solution was cooled to room temperature, during which time it resolidified. The solids were dried under high vacuum. We observed that the crude solid had a residual odor of amine, which could be removed by dissolving the solid in dry toluene (125 mL, added by cannula), then reconcentrating the mixture under vacuum. The solid residue was then brought into an N<sub>2</sub> filled glovebox, dissolved in toluene (5 x 25 mL portions), and filtered through Celite on a frit. The pale yellow filtrate was concentrated until just saturated (ca. 90 mL), then cooled to -40 °C for 5 hours. The resulting crystalline powder was isolated by decanting the supernatant, washing with pentane (2 x 10 mL), and drying under high vacuum. Two additional crops were collected using the same crystallization procedure to yield 8.37 g (84% yield) of the title compound as a white powder. Spectroscopic data were consistent with the literature.<sup>1</sup>

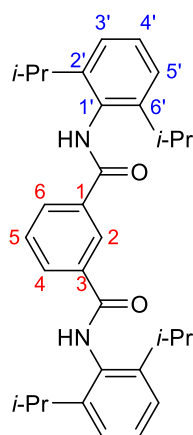

***N*<sup>1</sup>,*N*<sup>3</sup>-bis(2,6-diisopropylphenyl)isophthalamide (Dipp-OCO):** Prepared according to a modified literature procedure.<sup>9</sup>

**Step 1:** A 100 mL round-bottom flask equipped with a reflux condenser was charged with isophthalic acid (24.93 g, 150 mmol), thionyl chloride (33 mL, 452 mmol, 3.0 equiv), and DMF (2 mL), and placed under an N<sub>2</sub> atmosphere. The heterogeneous suspension was heated to 75 °C, and evolved gas was vented through a needle into an aqueous NaHCO<sub>3</sub> solution. After 45 min, gas evolution had ceased and the solution had become homogeneous. The mixture was then cooled to room temperature, the reflux condenser was replaced with a short-path distillation head, and all remaining volatile materials were vacuum distilled (40 mTorr, 85 °C) into a liquid nitrogen-cooled receiving flask.

**Step 2:** A 1 L round-bottomed flask was charged with CH<sub>2</sub>Cl<sub>2</sub> (450 mL), 2,6-diisopropyl aniline (67 mL, 355 mmol, 2.4 equiv), and triethylamine (52 mL, 373 mmol, 2.5 equiv), then cooled to 0 °C. While stirring under N<sub>2</sub>, a solution of the crude acid chloride in CH<sub>2</sub>Cl<sub>2</sub> (50 mL + 2 x 50 mL rinses) was added *slowly* (**Caution:** highly exothermic). The flask headspace was vented with a needle for several minutes, then the mixture was gradually warmed to room temperature and stirred overnight. Following this period, the mixture was concentrated by rotary evaporation to a tan semisolid, then triturated\* with room temperature MeCN (3 x 250 mL) to remove the aniline, followed by 1M aq. HCl (3 x 250 mL) to remove Et<sub>3</sub>N•HCl. The solids were washed with one additional 250 mL portion of MeCN, then dried under high vacuum to provide **Dipp-OCO** as 64.37 g white powder (89% yield). This powder was carried on to the synthesis of **1** without further purification.

\*On smaller-scales, the crude material could be purified by extracting into CH<sub>2</sub>Cl<sub>2</sub>, followed by washing with 1M HCl, 1M NaOH, and brine. However, on large scale, the poor solubility of **Dipp-OCO** in CH<sub>2</sub>Cl<sub>2</sub> necessitated an excessive amount of solvent for the aqueous extraction. Thus, we instead used the trituration procedure described above.

**<sup>1</sup>H NMR** (600 MHz, CDCl<sub>3</sub>) δ 8.52 (t, *J* = 1.8 Hz, 1H, backbone-H2), 8.12 (dd, *J* = 7.8, 1.8 Hz, 2H, H4/6), 7.63 (t, *J* = 7.7 Hz, 1H, H5), 7.54 (br. s, 2H, NH), 7.36 (t, *J* = 7.7 Hz, 2H, H4'), 7.24 (d, *J* = 7.7 Hz, 4H, H3'/5'), 3.15 (sept, *J* = 6.9 Hz, 4H, *i*Pr-CH), 1.24 (d, *J* = 6.9 Hz, 24H, *i*Pr-CH<sub>3</sub>) ppm.

**<sup>13</sup>C{<sup>1</sup>H} NMR** (151 MHz, CDCl<sub>3</sub>) δ 166.19, 146.48, 135.26, 130.87, 130.49, 129.56, 128.87, 126.22, 123.80, 29.09, 23.86 (br. s) ppm.

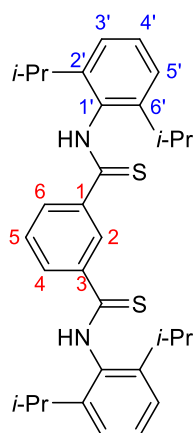

***N*<sup>1</sup>,*N*<sup>3</sup>-bis(2,6-diisopropylphenyl)benzene-1,3-bis(carbothioamide) (**1**, **L** = triply deprotonated **1** in further naming schemes):** In air, a 500 mL round-bottomed flask equipped with a reflux condenser was charged with **Dipp-OCO** (5.35 g, 11.0 mmol), toluene (220 mL) and a stir bar. Phosphorus pentasulfide (7.34 g, 33.0 mmol, 3.0 equiv) was added in a single portion and the heterogeneous mixture was heated at 100 °C for 16 hours. The reaction was then cooled to room temperature and concentrated by rotary evaporation to a semisolid. The crude mixture was diluted with H<sub>2</sub>O (200 mL) and extracted into EtOAc (4 x 200 mL). The combined organic layers were washed with 1M HCl (200 mL), sat. aq. NaHCO<sub>3</sub> (200 mL), dried over Na<sub>2</sub>SO<sub>4</sub>, filtered, and concentrated to an orange foam. We note that in subsequent preparations of this



compound, we found that washing the organic layer with only water was sufficient. This material was eluted through a short pad of silica gel using EtOAc:hexanes (20:80), concentrated, and reconcentrated several times from Et<sub>2</sub>O and hexanes. The resulting product was crystallized by dissolving in boiling Et<sub>2</sub>O (100 mL), cooling to room temperature, layering hexanes (100 mL) and cooling at -25 °C overnight. The resulting yellow block-like crystals were isolated by suction filtration on a frit, rinsed with cold hexanes (3 x 10 mL), and dried under high vacuum to afford **1**·Et<sub>2</sub>O in 5.09 g (78% yield). Under these conditions, the product appears to co-crystallize with a small amount of unknown aromatic impurity and 1 equiv Et<sub>2</sub>O, the latter of which can be removed by subjecting the solid to high vacuum for at least 12 hours. The impurity does not adversely affect purification after the subsequent metalation of **1**.

**<sup>1</sup>H NMR** (600 MHz, CDCl<sub>3</sub>): δ 8.84 (s, 2H, NH), 8.47 (t, *J* = 1.9 Hz, 1H, H2), 8.07 (dd, *J* = 7.8, 1.9 Hz, 2H, H4/6), 7.55 (t, *J* = 7.8 Hz, 1H, H5), 7.43 (t, *J* = 7.8 Hz, 2H, H4'), 7.29 (d, *J* = 7.8 Hz, 4H, H3'/5'), 3.09 (sept, *J* = 6.8 Hz, 4H, *i*Pr-CH), 1.30 (d, *J* = 6.8 Hz, 12H, *i*Pr-CH<sub>3</sub>), 1.24 (d, *J* = 6.9 Hz, 12H, *i*Pr-CH<sub>3</sub>) ppm.

**<sup>13</sup>C{<sup>1</sup>H} NMR** (151 MHz, CDCl<sub>3</sub>): δ 199.86, 145.88, 142.20, 133.78, 129.66, 129.42, 129.32, 125.02, 124.21, 29.13, 24.69, 23.44 ppm.

**UV-vis** (THF): 291 nm (ε = 11,900 cm<sup>-1</sup> M<sup>-1</sup>), 415 nm (320 cm<sup>-1</sup> M<sup>-1</sup>).

**FT-IR** (solid, cm<sup>-1</sup>): 3199 (m), 3144 (m), 3136 (m), 3069 (m), 3034 (w), 2959 (m), 2926 (m), 2865 (m), 2806 (w), 1493 (m), 1468 (m), 1423 (m), 1382 (m), 1360 (m), 1342 (m), 1329 (m), 1272 (m), 1256 (m), 1201 (m), 1187 (m), 1105 (m), 1085 (w), 1056 (m), 1046 (m), 1024 (m), 991 (m), 936 (m), 924 (w), 909 (m), 891 (m), 826 (w), 797 (m), 769 (m), 744 (m), 730 (m), 714 (m), 683 (m), 634 (m), 587 (m), 569 (m), 563 (m), 557 (m), 536 (m), 504 (m), 465 (w), 449 (w), 432 (w), 412 (m), 402 (m).

**Elem. Anal.**: We could not obtain satisfactory elemental analysis of this compound due to co-crystallization of impurity.

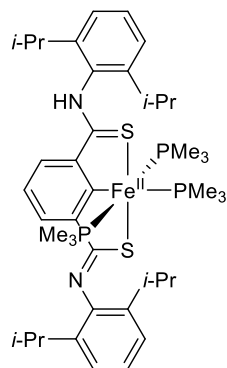

**HLFe<sup>II</sup>(PMe<sub>3</sub>)<sub>3</sub> (**2**)**: A 50 mL bomb flask was charged with Fe(PMe<sub>3</sub>)<sub>4</sub> (107.6 mg, 0.299 mmol, 1.2 equiv) in 4 mL Et<sub>2</sub>O. In a separate vial, a slurry of **1** (129.8 mg, 0.251 mmol) was made using 6 mL Et<sub>2</sub>O, and this slurry was transferred to the flask of stirring Fe(PMe<sub>3</sub>)<sub>4</sub>. After four hours, the reaction mixture was concentrated under reduced pressure to a dark green powder which was rinsed four times with 2 mL pentane, passed through a Celite plug, and eluted with 25 mL Et<sub>2</sub>O. After removal of Et<sub>2</sub>O under reduced pressure, 192.3 mg dark green powder remained (96% yield).

**<sup>1</sup>H NMR** (400 MHz, THF-*d*<sub>8</sub>): δ 9.84 (s, 1H, NH), 8.09 (d, *J* = 7.3 Hz, 1H, H4 or H6), 7.97 (d, *J* = 7.7 Hz, 1H, H4 or H6), 7.34–7.21 (m, 3H, H3'/4'/5' or H3''/4''/5'') (inequivalent, second order), 7.13 (app. t, *J* = 7.5 Hz, 1H, H5), 6.97 (d, *J* = 7.6 Hz, 2H, H3'/5' or H3''/5''), 6.79 (t, *J* = 7.6 Hz, 1H, H4' or H4''), 3.18 – 3.09 (m, 4H, *i*Pr-CH (inequivalent, overlapped)), 1.49 (d, <sup>2</sup>*J*<sub>HP</sub> = 5.5 Hz, 9H, equatorial PMe<sub>3</sub>), 1.20 (d, *J* = 6.9 Hz, 6H, *i*Pr-CH<sub>3</sub>), 1.19

(d,  $J = 6.9$  Hz, 6H, *i*Pr-CH<sub>3</sub>), 1.15 (d,  $J = 7.0$  Hz, 6H, *i*Pr-CH<sub>3</sub>), 1.08 (d,  $J = 6.8$  Hz, 6H, *i*Pr-CH<sub>3</sub>), 0.67 (virt. t,  $J = 2.7$  Hz, 18H, axial PMe<sub>3</sub>) ppm.

**<sup>31</sup>P{<sup>1</sup>H} NMR** (162 MHz, THF-*d*<sub>8</sub>): δ 10.99 (A of A<sub>2</sub>B,  $^2J_{PP} = 46.2$  Hz, 2P), 9.82 (B of A<sub>2</sub>B,  $^2J_{PP} = 46.2$  Hz, 1P) ppm.

**UV-Vis** (THF): 286 nm ( $\epsilon = 10,400$  cm<sup>-1</sup> M<sup>-1</sup>), 395 nm ( $\epsilon = 1,600$  cm<sup>-1</sup> M<sup>-1</sup>), 493 nm ( $\epsilon = 2,100$  cm<sup>-1</sup> M<sup>-1</sup>), 633 nm ( $\epsilon = 2,400$  cm<sup>-1</sup> M<sup>-1</sup>).

**FT-IR** (solid, cm<sup>-1</sup>): 3336 (m), 3052 (w), 2961 (m), 2906 (m), 2861 (m), 2802 (w), 1562 (w), 1507 (m), 1493 (w), 1480 (m), 1462 (m), 1431 (m), 1419 (m), 1378 (m), 1356 (m), 1319 (m), 1295 (m), 1274 (m), 1258 (m), 1225 (m), 1187 (m), 1175 (m), 1099 (w), 938 (m), 926 (m), 865 (m), 846 (m), 834 (m), 799 (m), 756 (m), 734 (m), 703 (m), 675 (m), 659 (m), 640 (m), 630 (m), 610 (m), 589 (m), 557 (m), 536 (m), 498 (m), 453 (m), 434 (m), 418 (m).

**Mössbauer** (solid, 80 K): δ = 0.21 mm/s, |Δ*E*<sub>Q</sub>| = 1.25 mm/s, Γ = 0.28 mm/s.

**Elem. Anal.:** We could not obtain satisfactory elemental analysis of this compound.

**Note about the <sup>31</sup>P{<sup>1</sup>H} NMR spectrum of 2:** It is also possible to interpret the <sup>31</sup>P{<sup>1</sup>H} NMR data as three inequivalent signals, which is plausible given the slight inequivalence of the axial phosphines in the crystal structure. A first order analysis of the <sup>31</sup>P{<sup>1</sup>H} NMR data in C<sub>6</sub>D<sub>6</sub> (below) would give δ 11.01 (d,  $J = 51.0$  Hz), 11.00 (d,  $J = 40.1$  Hz), 9.78 (dd,  $J = 51.0, 39.9$  Hz) ppm, which is almost certainly incorrect because it lacks any trans P–P coupling. However, if the two axial phosphines are truly inequivalent but extremely close in chemical shift, this would produce an ABC spin system with  $\nu_{AB} \ll ^2J_{AB}$ , and thus one would expect a second-order pattern. However, simulations of the ABC and A<sub>2</sub>B spin systems in WINDNMR<sup>10</sup> are almost indistinguishable. Furthermore, <sup>31</sup>P spectra using higher field strengths did not clearly differentiate these possibilities.

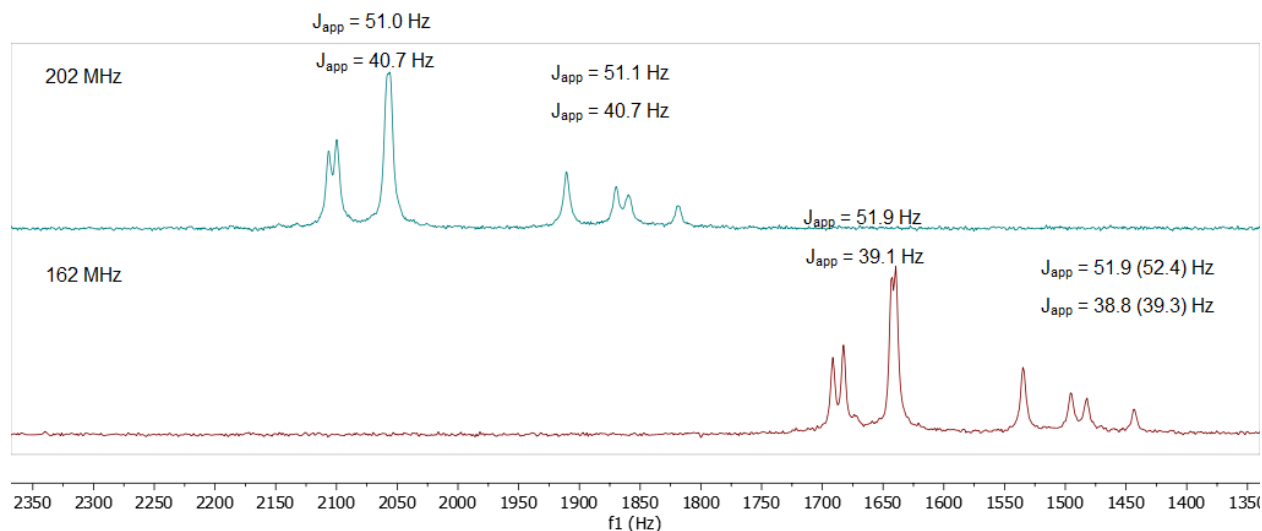

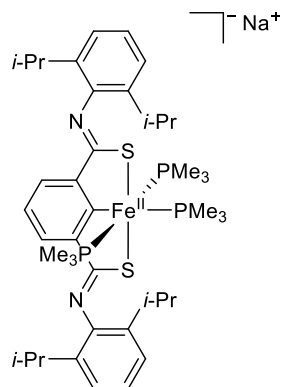

**Na[LFe<sup>II</sup>(PMe<sub>3</sub>)<sub>3</sub>] (3-Na):** In a 20 mL vial, **2** (80.1 mg, 0.100 mmol) was dissolved in 10 mL Et<sub>2</sub>O, giving a dark green solution. NaN(TMS)<sub>2</sub> (18.6 mg, 0.101 mmol, 1.01 equiv) in 10 mL THF was added to stirring **2**, resulting in an immediate color change to dark brown/purple. After 30 minutes, solvents were removed under reduced pressure, and the remaining solids were washed three times with 1 mL pentane to remove HN(TMS)<sub>2</sub>. This afforded 89.6 mg of solid (>100% crude yield). It is possible that sodium-coordinated THF molecules can account for some of the excess mass, as free THF was observed in the NMR spectrum of the solids. The structure of **3-Na** was inferred based on the NMR and IR spectra. Integration relative to a 1,3,5-trimethoxybenzene standard gave an

88% yield of the **3-Na** as drawn. IR and Mössbauer spectra were obtained of the crude solids, and the Mössbauer spectrum showed only one iron species.

**<sup>1</sup>H NMR** (400 MHz, THF-*d*<sub>8</sub>): δ 7.80 (d, *J* = 7.4 Hz, 2H, H4/6), 6.91 (d, *J* = 7.6 Hz, 4H, H3'/5'), 6.80 (app. s, 1H, H5), 6.70 (t, *J* = 6.9 Hz, 2H, H4'), 3.19 (sept, *J* = 6.6 Hz, 4H, *i*Pr CH), 1.41 (s, 9H, equatorial PMe<sub>3</sub>), 1.13 (d, *J* = 7.8 Hz, 12H, *i*Pr CH<sub>3</sub>), 1.05 (d, *J* = 6.8 Hz, 12H, *i*Pr CH<sub>3</sub>), 0.76 (s, 18H, axial PMe<sub>3</sub>) ppm. Assignments are labeled according to the numbering scheme for the ligand **1**.

**<sup>31</sup>P{<sup>1</sup>H} NMR** (162 MHz, THF-*d*<sub>8</sub>): δ 18.16 (A of A<sub>2</sub>B, <sup>2</sup>*J*<sub>PP</sub> = 43.5 Hz, 2P), 15.79 (B of A<sub>2</sub>B, <sup>2</sup>*J*<sub>PP</sub> = 43.5 Hz, 1P) ppm.

**FT-IR** (solid, cm<sup>-1</sup>): 3052 (w), 2955 (m), 2904 (m), 2863 (m), 2800 (w), 1539 (s), 1501 (s), 1464 (m), 1421 (m), 1378 (m), 1366 (m), 1358 (m), 1342 (w), 1319 (m), 1291 (m), 1272 (m), 1256 (m), 1242 (m), 1225 (m), 1185 (m), 1162 (m), 1095 (m), 1046 (m), 1003 (w), 940 (s), 842 (m), 799 (m), 771 (w), 756 (m), 748 (w), 740 (m), 734 (m), 706 (m), 657 (m).

**Mössbauer** (solid, 80K): δ = 0.24 mm/s, |Δ*E*<sub>Q</sub>| = 0.94 mm/s, Γ = 0.30 mm/s.

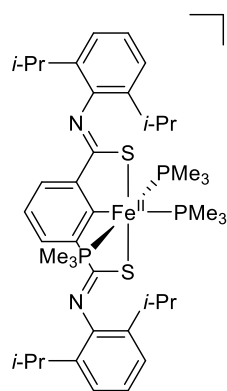

**K[LFe<sup>II</sup>(PMe<sub>3</sub>)<sub>3</sub>] (3-K):** In a 20 mL vial, **4** (83.5 mg, 0.10 mmol) was dissolved in 8 mL THF and cooled to -78 °C. KC<sub>8</sub> (14.8 mg, 0.11 mmol, 1.1 equiv) was added as a slurry in 2 mL THF cooled to -78 °C. The reaction mixture changed from dark green to dark brown in color and was allowed to warm to room temperature while stirring for 1 hour. The reaction mixture was then filtered through a Celite pad, and removal of THF under reduced pressure left 91.7 mg dark brown powder. The structure of **3-K** was inferred based on the NMR spectrum. Integration relative to a NiCp<sub>2</sub> capillary standard gave a 91% yield of **3-K** as drawn. A Mössbauer spectrum of the crude solids was obtained and showed only one iron species.

**<sup>1</sup>H NMR** (400 MHz, THF-*d*<sub>8</sub>): δ 7.83 (app. s, 2H, H4/6), 6.91 (d, *J* = 7.6 Hz, 4H, H3'/5'), 6.80 (app. s, 1H, H5), 6.69 (app. s, 2H, H4'), 3.19 (sept, *J* = 6.7 Hz, 4H, *i*Pr CH), 1.39 (s, 9H, equatorial PMe<sub>3</sub>), 1.13 (d, *J* = 6.9 Hz, 12H, *i*Pr CH<sub>3</sub>), 1.06 (d, *J* = 6.7 Hz, 12H, *i*Pr CH<sub>3</sub>), 0.73 (s, 18H, axial PMe<sub>3</sub>) ppm. Assignments are labeled according to the numbering scheme for the ligand **1**.

$^{31}\text{P}\{^1\text{H}\}$  NMR (162 MHz, THF- $d_8$ ):  $\delta$  18.10 (A of  $\text{A}_2\text{B}$ ,  $^2J_{\text{PP}} = 43.0$  Hz, 2P), 15.87 (B of  $\text{A}_2\text{B}$ ,  $^2J_{\text{PP}} = 43.0$  Hz, 1P) ppm.

**Mössbauer** (solid, 80K):  $\delta = 0.25$  mm/s,  $|\Delta E_{\text{Q}}| = 1.05$  mm/s,  $\Gamma = 0.29$  mm/s.

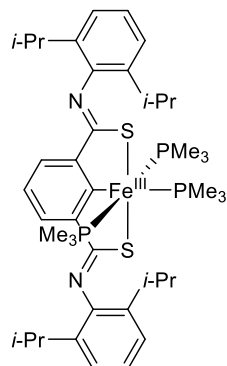

**$\text{LFe}^{\text{III}}(\text{PMe}_3)_3$  (4):**  $\text{Fe}(\text{PMe}_3)_4$  (1.57 g, 4.34 mmol, 1.1 equiv) was added to a 250 mL Schlenk flask, along with  $\text{Et}_2\text{O}$  (100 mL) and a stir bar. The yellow-brown solution was stirred vigorously, and ligand **1** (2.04 g, 3.95 mmol) was added quickly as a solid. Additional  $\text{Et}_2\text{O}$  (20 mL) was used to complete the transfer. The dark green mixture was stirred at room temperature for 2.5 hours, then removed from the glovebox. The solution was sparged with  $\text{N}_2$  for 5 minutes to remove the bulk of the  $\text{PMe}_3$  byproduct (and prevent formation of a large amount of trimethylphosphine oxide in the reaction mixture), then sparged with air for 10 minutes, during which time the color lightened to an olive green. This mixture was then diluted with an additional 50 mL  $\text{Et}_2\text{O}$  and washed with brine (3 x 150 mL) in a separatory funnel to remove any  $\text{O}=\text{PMe}_3$ .

The organic layer was dried over  $\text{Na}_2\text{SO}_4$ , filtered, and concentrated, then dried for several hours at 40 °C and 50 mTorr with a secondary trap of  $\text{P}_2\text{O}_5$ . The solid material was returned to an  $\text{N}_2$  glovebox, dissolved in  $\text{Et}_2\text{O}$  and filtered through a pad of activated alumina, eluting all green material (150 mL total). The eluent was concentrated and dried under vacuum to provide 2.87 g of the final olive-green powder (88% yield, accounting for 0.4 equiv  $\text{Et}_2\text{O}$ ). Crystallization from  $\text{Et}_2\text{O}$  at -40 °C gave crystals for suitable for X-ray diffraction.

**Evans** ( $\text{C}_6\text{D}_6$ , 298 K):  $\mu_{\text{eff}} = 1.6 \mu_{\text{B}}$ .

$^1\text{H}$  NMR (400 MHz,  $\text{C}_6\text{D}_6$ ):  $\delta$  10.8 (4H,  $\text{H}_3'/5'$  or  $i\text{Pr}$  CH), 7.6 (1H, H5), 7.5 (2H), 4.8 (4H,  $\text{H}_3'/5'$  or  $i\text{Pr}$  CH), 2.9 (12H,  $i\text{Pr}$   $\text{CH}_3$ ), 2.6 (12H,  $i\text{Pr}$   $\text{CH}_3$ ), -9.9 (9H, equatorial  $\text{PMe}_3$ ), -13.1 (15H\* axial  $\text{PMe}_3$ ) ppm. Assignments are labeled according to the numbering scheme for the ligand **1**. We did not observe a signal integrating to an additional expected 2H. \*Integration is lower than theoretical value likely because of broadening.

**UV-Vis:** 332 nm ( $\epsilon = 9,800 \text{ cm}^{-1} \text{ M}^{-1}$ ), 389 nm ( $\epsilon = 5,000 \text{ cm}^{-1} \text{ M}^{-1}$ ), 417 nm ( $\epsilon = 5,000 \text{ cm}^{-1} \text{ M}^{-1}$ ), 710 nm ( $\epsilon = 9,000 \text{ cm}^{-1} \text{ M}^{-1}$ ).

**FT-IR** (solid,  $\text{cm}^{-1}$ ): 3052 (w), 2957 (m), 2908 (m), 2863 (m), 2800 (w), 1593 (m), 1566 (s), 1550 (s), 1462 (m), 1429 (m), 1419 (m), 1387 (m), 1358 (m), 1325 (m), 1299 (m), 1278 (m), 1252 (m), 1232 (m), 1181 (m), 1158 (w), 1099 (m), 1058 (w), 1042 (w), 936 (s), 916 (s), 846 (m), 812 (m), 797 (m), 756 (m), 732 (m), 722 (m), 667 (m), 616 (m), 510 (w).

**Mössbauer** (solid, 80 K):  $\delta = 0.16$  mm/s,  $|\Delta E_{\text{Q}}| = 3.45$  mm/s,  $\Gamma_{\text{L}} = 0.57$  mm/s,  $\Gamma_{\text{R}} = 0.32$  mm/s.

**Elem. Anal.:** Anal. Calcd. for  $\text{C}_{41}\text{H}_{64}\text{FeN}_2\text{P}_3\text{S}_2 \cdot 0.4 \text{ C}_4\text{H}_{10}\text{O}$  ( $\text{Et}_2\text{O}$ ): C, 61.84; H, 8.31; N, 3.37. Found: C, 61.94; H, 8.46; N, 3.43.

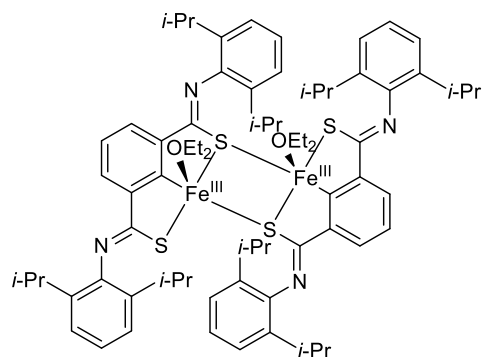

**[LFe<sup>III</sup>(Et<sub>2</sub>O)]<sub>2</sub> (5-Et<sub>2</sub>O):** A 20 mL vial was charged with a stir bar, LFe<sup>III</sup>(PMe<sub>3</sub>)<sub>3</sub>(Et<sub>2</sub>O)<sub>0.4</sub> (**4**) (826 mg, 1.00 mmol, 1.0 equiv), and THF (5 mL). While stirring vigorously, BPh<sub>3</sub> (800 mg, 3.30 mmol, 3.3 equiv) was added in a single portion, resulting in a rapid color change from green to red. After several minutes, the color gradually lightened to orange and considerable precipitation was observed (Me<sub>3</sub>P–BPh<sub>3</sub>). After 2.5 hours, the mixture was filtered through Celite on a frit, rinsing with THF until all orange material eluted. The filtrate was concentrated, dissolved in

minimal THF, re-filtered through a Celite plug and concentrated in vacuo. This process was repeated several times until no further precipitate was observed during filtration. The crude product was then re-concentrated several times from Et<sub>2</sub>O/hexanes (50/50, 3 x 10 mL portions) to exchange the bound solvent with Et<sub>2</sub>O and remove residual THF. The resulting brown solid was crystallized twice from Et<sub>2</sub>O (dissolved in 45 mL Et<sub>2</sub>O, filtered, cooled to –40 °C overnight) to afford 376 mg (58% yield) dark brown needles of **5-Et<sub>2</sub>O**.

**<sup>1</sup>H NMR** (400 MHz, THF-*d*<sub>8</sub>): δ 12.1 (4H, H3'/5'), 6.5 (2H), 3.4 (q, *J* = 7.0 Hz, 4H, O(CH<sub>2</sub>CH<sub>3</sub>)<sub>2</sub>), 2.3 (12H *i*Pr CH<sub>3</sub>), 1.1 (t, *J* = Hz, 6H, O(CH<sub>2</sub>CH<sub>3</sub>)<sub>2</sub>), 0.2 (12H, *i*Pr CH<sub>3</sub>), –74.5 (2H), –81.1 (1H, H5). Assignments are labeled according to the numbering scheme for the ligand **1**. We did not observe another signal integrating to 4H (*i*Pr CH), likely because of broadening. There may be an extremely broad peak centered around 3.3 ppm that corresponds to this resonance. Note that upon dissolution in THF, Mössbauer spectroscopy indicates there is a change in the iron coordination environment (Figure S80), which may be consistent with the dimer breaking up into monomers. This could explain why this NMR spectrum suggests a higher symmetry than the dimeric structure.

**UV-Vis** (THF): 304 nm (ε = 7,600 cm<sup>–1</sup> M<sup>–1</sup>), 353 nm (6,800 cm<sup>–1</sup> M<sup>–1</sup>), 458 nm (4,600 cm<sup>–1</sup> M<sup>–1</sup>).

**FT-IR** (solid, cm<sup>–1</sup>): 3057 (w), 2957 (m), 2930 (m), 2900 (m), 2865 (m), 1613 (m), 1576 (s), 1458 (m), 1448 (m), 1431 (m), 1382 (m), 1358 (m), 1327 (m), 1274 (m), 1252 (m), 1238 (m), 1179 (m), 1107 (w), 1097 (m), 1085 (m), 1036 (m), 991 (m), 909 (m), 814 (m), 795 (m), 775 (m), 756 (m), 720 (m), 620 (m), 504 (w), 469 (w), 416 (w).

**Elem. Anal.:** Anal. Calcd. for C<sub>64</sub>H<sub>74</sub>Fe<sub>2</sub>N<sub>4</sub>S<sub>4</sub> • 2 C<sub>4</sub>H<sub>10</sub>O (Et<sub>2</sub>O): C, 67.17; H, 7.36; N, 4.35. Found: C, 67.36; H, 7.46; N, 4.11.

**Mössbauer** (solid, 80 K): δ = 0.34 mm/s, |Δ*E*<sub>Q</sub>| = 3.91 mm/s, Γ<sub>L</sub> = 0.32 mm/s, Γ<sub>R</sub> = 0.27 mm/s.

**Mössbauer** (frozen THF solution, 80 K): δ = 0.45 mm/s, |Δ*E*<sub>Q</sub>| = 4.26 mm/s, Γ<sub>L</sub> = 0.73 mm/s, Γ<sub>R</sub> = 0.49 mm/s.

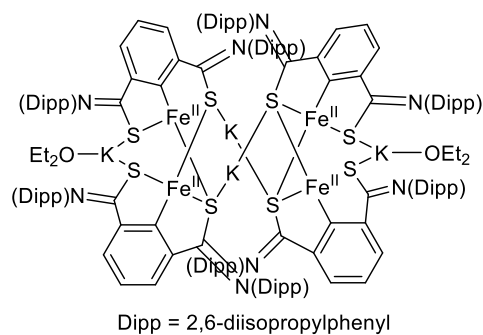

**K<sub>4</sub>[LFe<sup>II</sup>]<sub>4</sub>(Et<sub>2</sub>O)<sub>2</sub> (6):** A 20 mL vial was charged with [LFe<sup>III</sup>(Et<sub>2</sub>O)]<sub>2</sub> (**5-Et<sub>2</sub>O**) (102 mg, 0.079 mmol, 1.0 equiv) was dissolved in 2 mL THF and cooled to −78 °C. While stirring, KC<sub>8</sub> (22.9 mg, 0.169 mmol, 2.1 equiv) was added as a solid. The reaction mixture changed from orange-red to very dark purple upon addition of KC<sub>8</sub>. The reaction was slowly warmed to room temperature over an hour, then the mixture was filtered through a Celite plug. THF was removed under reduced pressure, and the dark solids were dissolved in 1 mL Et<sub>2</sub>O. After filtering, the Et<sub>2</sub>O solution

was placed at −40 °C, and dark square crystals formed within several hours. The crystalline material was dried under vacuum to afford 47 mg (46% yield) of **6** as a dark brown solid.

**<sup>1</sup>H NMR** (400 MHz, THF-*d*<sub>8</sub>): δ 13.9 (2H), 11.1 (1H), 10.2 (1H), 9.3 (1H), 7.7 (1H), 6.8 (3H, *i*Pr CH<sub>3</sub>), 6.2 (1H), 6.1 (1H), 4.8 (3H, *i*Pr CH<sub>3</sub>), 1.3 (2H), 0.8 (2H), 0.4 (2H), −0.8 (3H, *i*Pr CH<sub>3</sub>), −1.6 (3H, *i*Pr CH<sub>3</sub>), −4.3 (3H, *i*Pr CH<sub>3</sub>), −7.8 (1H), −26.1 (1H), −26.7 (1H), −41.2 (1H) ppm. Due to the complexity and broadness of the NMR spectrum, we were not able to assign resonances besides the five tentatively-assigned isopropyl CH<sub>3</sub> groups. Assuming all proton environments are chemically inequivalent (except for protons on the same methyl group), there should be 21 signals excluding Et<sub>2</sub>O; however, only 19 were found. Additional peaks are probably obscured by overlap or broadening.

**UV-Vis** (THF): 465 nm (ε = 4,200 cm<sup>−1</sup> M<sup>−1</sup>), 662 nm (ε = 1,300 cm<sup>−1</sup> M<sup>−1</sup>).

**FT-IR** (solid, cm<sup>−1</sup>): 3057 (w), 2953 (m), 2924 (m), 2861 (m), 2804 (m), 1605 (m), 1568 (s), 1546 (m), 1458 (m), 1425 (m), 1380 (m), 1358 (m), 1323 (m), 1291 (m), 1262 (m), 1232 (m), 1179 (m), 1158 (m), 1144 (m), 1109 (m), 1097 (m), 1075 (m), 1042 (m), 1011 (m), 958 (w), 932 (m), 907 (m), 797 (m), 756 (m), 730 (m), 718 (m), 693 (w), 653 (w), 610 (m), 555 (m), 506 (w), 473 (w).

**Mössbauer** (solid, 80 K): δ = 0.34 mm/s, |ΔE<sub>Q</sub>| = 1.87 mm/s, Γ = 0.33 mm/s.

**Elem. Anal.:** Anal. Calcd. For K<sub>4</sub>C<sub>128</sub>H<sub>148</sub>Fe<sub>4</sub>N<sub>8</sub>S<sub>8</sub> • 2 C<sub>4</sub>H<sub>10</sub>O (Et<sub>2</sub>O): C, 63.24; H, 6.56; N, 4.34. Found: C, 62.98; H, 6.18; N, 4.54.

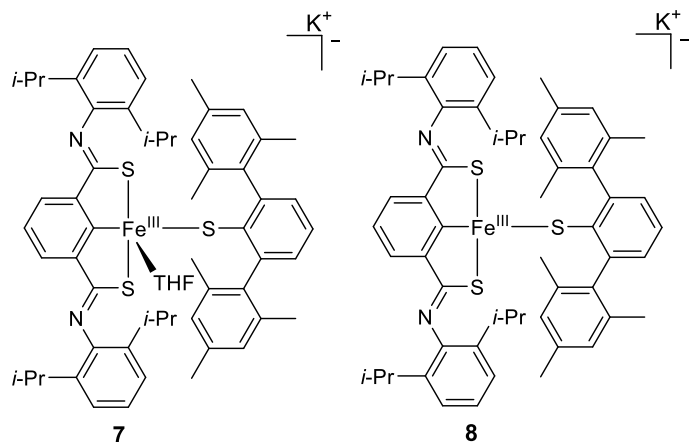

**K[LFe<sup>III</sup>(SAr)(THF)] (7) and K[LFe<sup>III</sup>(SAr)] (8):** A solution of **5-Et<sub>2</sub>O** (10.3 mg, 0.0080 mmol, 1.0 equiv) in 2 mL THF was added to solid ArSK (6.4 mg, 0.017 mmol, 2.1 equiv) in a 20 mL vial while stirring. The solution became slightly darker orange. After two hours, THF was removed under reduced pressure, leaving a dark orange solid. Pentane (2 mL) was added, causing the solution to turn dark brown, and evacuation of pentane left dark brown

solids. The solids were redissolved in pentane (2 mL) and passed through a Celite plug, then dried to provide 14.8 mg solid **8** (97% yield). We were unable to crystallize **7** or **8** without 18-crown-6 (see below). Note that upon dissolution in THF, the color of **8** changes from dark brown to red-orange, indicating that THF-adduct **7** is likely formed.

**Evans** (**7**, THF-*d*<sub>8</sub>, 298 K):  $\mu_{\text{eff}} = 4.0 \pm 0.1 \mu_{\text{B}}$ .

**<sup>1</sup>H NMR** (**7**, 400 MHz, THF-*d*<sub>8</sub>):  $\delta$  15.0 (2H), 12.8 (4H), 6.9 (4H), 6.6 (6H), 3.0 (12H), 2.6 (12H), 1.3 (12H), -2.1 (2H), -45.5 (2H), -63.2 (1H) ppm. We did not observe additional expected signals integrating to 1H or 4H.

**UV-Vis** (**7**, THF): 345 nm ( $\epsilon = 10,400 \text{ cm}^{-1} \text{ M}^{-1}$ ), 465 nm ( $\epsilon = 6,400 \text{ cm}^{-1} \text{ M}^{-1}$ ).

**FT-IR** (solid **8**,  $\text{cm}^{-1}$ ): 3050 (w), 2957 (m), 2922 (m), 2865 (m), 1595 (s), 1574 (s), 1450 (m), 1429 (m), 1380 (m), 1358 (m), 1327 (m), 1274 (m), 1252 (m), 1238 (m), 1181 (m), 1160 (m), 1144 (w), 1109 (m), 1097 (m), 1042 (m), 1013 (m), 918 (m), 852 (m), 797 (m), 756 (m), 742 (m), 716 (m), 699 (m), 659 (w), 622 (m), 593 (m), 510 (m), 471 (m), 418 (m).

**Mössbauer** (solid **8**, 80 K):  $\delta = 0.31 \text{ mm/s}$ ,  $|\Delta E_{\text{Q}}| = 3.88 \text{ mm/s}$ ,  $\Gamma_{\text{L}} = 0.61 \text{ mm/s}$ ,  $\Gamma_{\text{R}} = 0.53 \text{ mm/s}$ .

**Elem. Anal.** (solid **8**): Anal. Calcd. for  $\text{KC}_{56}\text{H}_{62}\text{FeN}_2\text{S}_3 \cdot \text{C}_4\text{H}_8\text{O}$  (THF): C, 70.21; H, 6.87; N, 2.73. Found: C, 69.84; H, 6.59; N, 2.75. This sample was prepared from crushed material that was dried for several hours under vacuum, giving a dark brown solid that is characteristic of the compound with no THF coordinated to iron. Thus, the single THF molecule per iron in the sample is likely coordinated to  $\text{K}^+$  rather than the iron center, as the Fe-THF adduct appears dark orange, not dark brown.

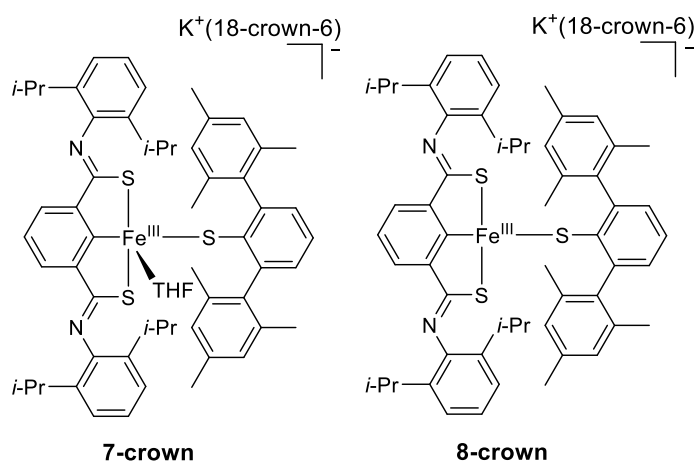

**K(18-crown-6)[LFe<sup>III</sup>(SAr)(THF)] (7-crown) and K(18-crown-6)[LFe<sup>III</sup>(SAr)] (8-crown):** A solution of 18-crown-6 (33.8 mg, 0.128 mmol, 2.1 equiv) was dissolved in 5 mL THF and transferred to solid **5-Et<sub>2</sub>O** (76.8 mg, 0.060 mmol, 1.0 equiv) while stirring. The resulting solution was added to a solution of ArSK (49.1 mg, 0.128 mmol, 2.1 equiv) in 2 mL THF, resulting in an immediate color change from orange to red-brown. After one hour of stirring, the reaction mixture was concentrated to a

sticky brown solid. The solids were washed with hexanes (3 x 3 mL) then extracted into Et<sub>2</sub>O, then toluene (each 3 x 3 mL). Combining extractions into toluene and Et<sub>2</sub>O followed by solvent removal under reduced pressure gave 136.4 mg (93% yield) of dark green solid **8-crown**. Crystals suitable for diffraction were obtained of **8-crown** by crystallization from toluene at -40 °C. Crystallization from THF at ambient temperature gave the Fe-coordinated THF adduct **7-crown**.

**<sup>1</sup>H NMR** (7-crown, 400 MHz, THF-*d*<sub>8</sub>): δ 15.7 (2H), 13.0 (4H), 5.0 (12H), 3.3 (24H, 18-crown-6), 2.9 (12H), 2.5 (12H), −0.7 (2H), −46.7 (2H), −49.9 (1H) ppm. We did not observe additional expected signals integrating to 1H, 4H, or 6H, though there may be an extremely broad feature centered around 4 ppm that overlaps with several other more well-defined peaks.

**UV-Vis** (7-crown, THF): 293 nm (ε = 25,200 cm<sup>−1</sup> M<sup>−1</sup>), 360 nm (ε = 12,600 cm<sup>−1</sup> M<sup>−1</sup>), 405 nm (ε = 10,400 cm<sup>−1</sup> M<sup>−1</sup>), 468 nm (ε = 6,500 cm<sup>−1</sup> M<sup>−1</sup>).

**FT-IR** (solid 8-crown, cm<sup>−1</sup>): 3055 (w), 2955 (m), 2910 (m), 2863 (m), 1595 (m), 1576 (s), 1452 (m), 1431 (m), 1382 (m), 1352 (m), 1327 (m), 1297 (m), 1276 (m), 1248 (m), 1181 (m), 1101 (m), 1060 (m), 1044 (m), 1011 (m), 1001 (m), 954 (m), 920 (m), 869 (m), 858 (w), 842 (m), 814 (m), 795 (m), 759 (m), 742 (m), 724 (m), 695 (m), 591 (m), 575 (m), 559 (w), 514 (m), 477 (m), 467 (m).

**Mössbauer** (solid 8-crown, 80 K): δ = 0.30 mm/s, |ΔE<sub>Q</sub>| = 4.03 mm/s, Γ = 0.41 mm/s.

**Elem. Anal.** (8-crown): Anal. Calcd. for KC<sub>68</sub>H<sub>86</sub>FeN<sub>2</sub>S<sub>3</sub>O<sub>6</sub>: C, 67.02; H, 7.11; N, 2.30. Found: C, 67.06; H, 7.18; N, 2.20.

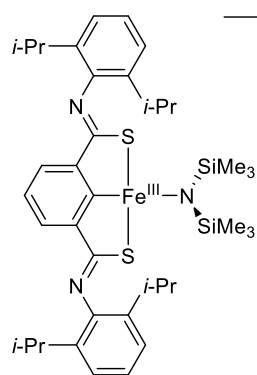

**K[LFe<sup>III</sup>(N(TMS)<sub>2</sub>)] (9):** A 20 mL vial was charged with **5-Et<sub>2</sub>O** (128 mg, 0.099 mmol, 1.0 equiv), THF (2 mL), and a stir bar. While stirring, KHMDS (42 mg, 0.21 mmol, 2.1 equiv) was added as a solution in THF (1 mL + 2 x 0.5 mL rinses). The red-orange mixture was stirred at room temperature for 5 minutes, then concentrated under reduced pressure and reconcentrated from Et<sub>2</sub>O/hexanes to give an orange solid. The crude product was triturated with 3 x 3 mL portions of hexanes and toluene, discarding these extracts. The remaining orange solid was then collected into a separate flask by dissolving in Et<sub>2</sub>O and eluting through a plug of Celite on a frit, followed by concentrating under vacuum to yield 133 mg (87% yield) of bright orange powder. X-ray quality crystals were obtained from vapor diffusion of pentane into an Et<sub>2</sub>O solution at −40 °C.

**Evans** (THF-*d*<sub>8</sub>, 298 K): μ<sub>eff</sub> = 4.1 ± 0.1 μ<sub>B</sub>.

**<sup>1</sup>H NMR** (400 MHz, THF-*d*<sub>8</sub>): δ 19.1 (4H, H3'/5' or *i*Pr CH), 13.5 (4H, H3'/5' or *i*Pr CH), 11.0 (2H, H4' or H4/6), 4.9 (12H, *i*Pr CH<sub>3</sub>), 4.8 (12H, *i*Pr CH<sub>3</sub>), −21.9 (2H, H4' or H4/6), −22.6 (15H\*, Si(CH<sub>3</sub>)<sub>3</sub>), −67.9 (1H, H5) ppm. Assignments are labeled according to the numbering scheme for the ligand **1**. \*Broadening likely leads to a lower integration than the theoretical value.

**FT-IR** (solid, cm<sup>−1</sup>): 3050 (w), 2955 (m), 2924 (m), 2891 (m), 2865 (m), 1593 (m), 1570 (s), 1542 (m), 1460 (m), 1427 (m), 1395 (m), 1382 (m), 1360 (m), 1325 (m), 1301 (m), 1278 (m), 1242 (m), 1225 (m), 1185 (m), 1099 (m), 1058 (m), 958 (s), 934 (m), 856 (m), 830 (m), 799 (s), 769 (s), 740 (m), 712 (s), 669 (m), 626 (m), 618 (m), 518 (m), 479 (m), 469 (m), 428 (m).

**UV-Vis** (THF): 287 nm (ε = 25,200 cm<sup>−1</sup> M<sup>−1</sup>), 358 nm (ε = 7,600 cm<sup>−1</sup> M<sup>−1</sup>), 417 nm (ε = 6,200 cm<sup>−1</sup> M<sup>−1</sup>).



**Mössbauer** (solid, 80 K):  $\delta = 0.18$  mm/s,  $|\Delta E_Q| = 0.93$  mm/s,  $\Gamma_L = 0.30$  mm/s,  $\Gamma_R = 0.33$  mm/s.

**Elem. Anal.:** We were unable to obtain satisfactory elemental analysis on this compound, likely due to its apparent room-temperature decomposition even as a solid (see Figure S17).

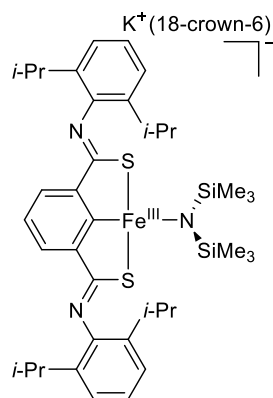

**K(18-crown-6)[LFe<sup>III</sup>(N(TMS)<sub>2</sub>)] (9-crown):** 18-crown-6 (4.8 mg, 0.018 mmol, 2.4 equiv) was dissolved in 0.5 mL THF and transferred to solid **5-Et<sub>2</sub>O** (9.7 mg, 0.075 mmol, 1.0 equiv). This solution was then transferred to solid KN(TMS)<sub>2</sub> (3.5 mg, 0.018 mmol, 2.4 equiv), and the resulting reaction mixture stirred vigorously for 10 minutes. The crude mixture was concentrated to an orange semisolid material, which was washed with Et<sub>2</sub>O over a Celite plug then eluted with THF. Removal of THF under reduced pressure gave 15.5 mg orange powder, which was a yield of 94% when integrated with respect to a NiCp<sub>2</sub> capillary standard; some KN(TMS)<sub>2</sub> remained. Analytically-pure crystalline material for X-ray diffraction was obtained from vapor diffusion of pentane into an Et<sub>2</sub>O solution at  $-40$  °C.

**<sup>1</sup>H NMR** (400 MHz, THF-*d*<sub>8</sub>):  $\delta$  19.0 (4H, H3'/5' or *i*Pr CH), 13.4 (4H, H3'/5' or *i*Pr CH), 10.9 (2H, H4'), 4.8 (12H, *i*Pr CH<sub>3</sub>), 4.7 (10H\*, *i*Pr CH<sub>3</sub>), 3.2 (24H, 18-crown-6),  $-21.9$  (2H, H4/6),  $-22.6$  (16H\*, Si(CH<sub>3</sub>)<sub>3</sub>),  $-68.0$  (1H, H5) ppm. Assignments are labeled according to the numbering scheme for the ligand **1**. \*Broadening likely leads to a lower integration than the theoretical value.

**UV-Vis:** 285 nm ( $\epsilon = 23,000$  cm<sup>-1</sup> M<sup>-1</sup>), 408 nm ( $\epsilon = 7,000$  cm<sup>-1</sup> M<sup>-1</sup>).

**FT-IR** (solid, cm<sup>-1</sup>): 3052 (w), 2953 (m), 2895 (m), 2863 (m), 1564 (m), 1454 (m), 1429 (m), 1352 (m), 1325 (w), 1274 (m), 1248 (m), 1238 (m), 1183 (m), 1101 (m), 1058 (m), 1044 (m), 1005 (w), 960 (m), 932 (m), 832 (m), 810 (m), 797 (m), 754 (m), 722 (m), 697 (w), 626 (m), 477 (w), 459 (m).

**Mössbauer** (solid, 80 K):  $\delta = 0.17$  mm/s,  $|\Delta E_Q| = 0.88$  mm/s,  $\Gamma = 0.36$  mm/s.

**Elem. Anal.:** Anal. Calcd. for KC<sub>50</sub>H<sub>79</sub>FeN<sub>3</sub>S<sub>2</sub>O<sub>6</sub>Si<sub>2</sub>: C, 58.11; H, 7.71; N, 4.07. Found: C, 58.08; H, 7.99; N, 4.04.

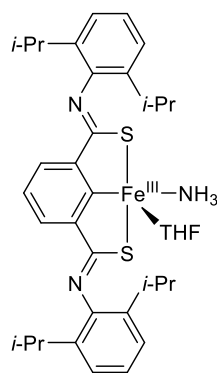

**[LFe<sup>III</sup>(NH<sub>3</sub>)(THF)] (10):** A bomb flask was charged with **5-Et<sub>2</sub>O** (59.4 mg, 0.046 mmol, 1.0 equiv) in 2 mL THF, giving a dark, opaque red-orange solution. On a Schlenk line, the flask contents were frozen in liquid nitrogen and the headspace gas evacuated. The flask was then closed, keeping the contents frozen in LN<sub>2</sub>. The Schlenk line was then cycled three times with NH<sub>3</sub>(g), then a 12.55 mL bulb was charged with 182 mbar NH<sub>3</sub>(g) (0.0922 mmol at 298 K, 2.0 equiv). The reaction flask was then opened to the bulb containing NH<sub>3</sub>(g), and NH<sub>3</sub>(g) was allowed to condense in the flask for 30 minutes. After the gas transfer, the flask was closed and warmed to room temperature while stirring; the solution became more translucent and orange in color. The reaction was stirred for 1 hour at room temperature, then THF was

removed under reduced pressure, leaving an orange solid. The bomb flask was closed and moved back into an N<sub>2</sub>-filled glovebox. The solids were dissolved in 2 mL Et<sub>2</sub>O and placed at -40 °C, resulting in crystallization. From this crop, 52.2 mg (86% yield) of bright orange crystals were collected.

**Evans** (THF-*d*<sub>8</sub>, 298 K):  $\mu_{\text{eff}} = 4.1 \pm 0.1 \mu_{\text{B}}$ .

**<sup>1</sup>H NMR** (400 MHz, THF-*d*<sub>8</sub>):  $\delta$  174.9 (1H\*, NH<sub>3</sub>), 11.7 (4H, H3'/5' or *i*Pr CH), 6.3 (2H, H4' or H4/6), 2.7 (4H, H3'/5' or *i*Pr CH), 2.4 (12H, *i*Pr CH<sub>3</sub>), -0.4 (12H, *i*Pr CH<sub>3</sub>), -50.1 (2H, H4' or H4/6), -78.1 (1H, H5) ppm. Assignments are labeled according to the numbering scheme for the ligand **1**. Signals for coordinated THF were not observed, presumably because of exchange with THF-*d*<sub>8</sub>. \*This signal is assigned to NH<sub>3</sub> because such a downfield signal is only observed in **10**. It likely integrates to less than 3H due to extreme broadening that prevents proper baseline corrections.

**<sup>1</sup>H NMR** (400 MHz, C<sub>6</sub>D<sub>6</sub>):  $\delta$  44.5, 12.7, 9.0, 8.6, 7.1, 5.5, 4.1, 1.8, 0.9, -0.9, -17.3, -47.1, -86.4 ppm. Integrations are not reported due to extreme broadening of many signals.

**UV-Vis** (THF): 302 nm ( $\epsilon = 12,100 \text{ cm}^{-1} \text{ M}^{-1}$ ), 350 nm ( $\epsilon = 8,600 \text{ cm}^{-1} \text{ M}^{-1}$ ), 460 nm ( $\epsilon = 5,500 \text{ cm}^{-1} \text{ M}^{-1}$ ).

**FT-IR** (solid, cm<sup>-1</sup>): 3352 (w), 3299 (w), 3236 (w), 3159 (w), 3055 (w), 2957 (m), 2926 (m), 2885 (m), 2863 (m), 1595 (s), 1578 (s), 1458 (m), 1429 (m), 1380 (w), 1358 (m), 1325 (m), 1254 (m), 1236 (m), 1181 (m), 1107 (w), 1097 (m), 1058 (w), 1042 (w), 1024 (m), 997 (w), 934 (m), 916 (m), 863 (m), 812 (m), 797 (m), 756 (m), 720 (m), 697 (w), 659 (w), 624 (m), 508 (w).

**Mössbauer** (solid, 80 K):  $\delta = 0.35 \text{ mm/s}$ ,  $|\Delta E_{\text{Q}}| = 4.28 \text{ mm/s}$ ,  $\Gamma_{\text{L}} = 0.55 \text{ mm/s}$ ,  $\Gamma_{\text{R}} = 0.43 \text{ mm/s}$ .

**Elem. Anal.**: Anal. Calcd. for C<sub>36</sub>H<sub>48</sub>FeN<sub>3</sub>OS<sub>2</sub>: C, 65.64; H, 7.34; N, 6.38. Found: C, 65.63; H, 7.46; N, 6.11.

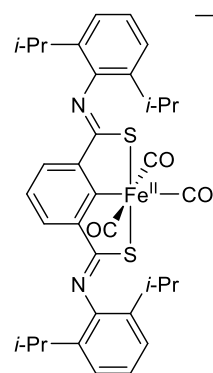

**K[LFe<sup>II</sup>(CO)<sub>3</sub>] (**11**):** A bomb flask was charged with **6** (81.5 mg, 0.032 mmol, 1.0 equiv) in 3 mL THF, giving a dark purple solution. The flask was moved to a Schlenk line which was cycled three times with CO gas. The flask was submerged in liquid nitrogen and the headspace gasses were evacuated, then the flask was opened to 1 atmosphere of CO(g) while warming and stirring. Upon melting, the solution changed color to opaque orange, changing to transparent orange within 1 minute. The reaction was stirred for 30 minutes at room temperature, then THF was removed under reduced pressure, leaving an amber-colored oil. Upon addition of 2 mL Et<sub>2</sub>O, a light-yellow solid precipitated from the oil. The solids were reconcentrated from Et<sub>2</sub>O, then re-suspended in 2 mL Et<sub>2</sub>O and collected over a Celite pad, washing with Et<sub>2</sub>O until the filtrate was clear. The solids were re-dissolved in THF and eluted through the Celite pad, concentrated to an oil, and precipitated from pentane to give 69.0 mg (79% yield) of **11** as a light-yellow solid.

**<sup>1</sup>H NMR** (400 MHz, THF-*d*<sub>8</sub>): δ 8.04 (d, *J* = 7.4 Hz, 2H, H4/6), 7.12 (t, *J* = 7.4 Hz, 1H, H5), 6.99 (d, *J* = 7.6 Hz, 4H, H3'/5'), 6.83 (t, *J* = 7.6 Hz, 2H, H4'), 3.08 (sept, *J* = 6.9 Hz, 4H, *i*Pr CH), 1.21 (d, *J* = 6.9 Hz, 12H, *i*Pr CH<sub>3</sub>), 1.09 (d, *J* = 6.9 Hz, 12H, *i*Pr CH<sub>3</sub>) ppm.

**<sup>13</sup>C{<sup>1</sup>H} NMR** (201 MHz, THF-*d*<sub>8</sub>): δ 212.24, 210.45 (CO); 181.88 (C=N); 173.25, 152.34, 150.89, 138.33, 127.07, 123.06, 123.03, 122.44 (Ar); 29.19, 24.26, 24.19 (*i*Pr) ppm.

**UV-Vis** (THF): 320 nm (ε = 6,300 cm<sup>-1</sup> M<sup>-1</sup>), 400 nm (ε = 1,600 cm<sup>-1</sup> M<sup>-1</sup>).

**FT-IR** (solid, cm<sup>-1</sup>): 3254 (w), 2959 (m), 2924 (m), 2865 (m), 2078 (m), 2013 (s), 1988 (s), 1919 (m), 1909 (m), 1588 (m), 1568 (s), 1462 (m), 1429 (m), 1397 (m), 1380 (m), 1360 (m), 1325 (m), 1299 (m), 1274 (m), 1252 (m), 1232 (m), 1187 (m), 1158 (m), 1097 (m), 1058 (m), 1015 (m), 962 (m), 924 (m), 801 (m), 767 (m), 728 (m), 612 (s), 602 (s), 585 (m), 559 (m), 453 (m).

**Mössbauer** (solid, 80 K): δ = 0.01 mm/s, |Δ*E*<sub>Q</sub>| = 0.99 mm/s, Γ = 0.30 mm/s.

**Elem. Anal.**: Anal. Calcd. for KC<sub>35</sub>H<sub>37</sub>FeN<sub>2</sub>O<sub>3</sub>S<sub>2</sub>: C, 60.68; H, 5.38; N, 4.04. Found: C, 60.59; H, 5.54; N, 3.79.

## NMR Spectra

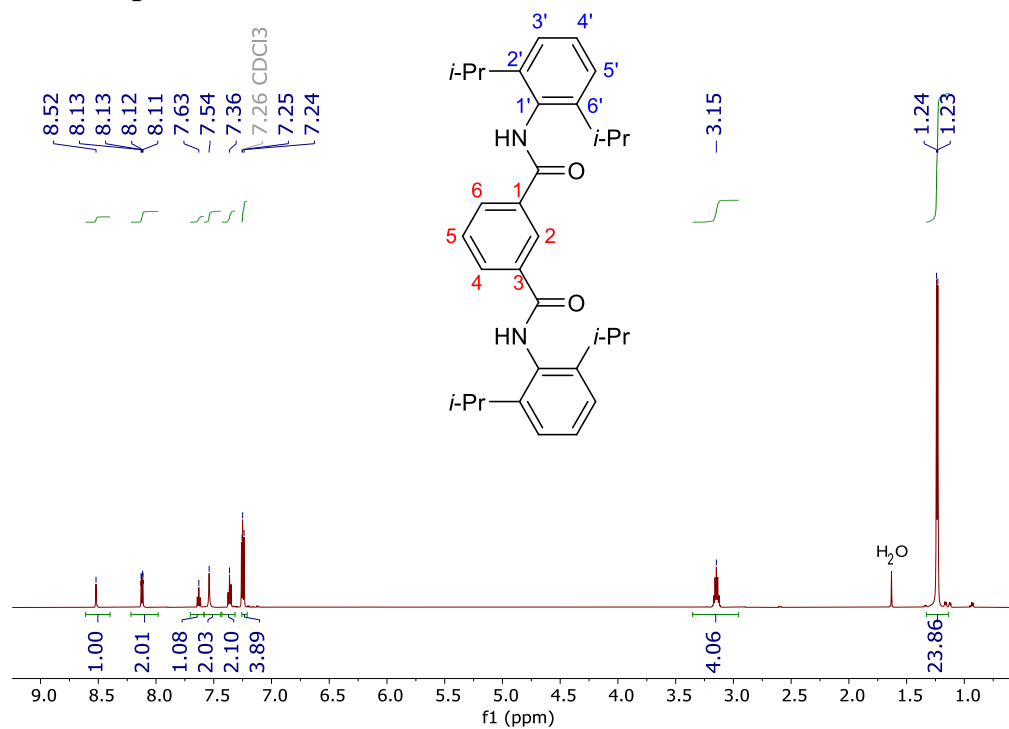

**Figure S1.** <sup>1</sup>H NMR spectrum of **Dipp-OCO** in CDCl<sub>3</sub>.

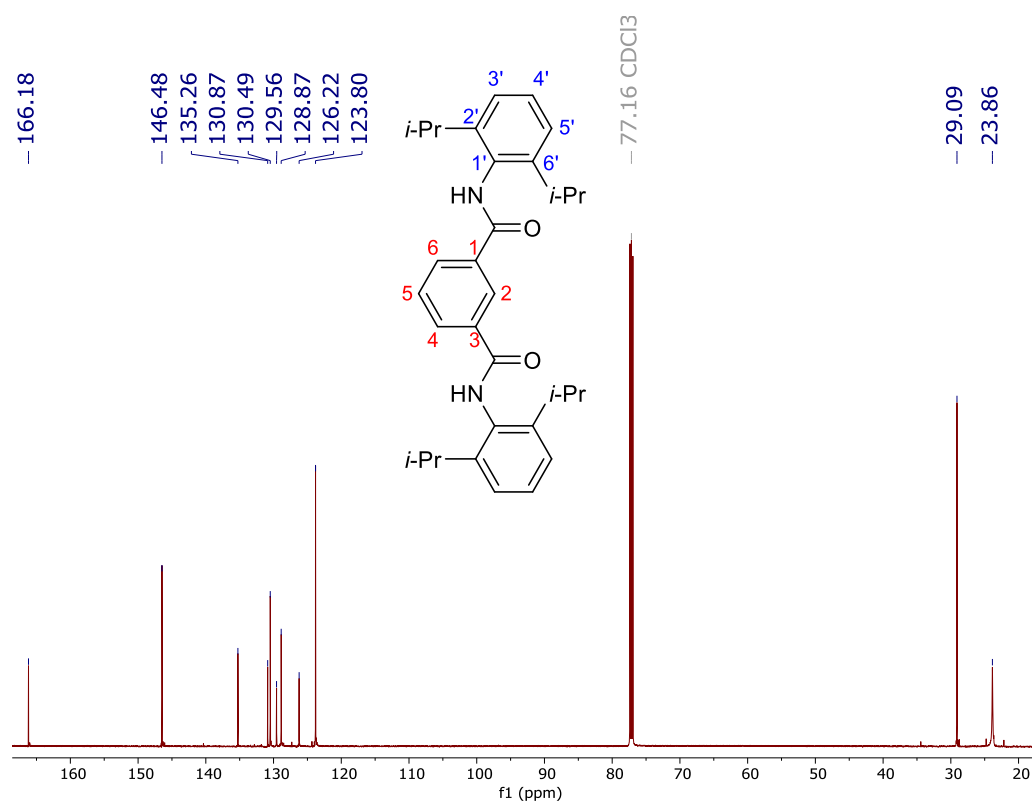

**Figure S2.** <sup>13</sup>C{<sup>1</sup>H} NMR spectrum of **Dipp-OCO** in CDCl<sub>3</sub>.

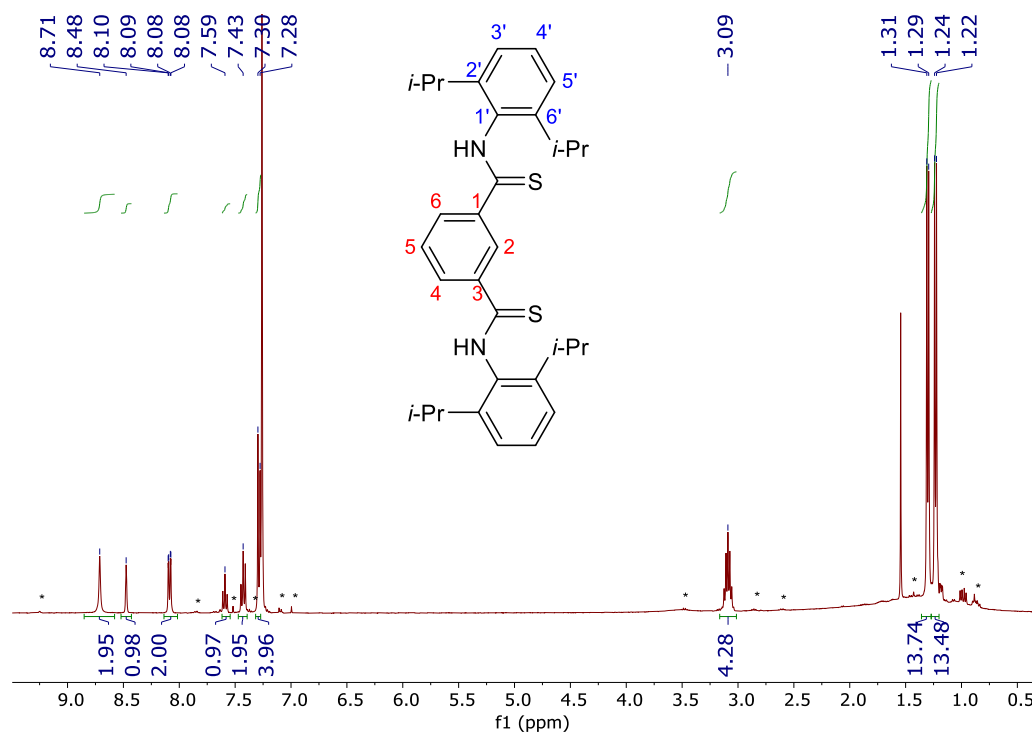

**Figure S3.** <sup>1</sup>H NMR spectrum of crystallized **1** in CDCl<sub>3</sub>. \*Signals belonging to the unidentified co-crystallized impurity.

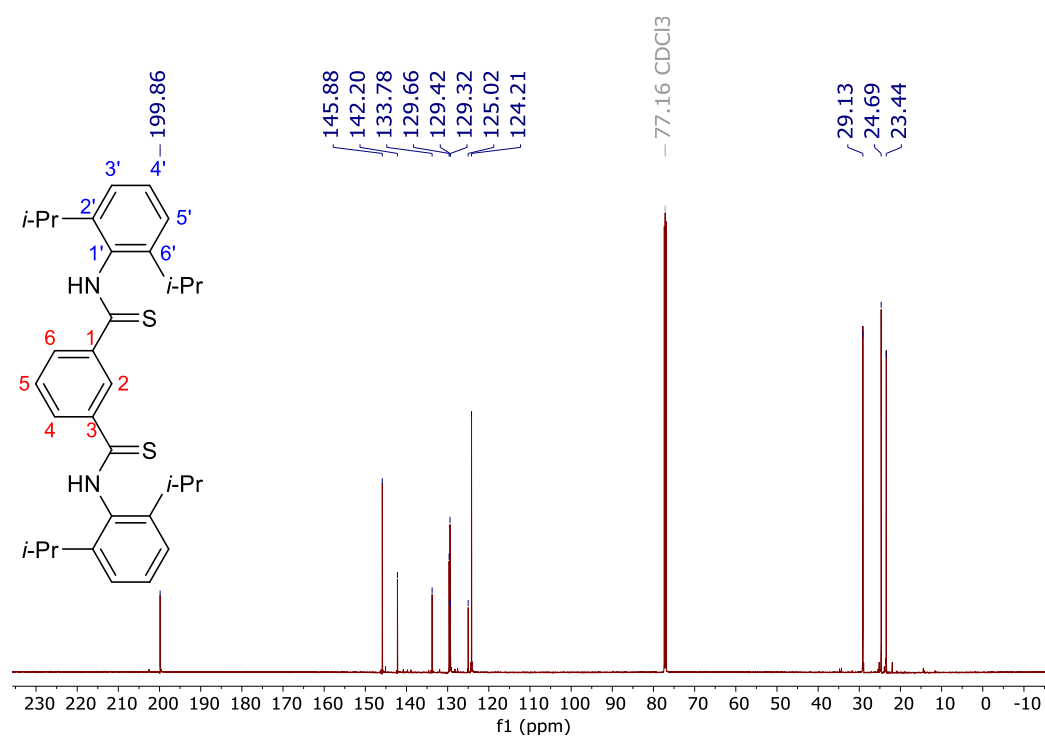

**Figure S4.** <sup>13</sup>C{<sup>1</sup>H} NMR spectrum of crystallized **1** in CDCl<sub>3</sub>. Signals near the baseline are assigned to an impurity.

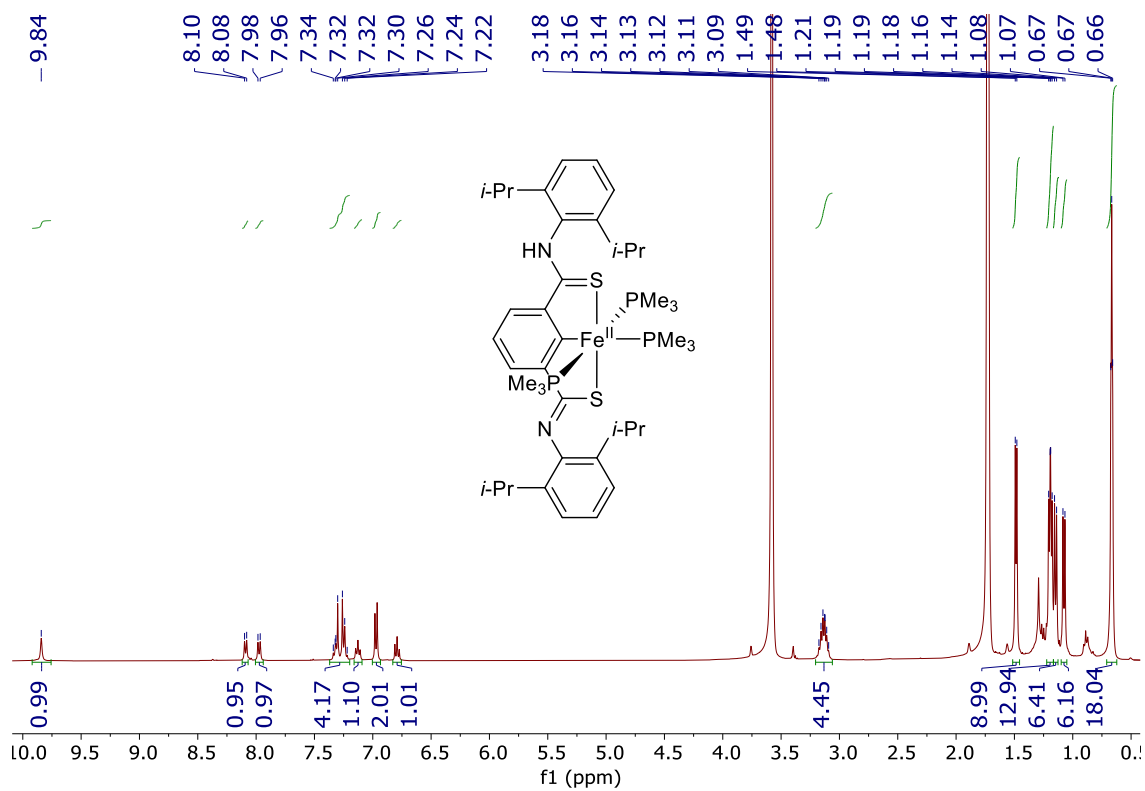

**Figure S5.** <sup>1</sup>H NMR spectrum of **2** in THF-*d*<sub>8</sub>.

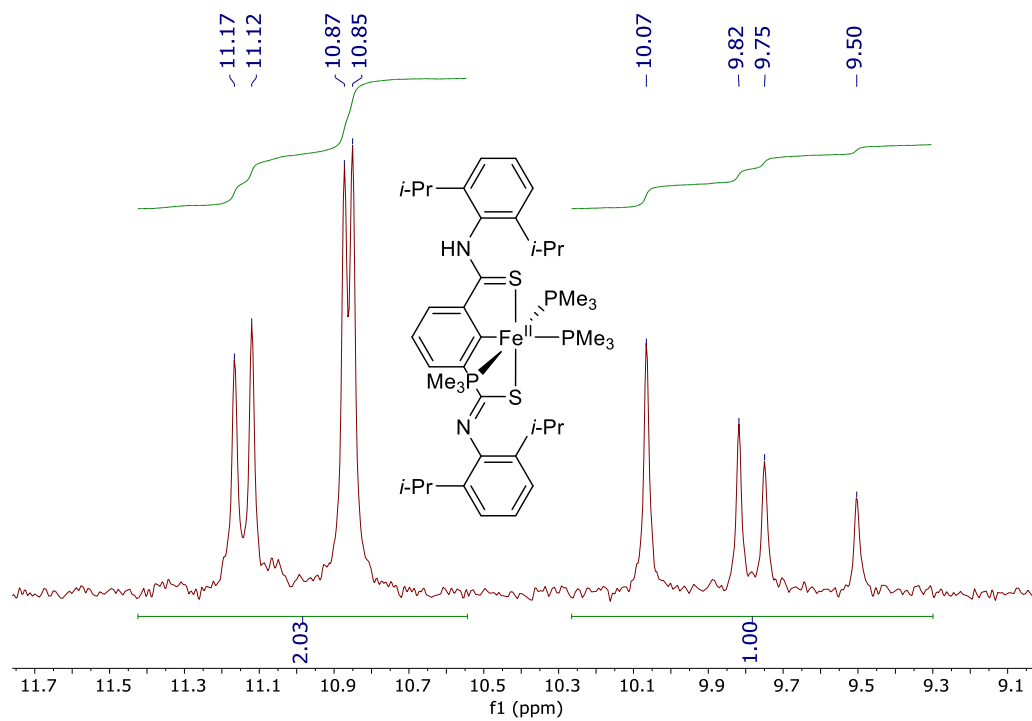

**Figure S6.** <sup>31</sup>P{<sup>1</sup>H} NMR spectrum of **2** in THF-*d*<sub>8</sub>.

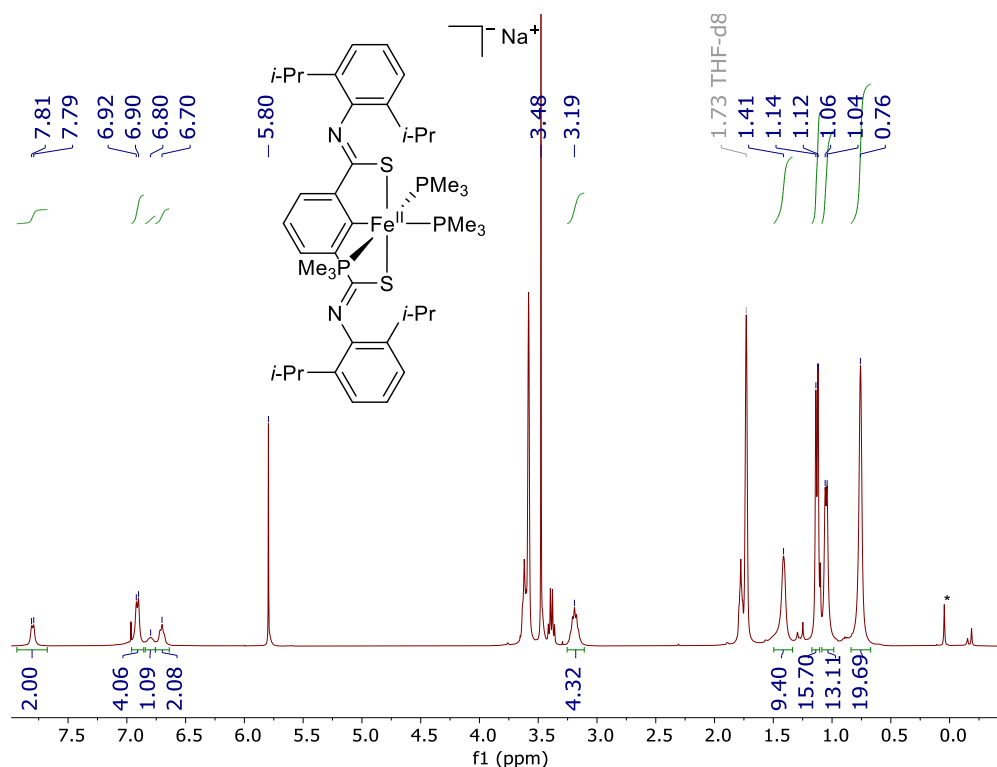

**Figure S7.**  $^1\text{H}$  NMR spectrum of **3-Na** in  $\text{THF-}d_8$ . Signals at 5.80 and 3.48 ppm belong to the 1,3,5-trimethoxybenzene capillary used to determine spectroscopic yield. Residual  $\text{Et}_2\text{O}$  overlaps the doublet at 1.13 ppm, increasing its integration. \*Trace  $\text{HN}(\text{TMS})_2$ .

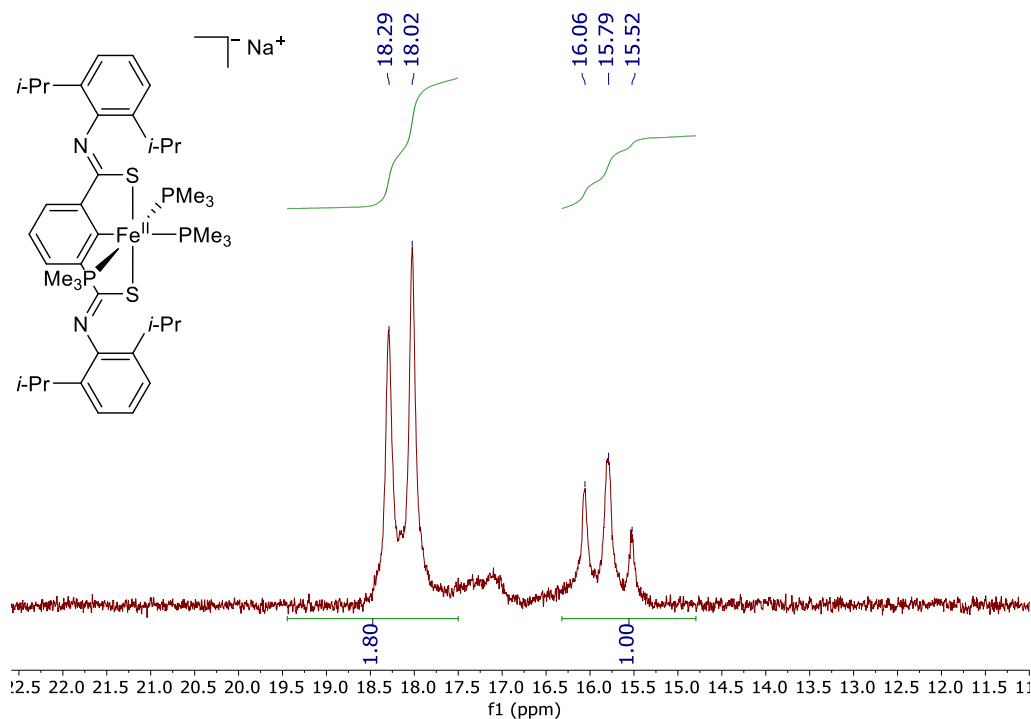

**Figure S8.**  $^{31}\text{P}\{^1\text{H}\}$  NMR spectrum of **3-Na** in  $\text{THF-}d_8$ . There is an unknown impurity at 17 ppm.

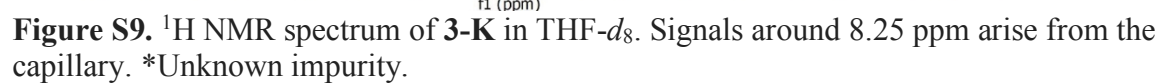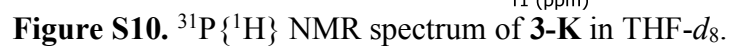



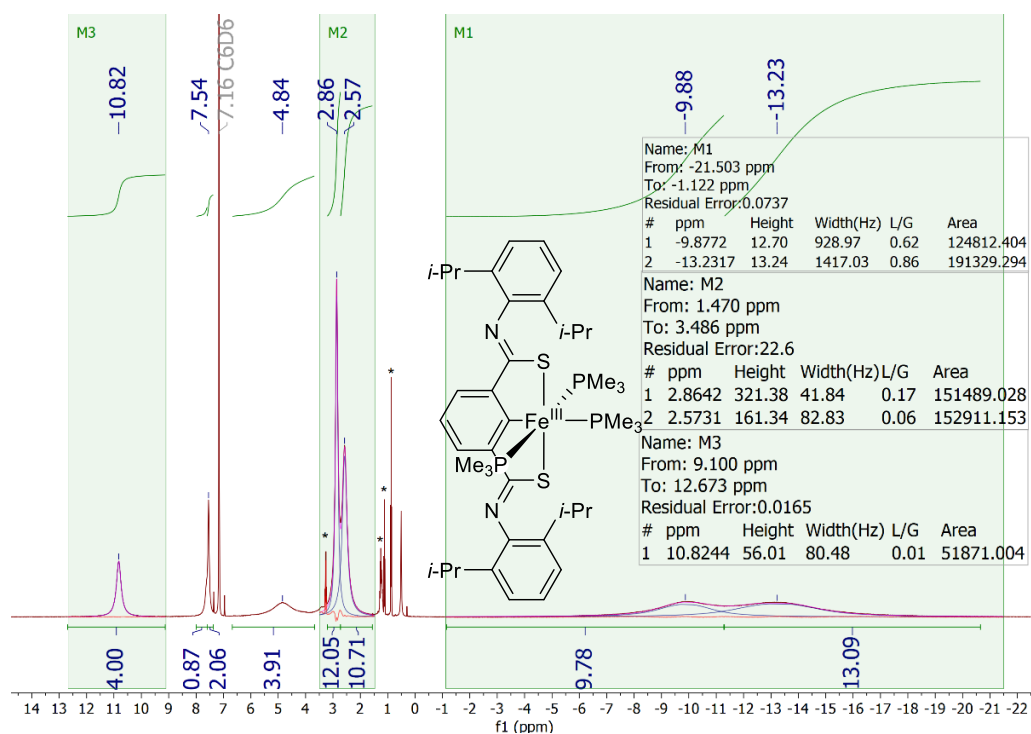

**Figure S11.**  $^1\text{H}$  NMR spectrum of **4** in  $\text{THF-d}_8$ . \*Residual  $\text{Et}_2\text{O}$  and pentane. Parameters of the peak-fitted region are shown in the box.

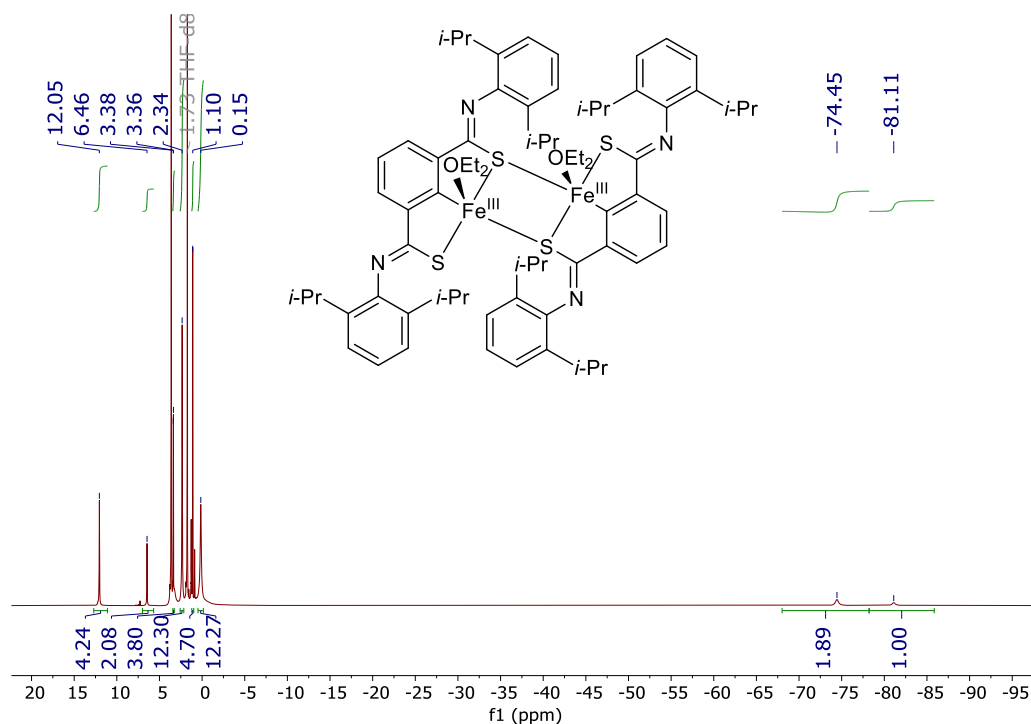

**Figure S12.**  $^1\text{H}$  NMR spectrum of **5-Et<sub>2</sub>O** in  $\text{THF-d}_8$ . Note that upon dissolution in THF, Mössbauer spectroscopy indicates there is a change in the iron coordination environment (Figure 87), which may be consistent with the dimer breaking up into monomers. This could explain why this NMR spectrum suggests a higher symmetry than the dimeric structure.

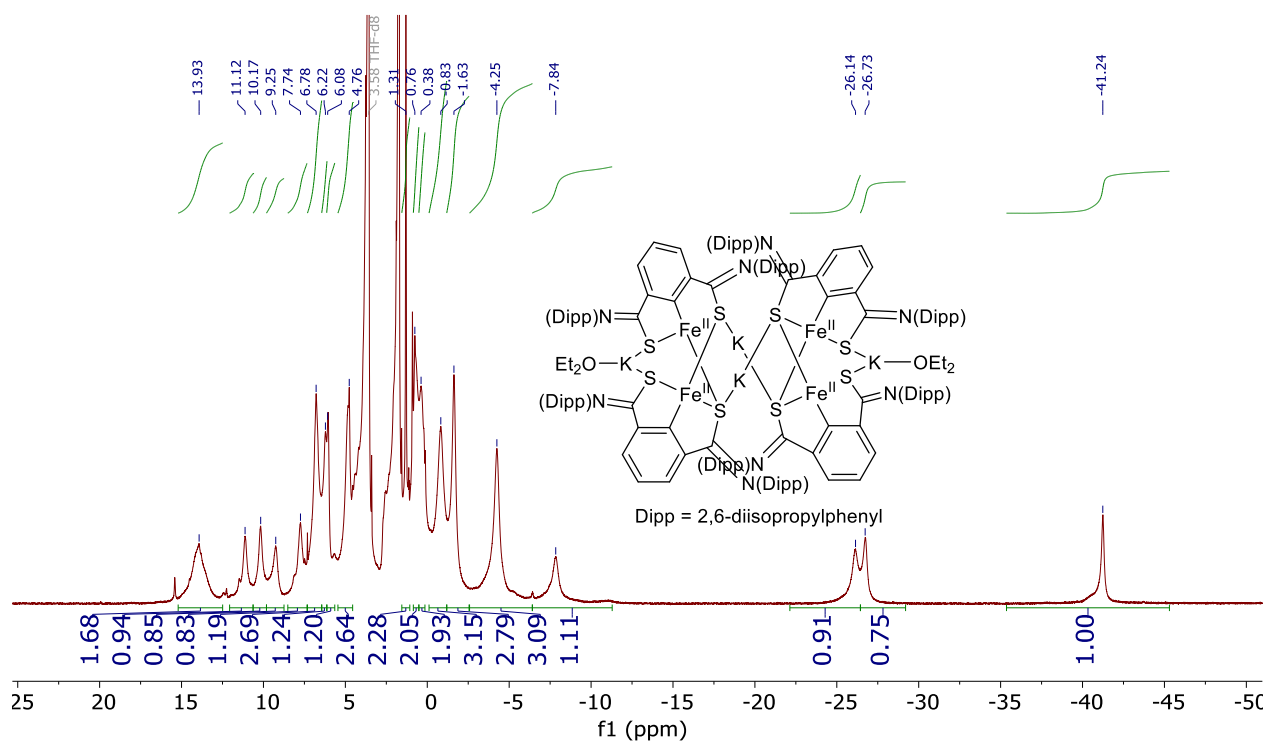

**Figure S13.** <sup>1</sup>H NMR spectrum of **6** in THF-*d*<sub>8</sub>.

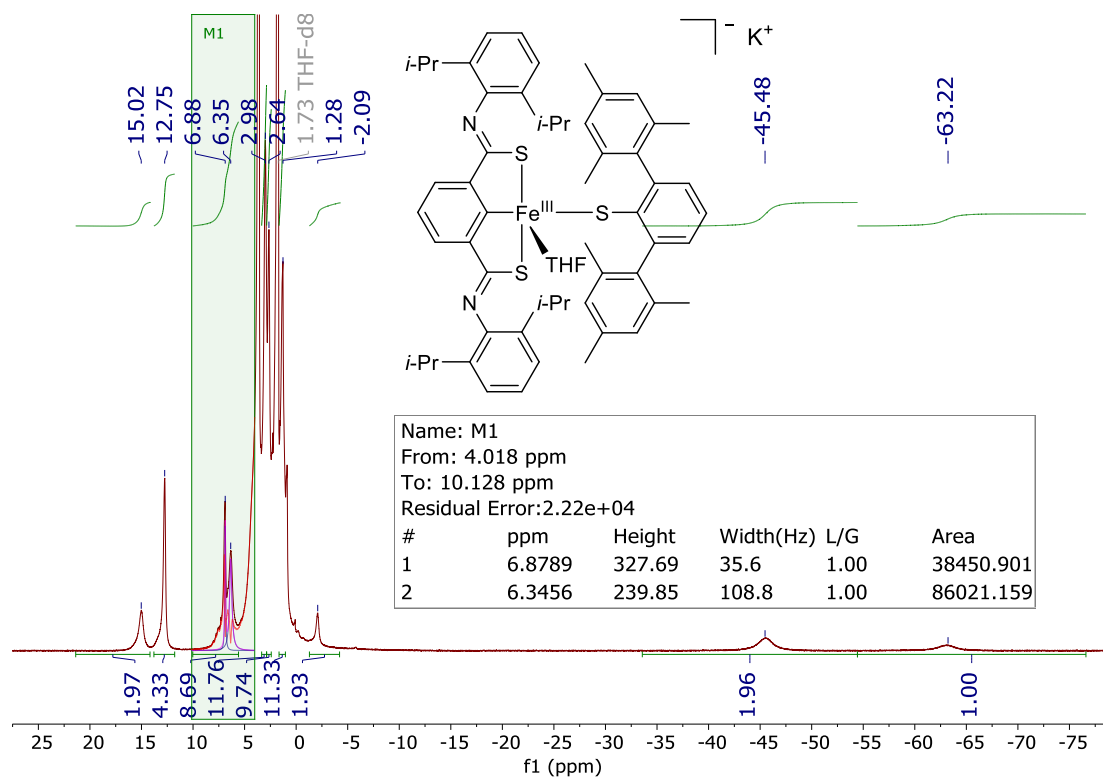

**Figure S14.** <sup>1</sup>H NMR spectrum of **7** in THF-*d*<sub>8</sub>. Parameters of the peak-fitted region are shown in the box.

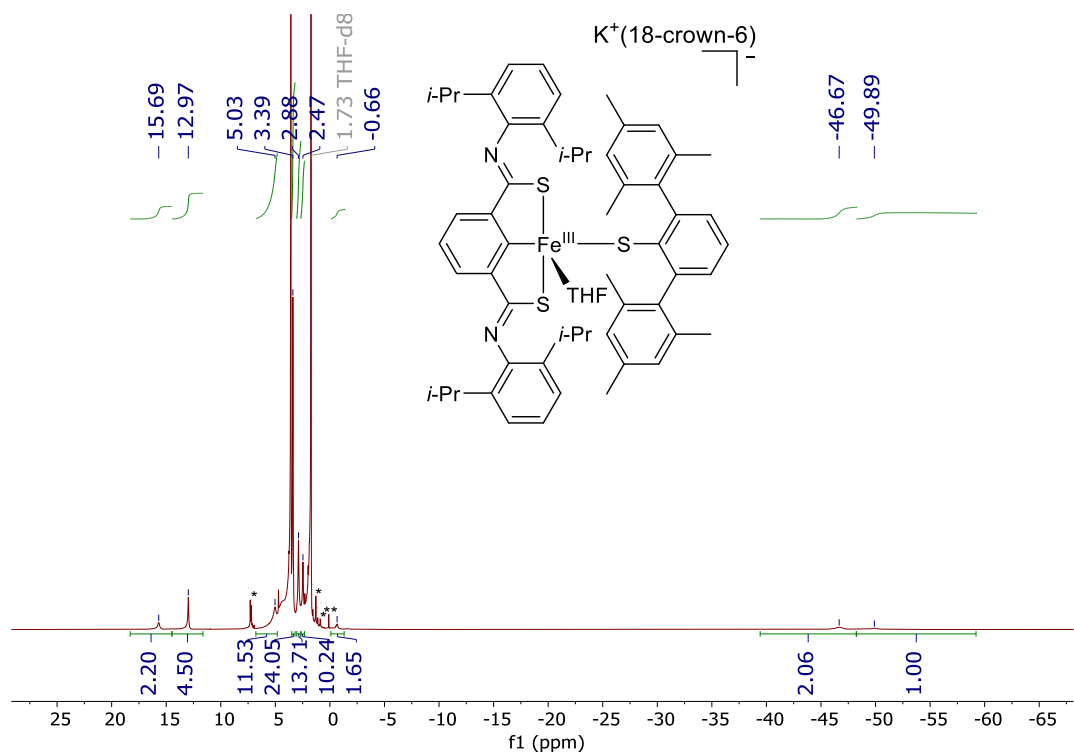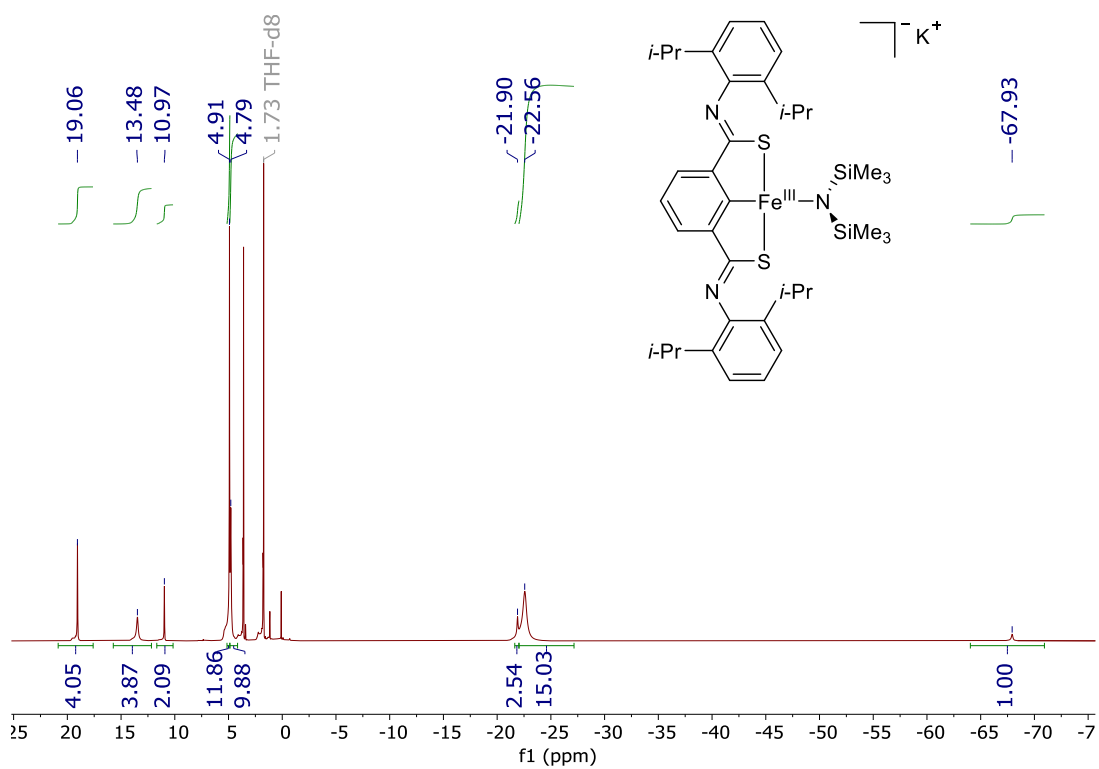

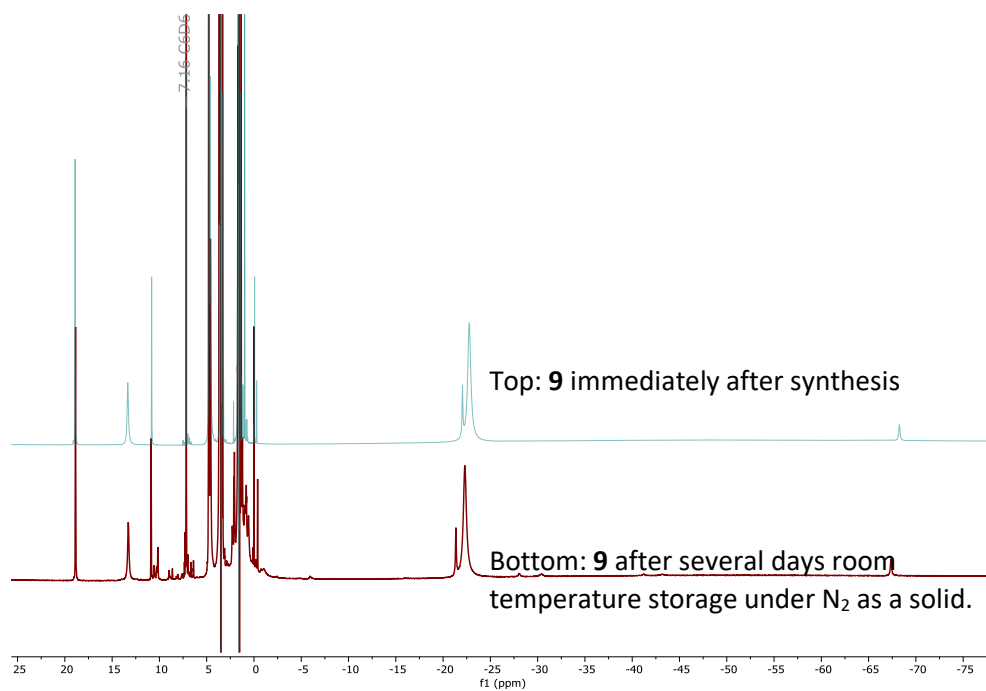

**Figure S17.** Stacked  $^1\text{H}$  NMR spectra of **9** immediately after its synthesis (top spectrum) and after several days of room temperature storage under  $\text{N}_2$  as a solid (bottom spectrum) in 9:1 THF: $\text{C}_6\text{D}_6$ . Several new peaks are observed (some outside the region for diamagnetic compounds) and are assigned to an unidentified decomposition product.

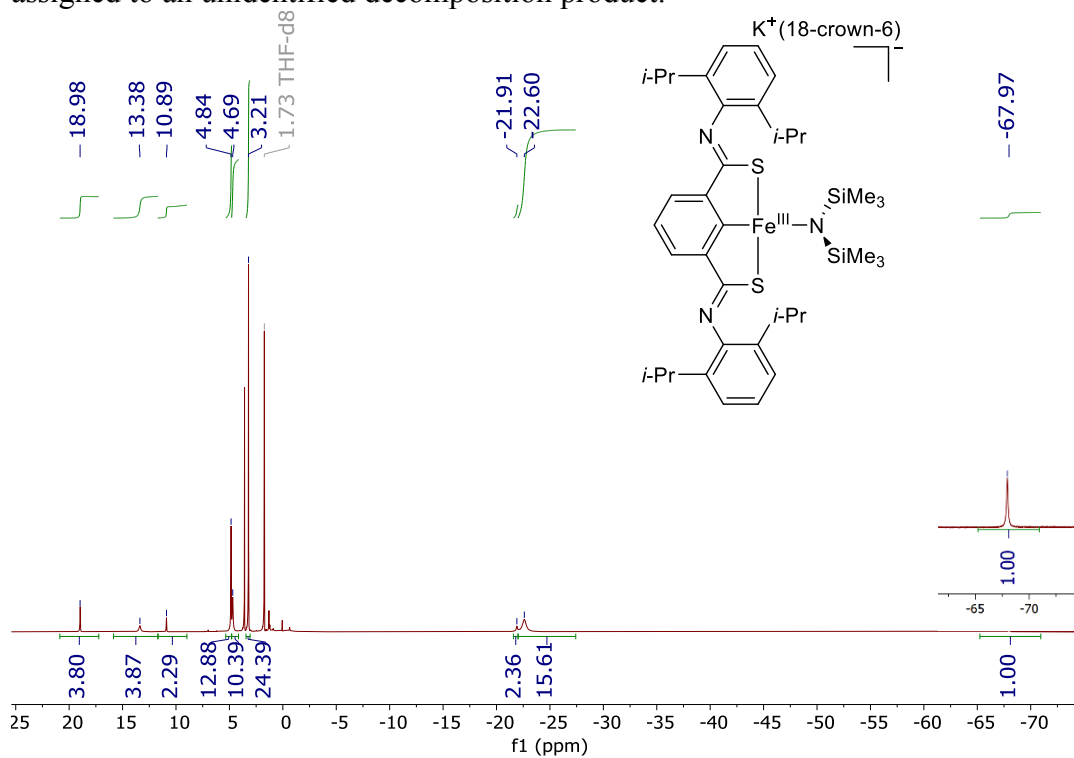

**Figure S18.**  $^1\text{H}$  NMR spectrum of **9-crown** in THF- $d_8$ . Inset shows the peak at  $-67.97$  ppm.

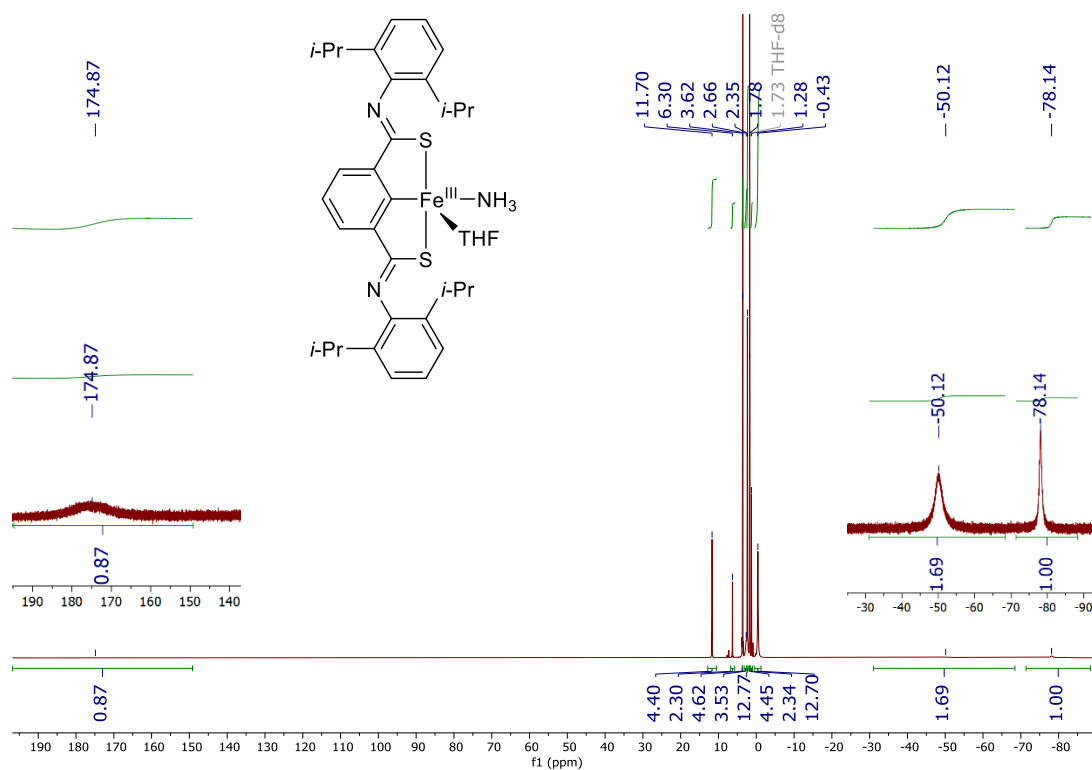

**Figure S19.** <sup>1</sup>H NMR spectrum of **10** in THF-*d*<sub>8</sub>, with insets showing the peaks at 174.87, -50.12, and -78.14 ppm.

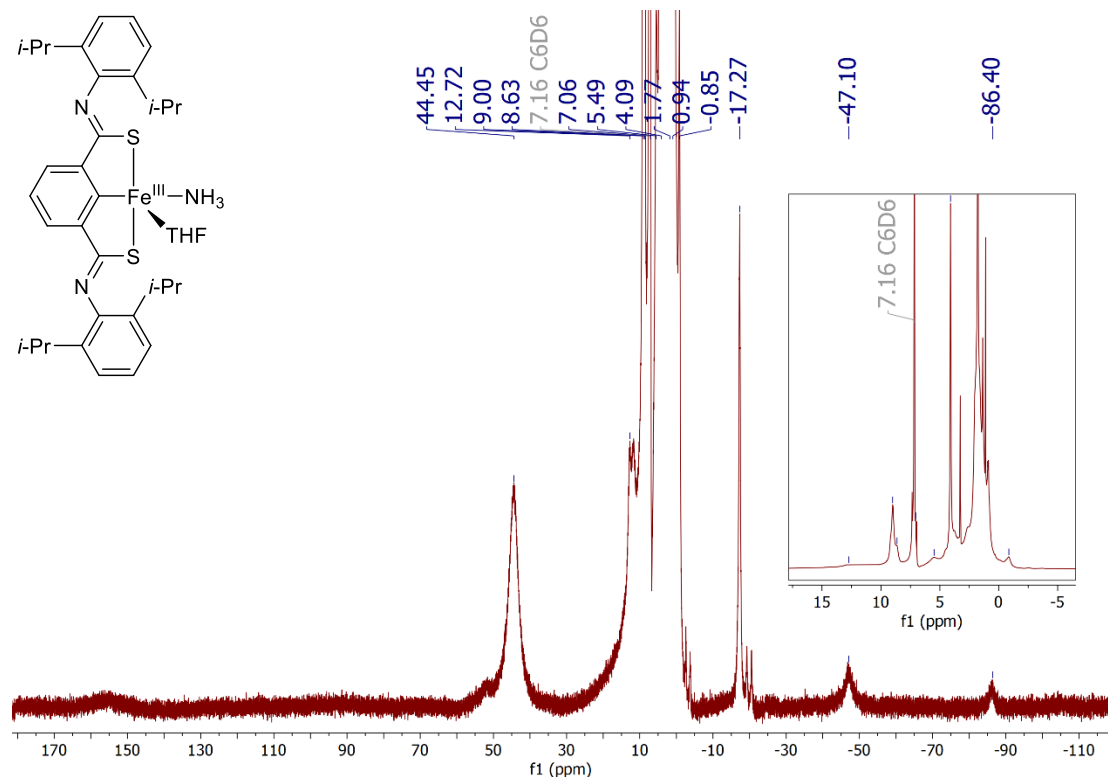

**Figure S20.** <sup>1</sup>H NMR spectrum of **10** in C<sub>6</sub>D<sub>6</sub>. There may be an extremely broad signal at ca. 155 ppm.

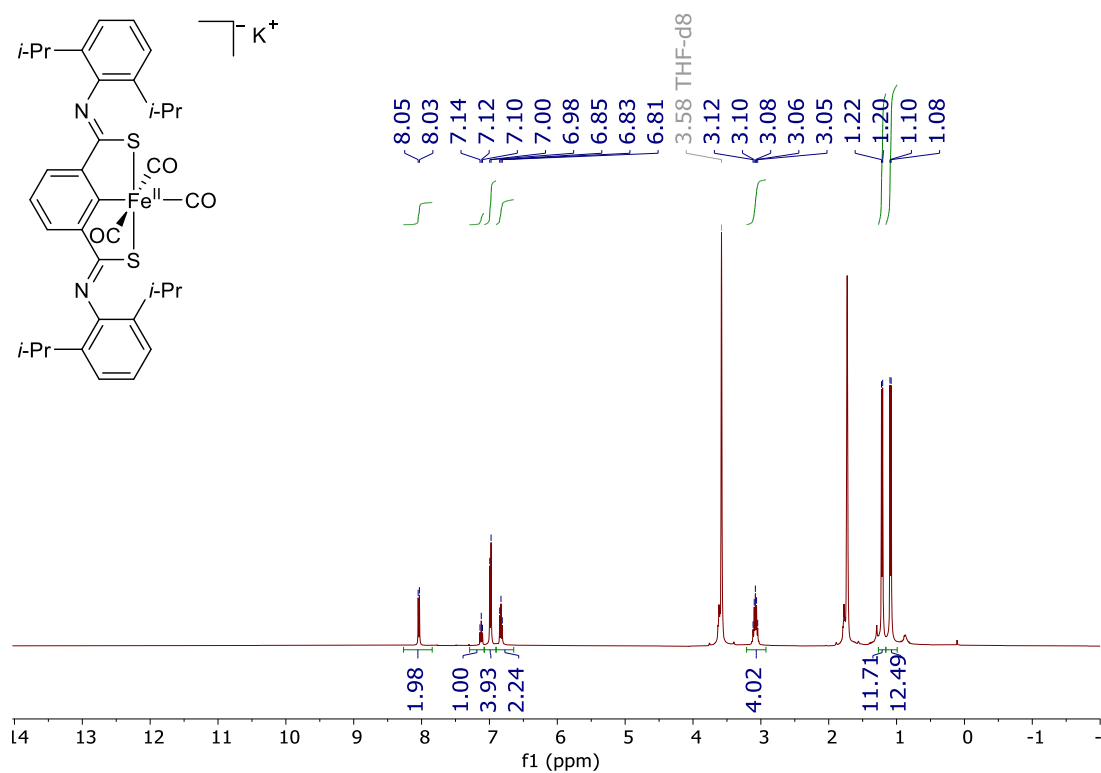

**Figure S21.**  $^1H$  NMR spectrum of **11** in THF- $d_8$ .

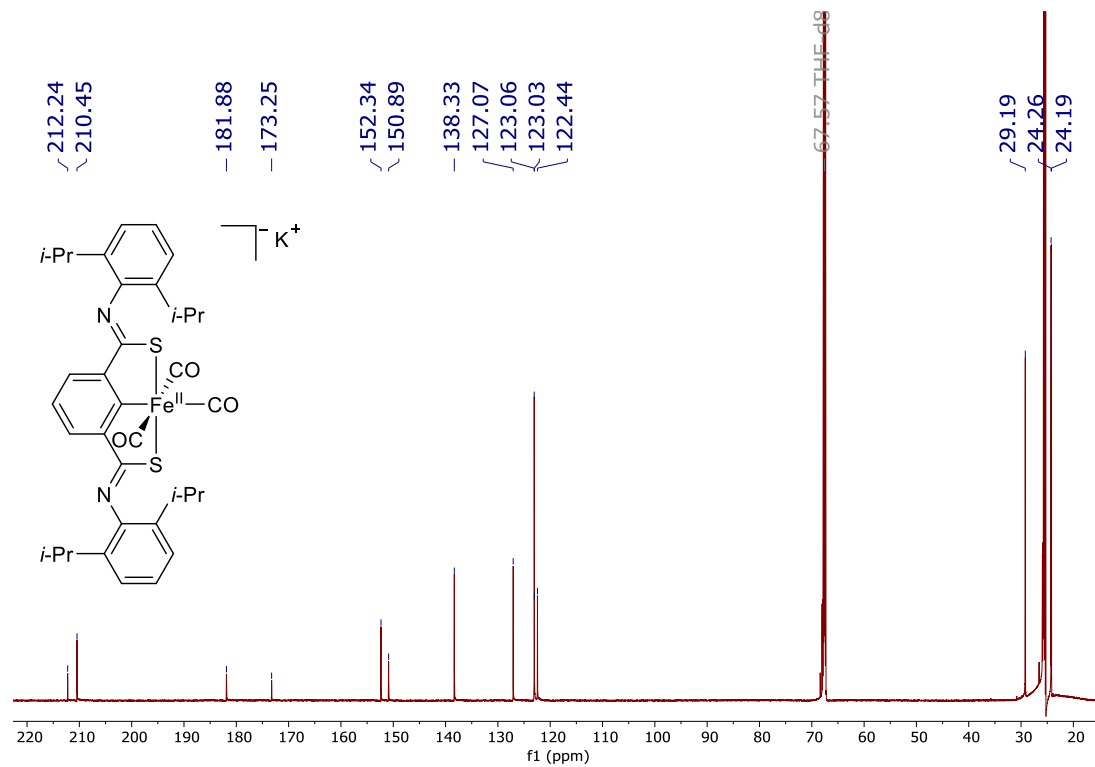

**Figure S22.**  $^{13}C\{^1H\}$  NMR spectrum of **11** in THF- $d_8$ .

## UV-Visible Absorption Spectra

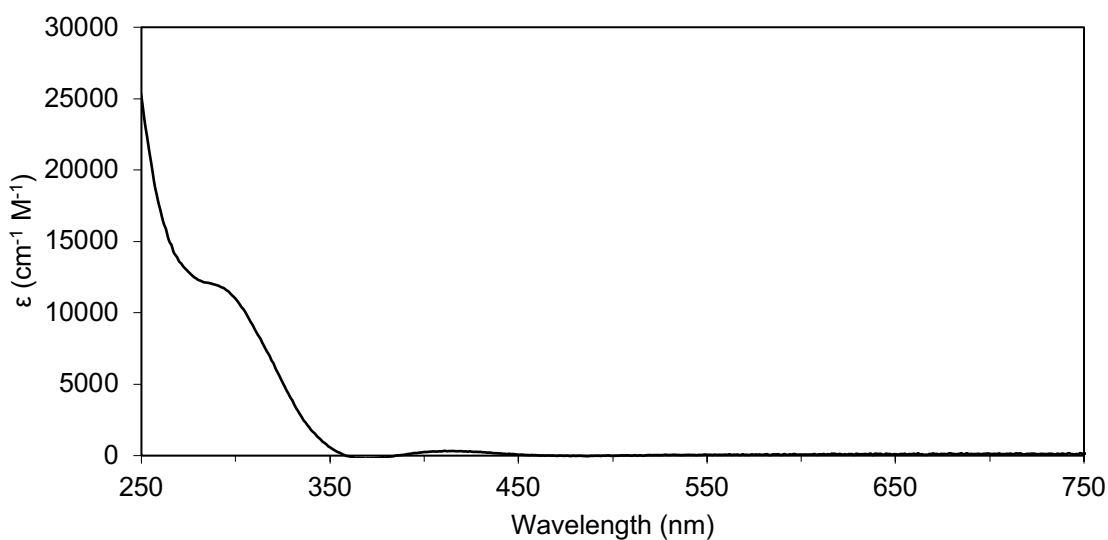

**Figure S23.** UV-visible spectrum of **1** in THF with absorptions at 291 nm ( $\epsilon = 11,900 \text{ cm}^{-1} \text{M}^{-1}$ ) and 415 nm ( $320 \text{ cm}^{-1} \text{M}^{-1}$ ).

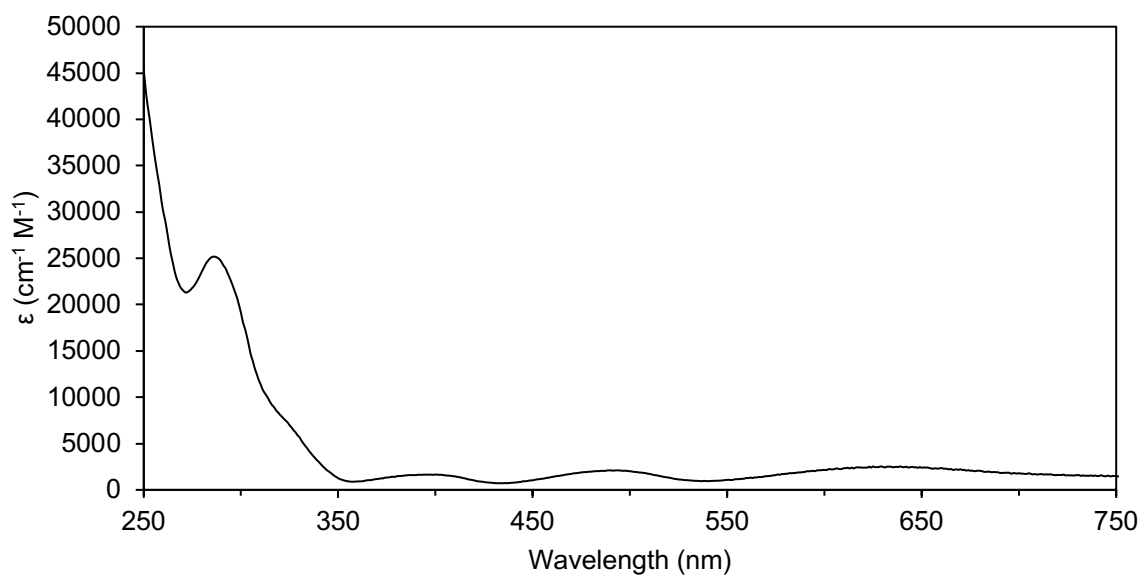

**Figure S24.** UV-visible spectrum of **2** in THF with absorptions at 286 nm ( $\epsilon = 10,400 \text{ cm}^{-1} \text{M}^{-1}$ ), 395 nm ( $\epsilon = 1,600 \text{ cm}^{-1} \text{M}^{-1}$ ), 493 nm ( $\epsilon = 2,100 \text{ cm}^{-1} \text{M}^{-1}$ ), and 633 nm ( $\epsilon = 2,400 \text{ cm}^{-1} \text{M}^{-1}$ ).

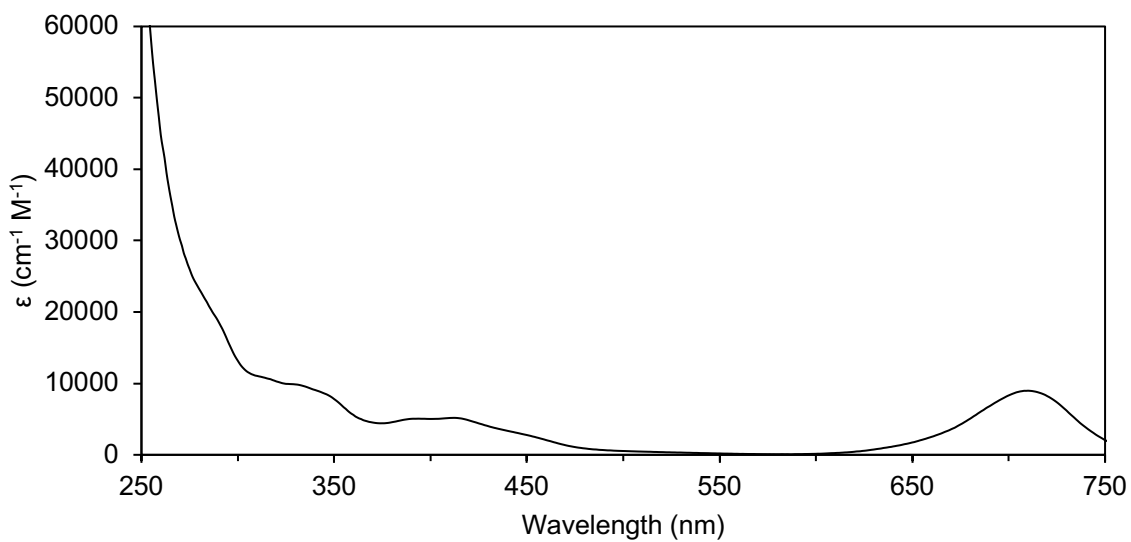

**Figure S25.** UV-visible spectrum of **4** in THF with absorptions at 332 nm ( $\epsilon = 9,800 \text{ cm}^{-1} \text{M}^{-1}$ ), 389 nm ( $\epsilon = 5,000 \text{ cm}^{-1} \text{M}^{-1}$ ), 417 nm ( $\epsilon = 5,000 \text{ cm}^{-1} \text{M}^{-1}$ ), and 710 nm ( $\epsilon = 9,000 \text{ cm}^{-1} \text{M}^{-1}$ ).

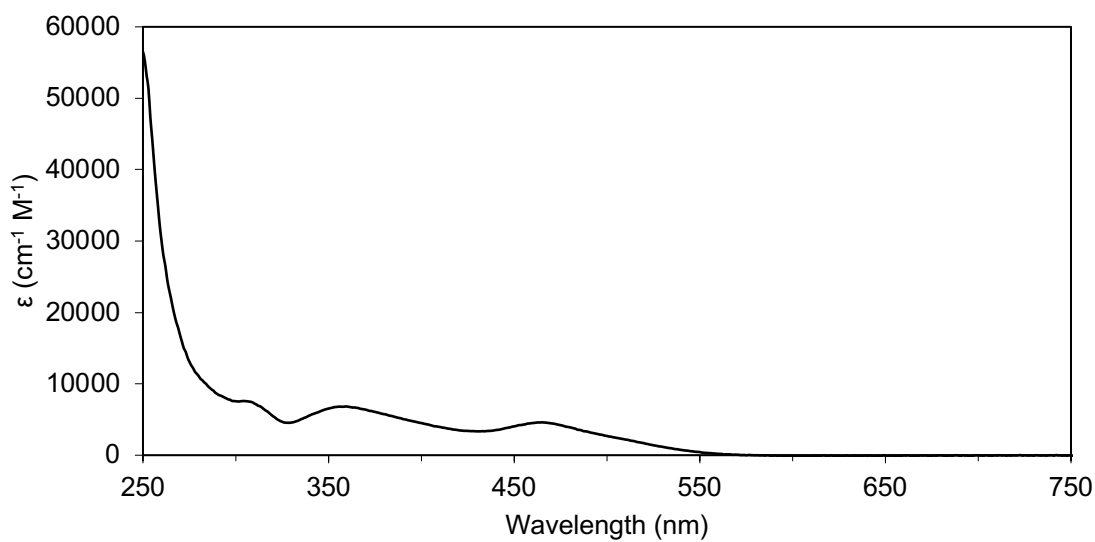

**Figure S26.** UV-visible spectrum of **5-THF** in THF with absorptions at 304 nm ( $\epsilon = 7,600 \text{ cm}^{-1} \text{M}^{-1}$ ), 353 nm ( $\epsilon = 6,800 \text{ cm}^{-1} \text{M}^{-1}$ ), and 458 nm ( $\epsilon = 4,600 \text{ cm}^{-1} \text{M}^{-1}$ ).



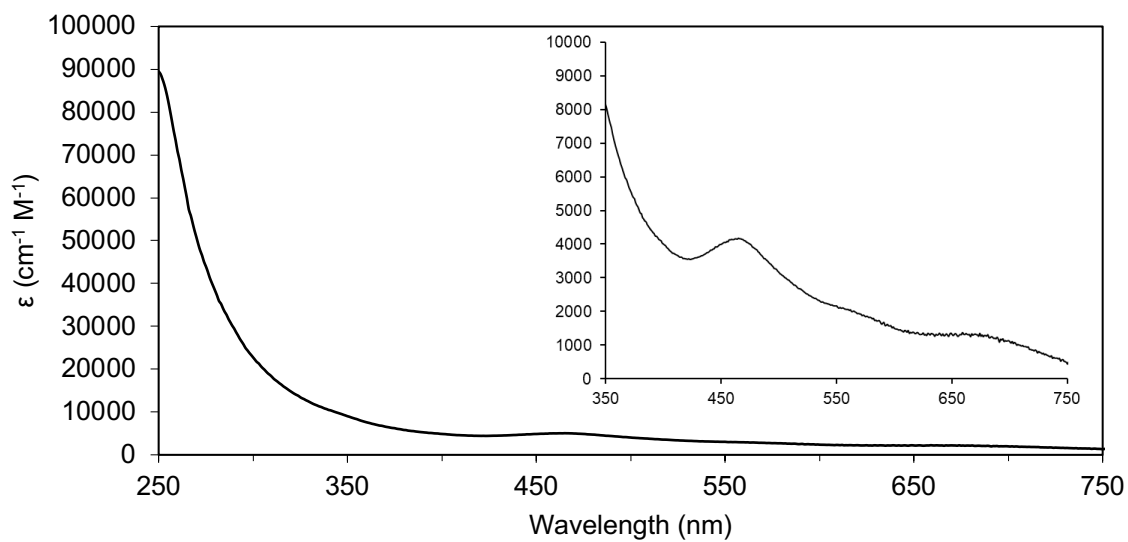

**Figure S27.** UV-visible spectrum of **6** in THF with absorptions at 465 nm ( $\epsilon = 4,200 \text{ cm}^{-1} \text{ M}^{-1}$ ) and 662 nm ( $\epsilon = 1,300 \text{ cm}^{-1} \text{ M}^{-1}$ ).

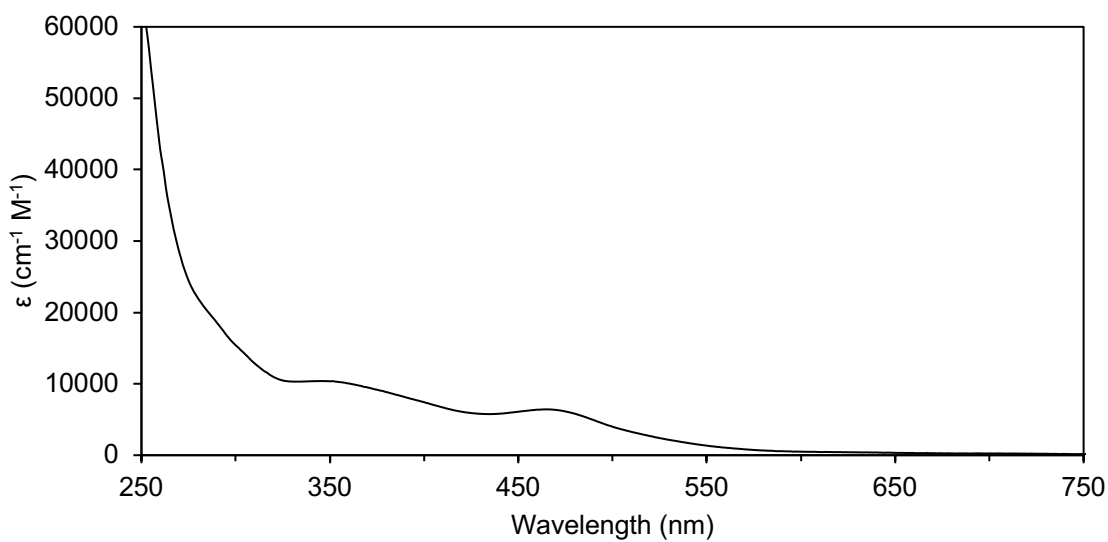

**Figure S28.** UV-visible spectrum of **7** in THF with absorptions at 345 nm ( $\epsilon = 10,400 \text{ cm}^{-1} \text{ M}^{-1}$ ) and 465 nm ( $\epsilon = 6,400 \text{ cm}^{-1} \text{ M}^{-1}$ ).

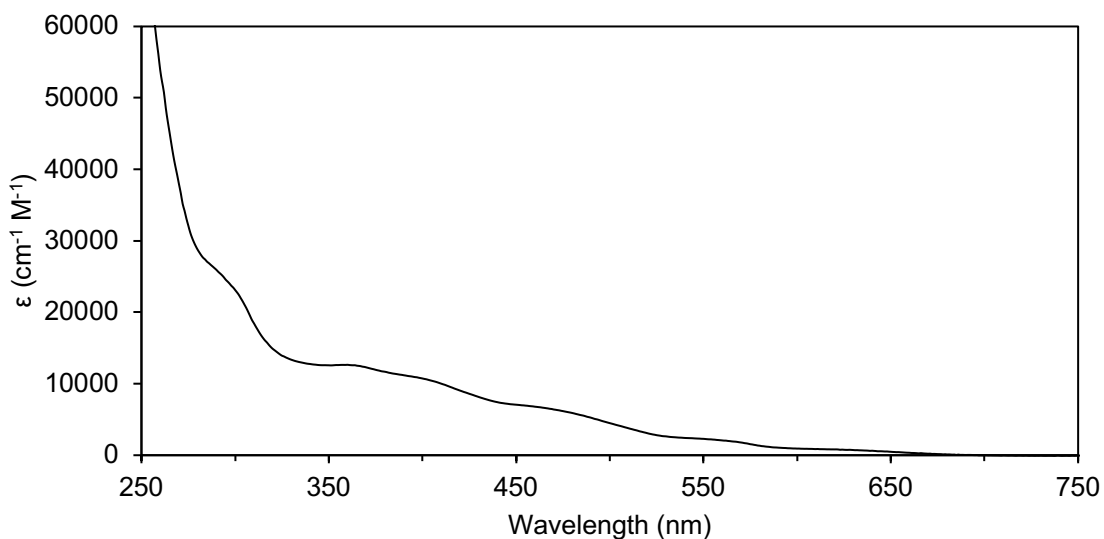

**Figure S29.** UV-visible spectrum of **7-crown** in THF with absorptions at 293 nm ( $\epsilon = 25,200 \text{ cm}^{-1} \text{ M}^{-1}$ ), 360 nm ( $\epsilon = 12,600 \text{ cm}^{-1} \text{ M}^{-1}$ ), 405 nm ( $\epsilon = 10,400 \text{ cm}^{-1} \text{ M}^{-1}$ ), and 468 nm ( $\epsilon = 6,500 \text{ cm}^{-1} \text{ M}^{-1}$ ).

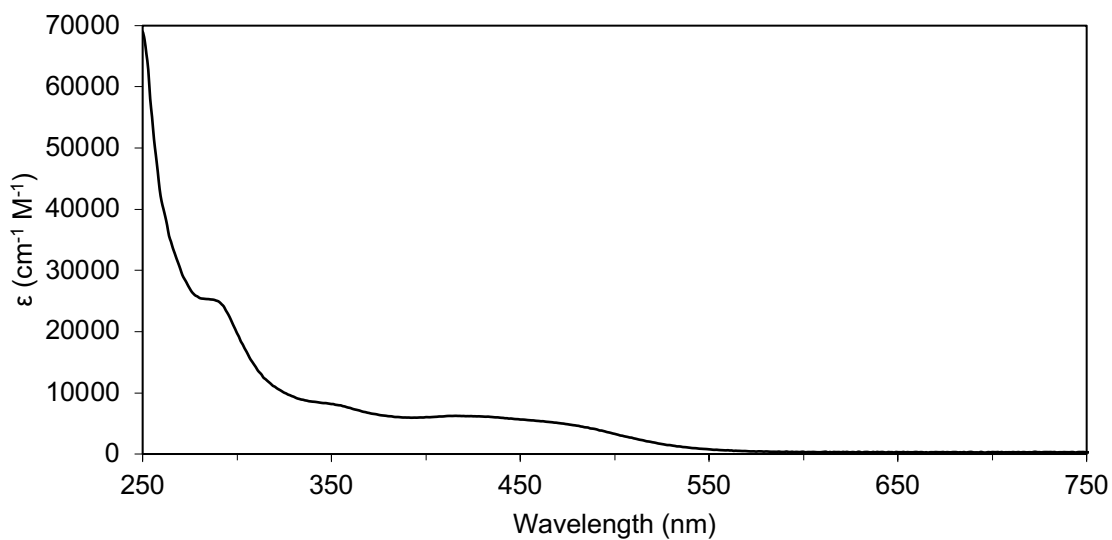

**Figure S30.** UV-visible spectrum of **9** in THF with absorptions at 287 nm ( $\epsilon = 25,200 \text{ cm}^{-1} \text{ M}^{-1}$ ), 358 nm ( $\epsilon = 7,600 \text{ cm}^{-1} \text{ M}^{-1}$ ), and 417 nm ( $\epsilon = 6,200 \text{ cm}^{-1} \text{ M}^{-1}$ ).

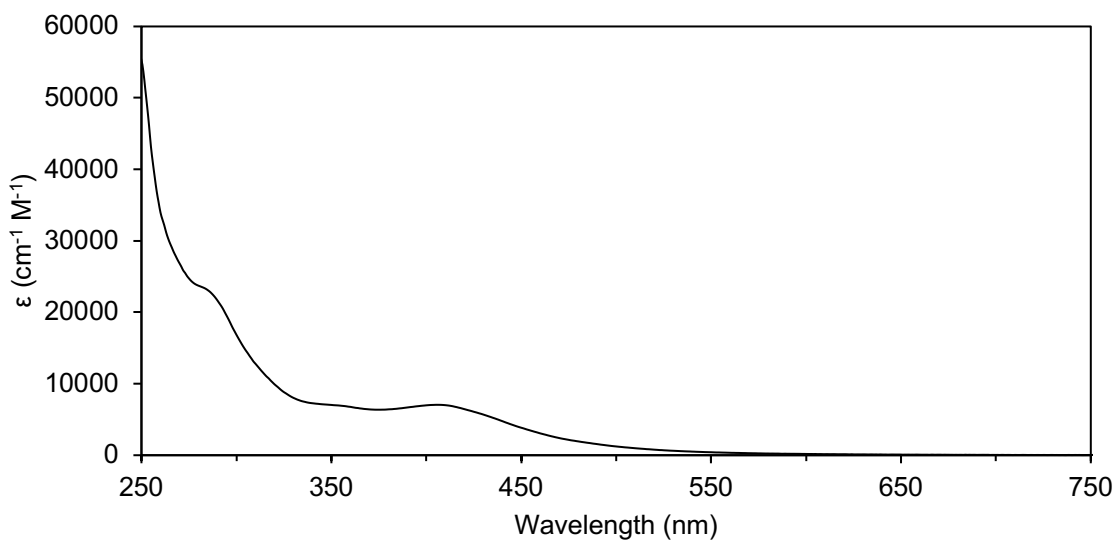

**Figure S31.** UV-visible spectrum of **9-crown** in THF with absorptions at 285 nm ( $\epsilon = 23,000 \text{ cm}^{-1} \text{ M}^{-1}$ ) and 408 nm ( $\epsilon = 7,000 \text{ cm}^{-1} \text{ M}^{-1}$ ).

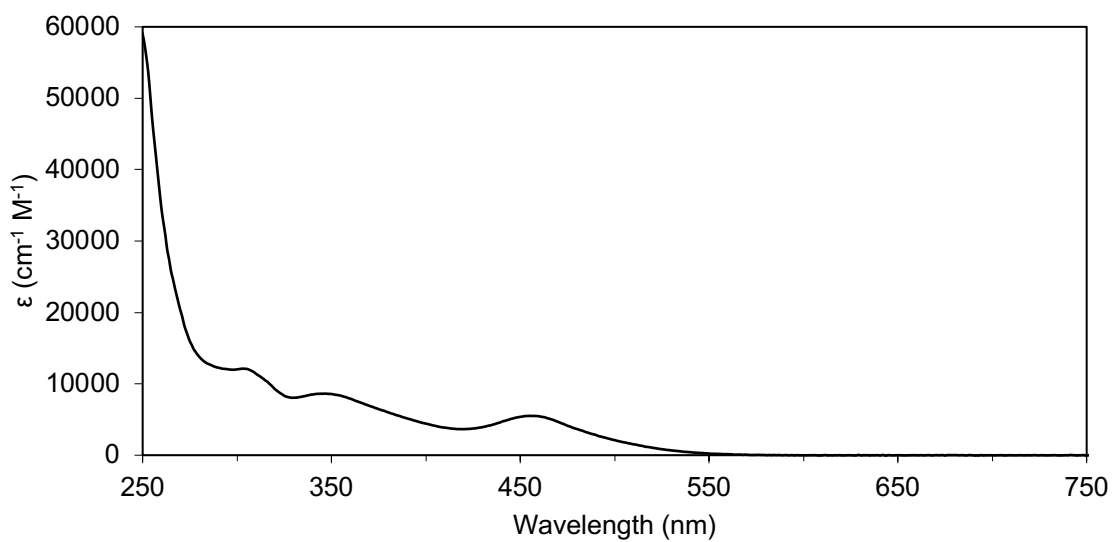

**Figure S32.** UV-visible spectrum of **10** in THF with absorptions at 302 nm ( $\epsilon = 12,100 \text{ cm}^{-1} \text{ M}^{-1}$ ), 350 nm ( $\epsilon = 8,600 \text{ cm}^{-1} \text{ M}^{-1}$ ), and 460 nm ( $\epsilon = 5,500 \text{ cm}^{-1} \text{ M}^{-1}$ ).

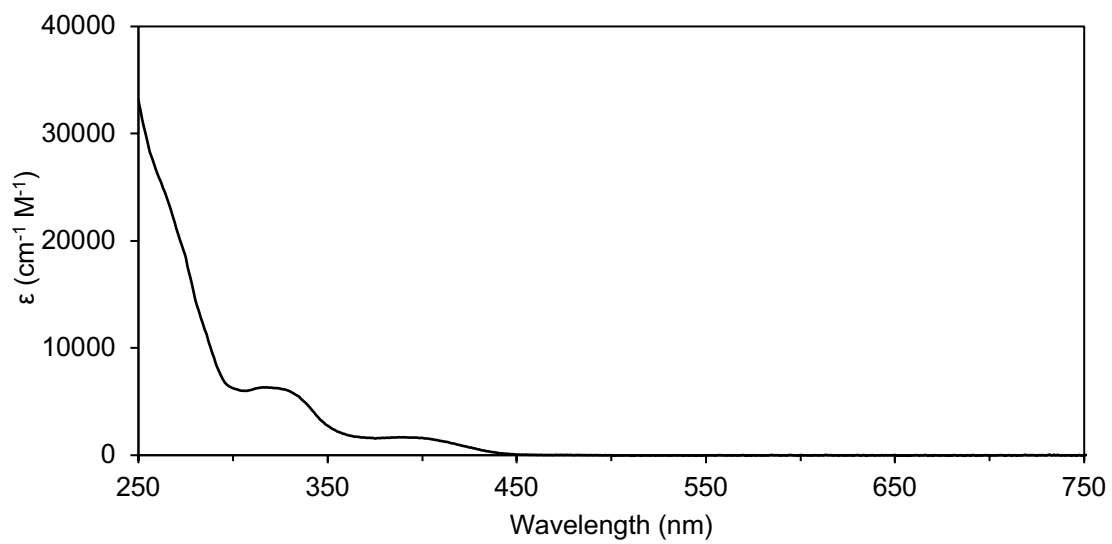

**Figure S33.** UV-visible spectrum of **11** in THF with absorptions at 320 nm ( $\epsilon = 6,300 \text{ cm}^{-1} \text{ M}^{-1}$ ) and 400 nm ( $\epsilon = 1,600 \text{ cm}^{-1} \text{ M}^{-1}$ ).

## IR Spectra

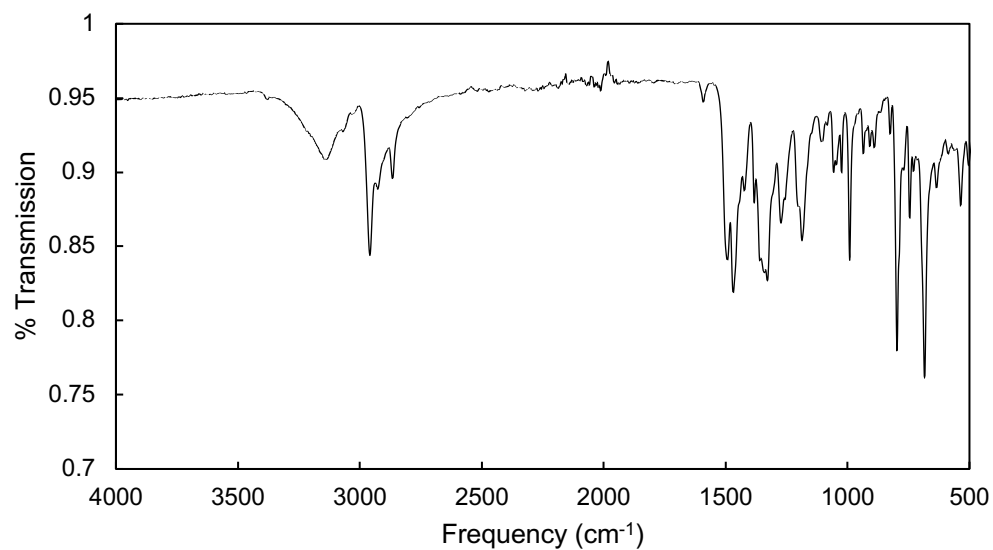

**Figure S34.** FT-IR spectrum of solid 1.

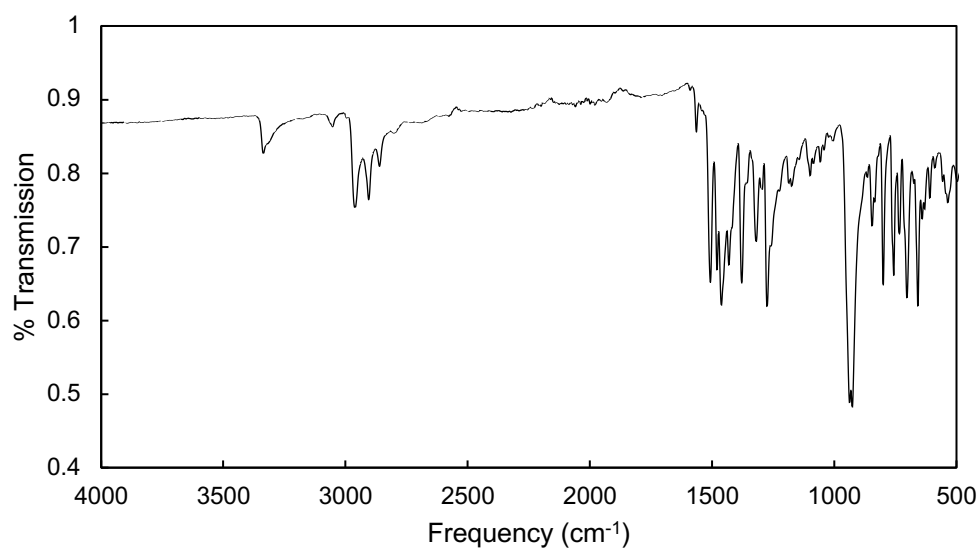

**Figure S35.** FT-IR spectrum of solid 2.

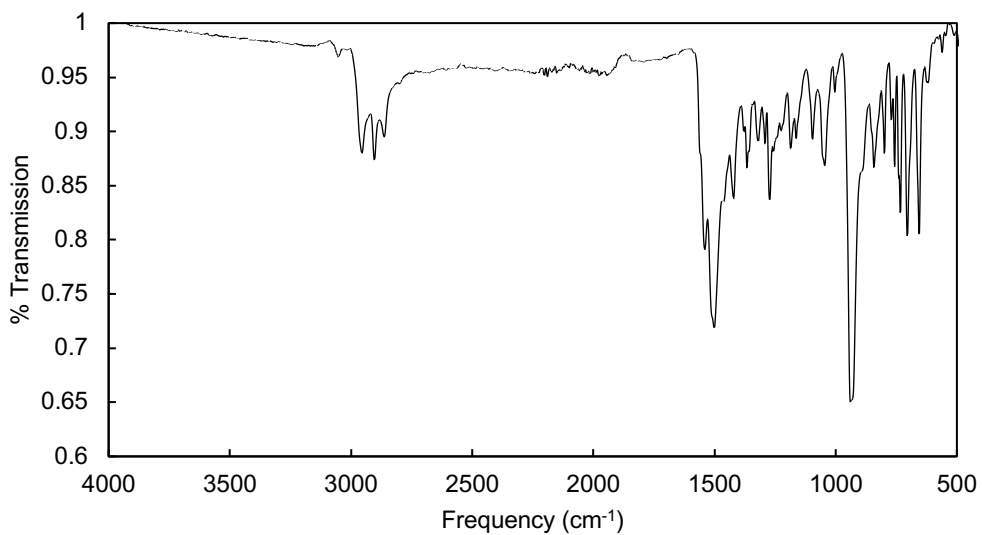

**Figure S36.** FT-IR spectrum of solid **3-Na**.

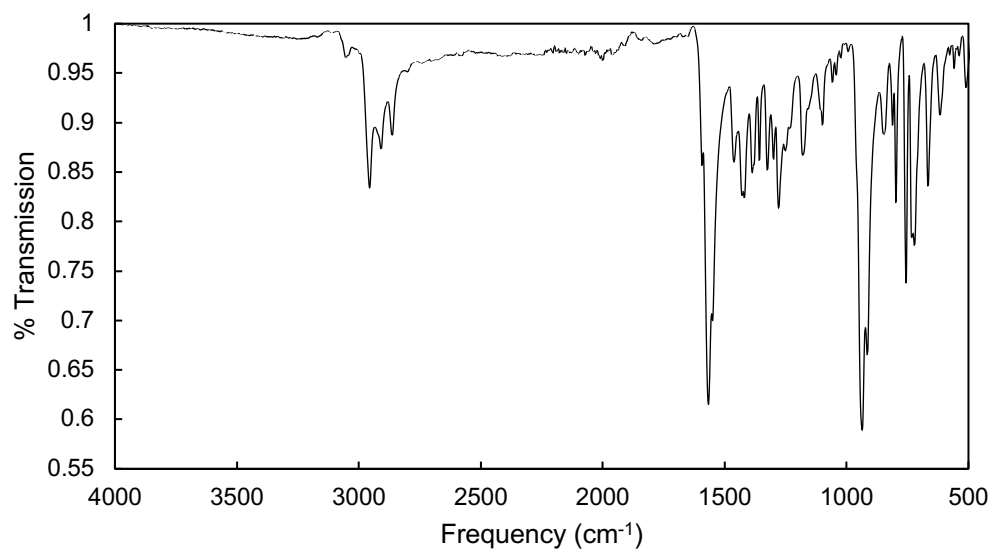

**Figure S37.** FT-IR spectrum of solid **4**.

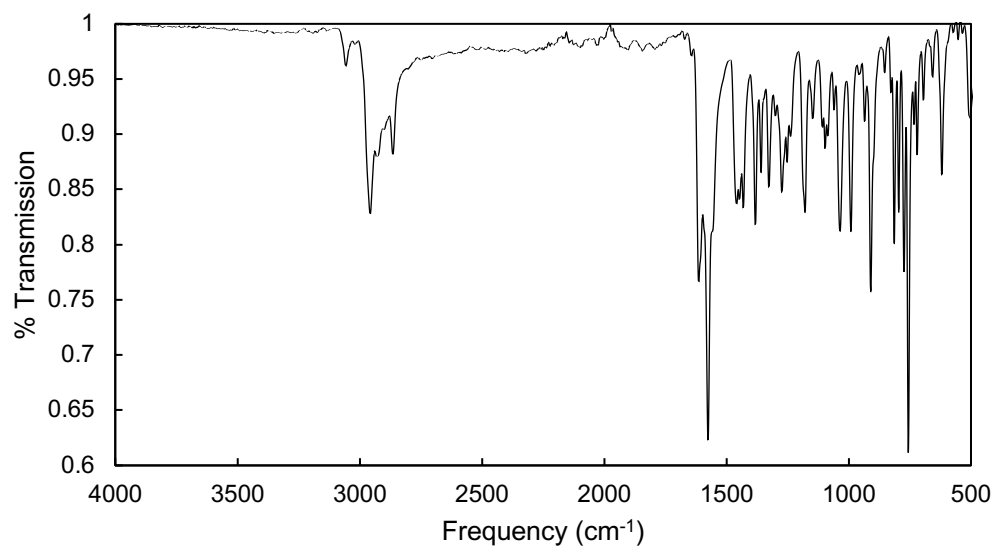

**Figure S38.** FT-IR spectrum of solid **5**.

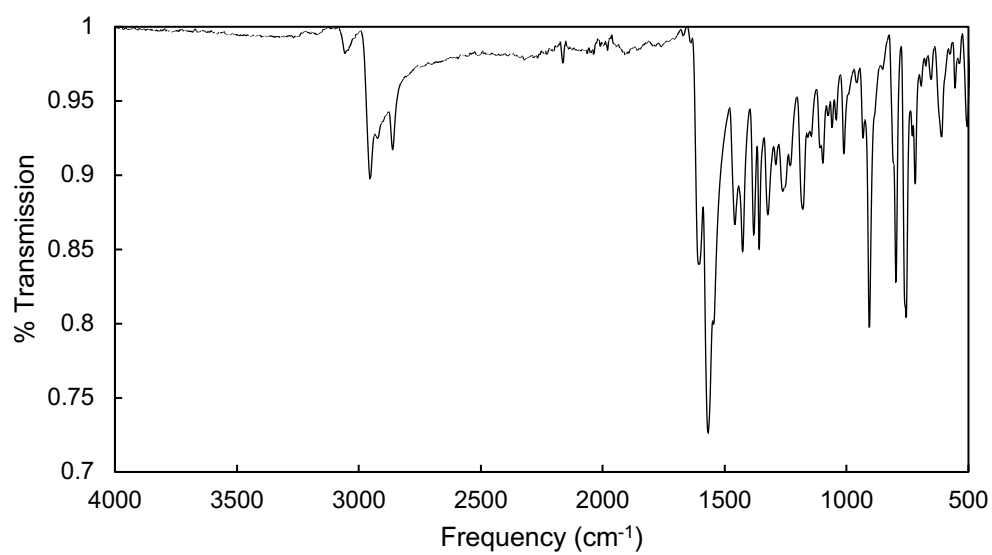

**Figure S39.** FT-IR spectrum of solid **6**.

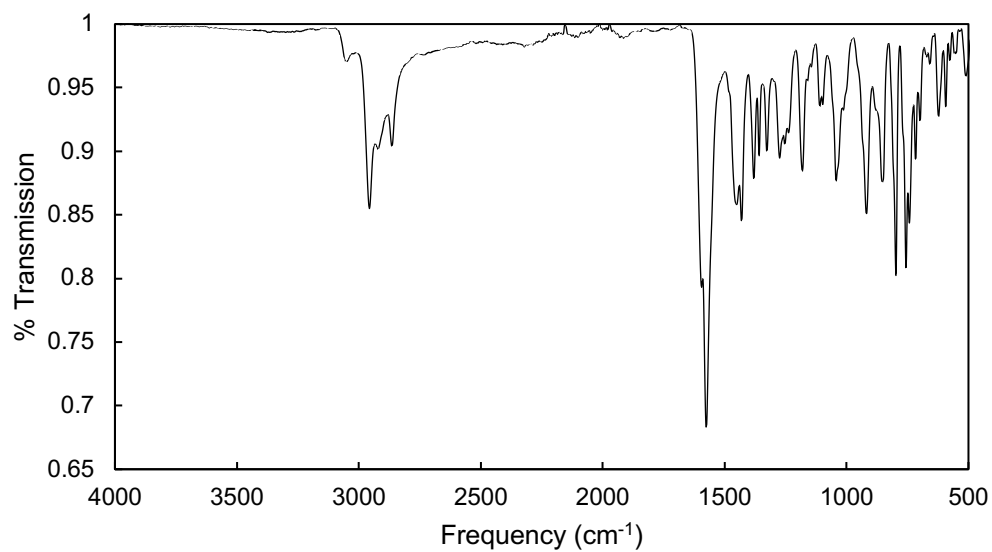

**Figure S40.** FT-IR spectrum of solid **8**.

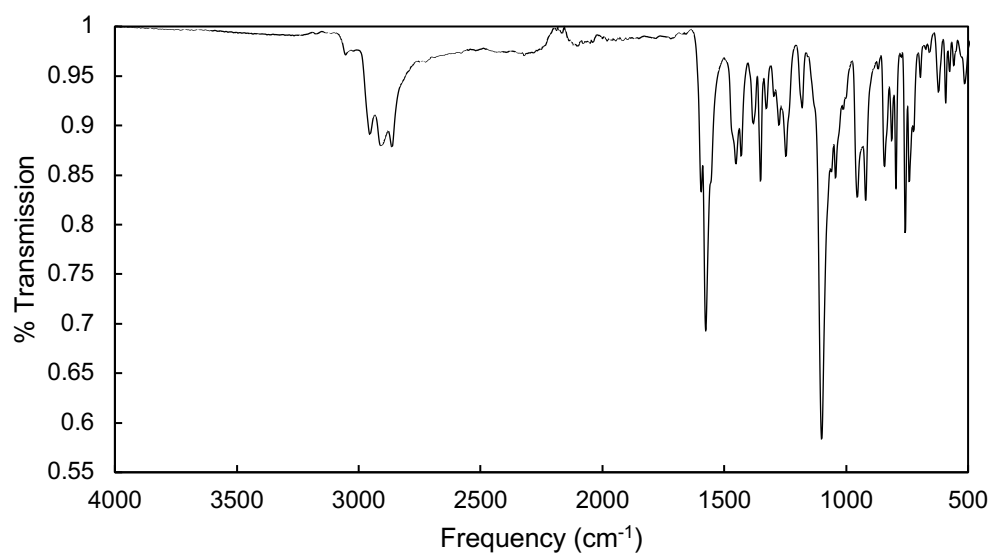

**Figure S41.** FT-IR spectrum of solid **8-crown**.



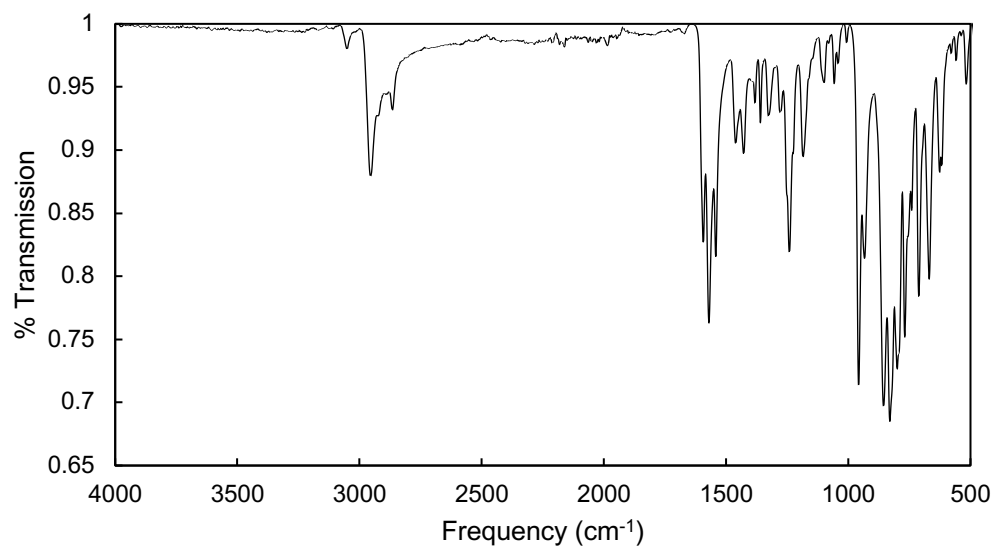

**Figure S42.** FT-IR spectrum of solid **9**.

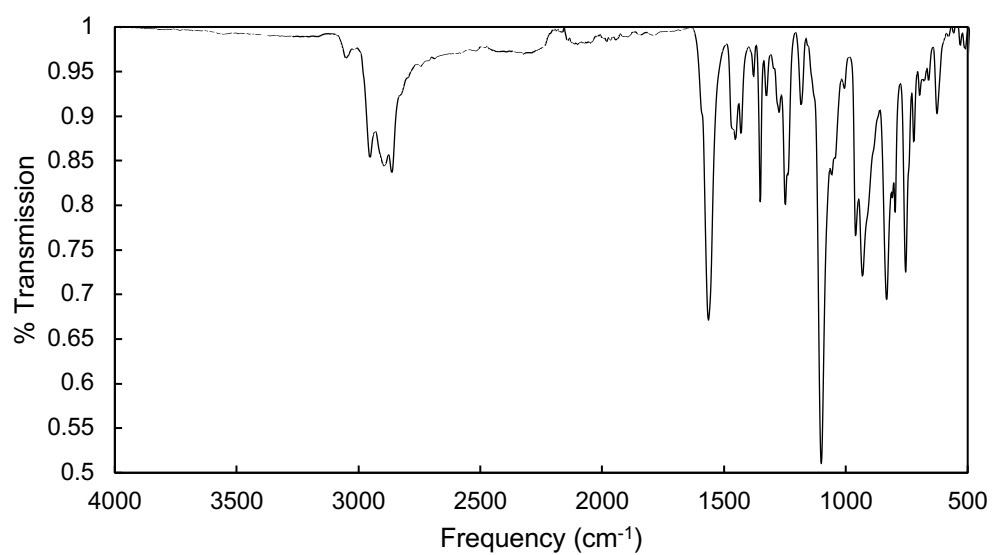

**Figure S43.** FT-IR spectrum of solid **9-crown**.

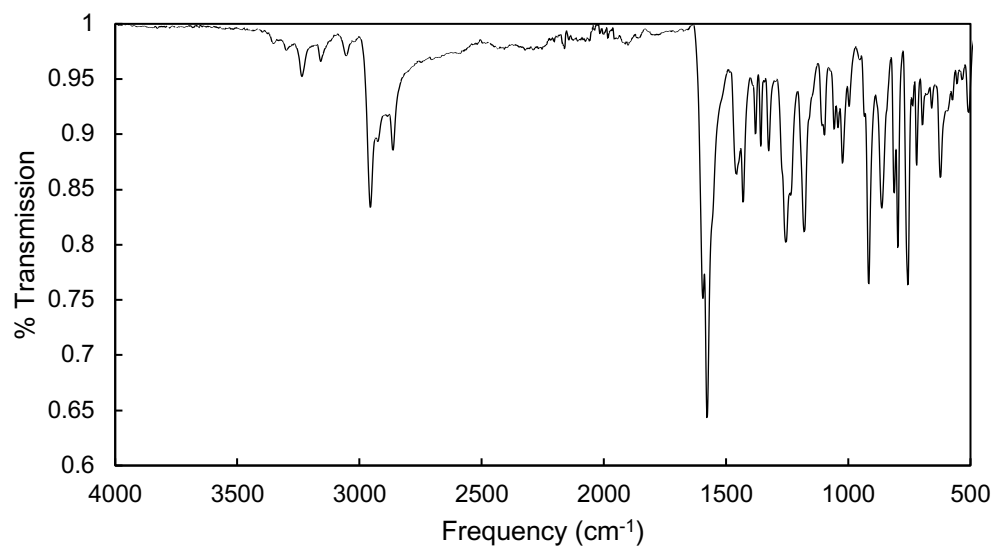

**Figure S44.** FT-IR spectrum of solid **10**.

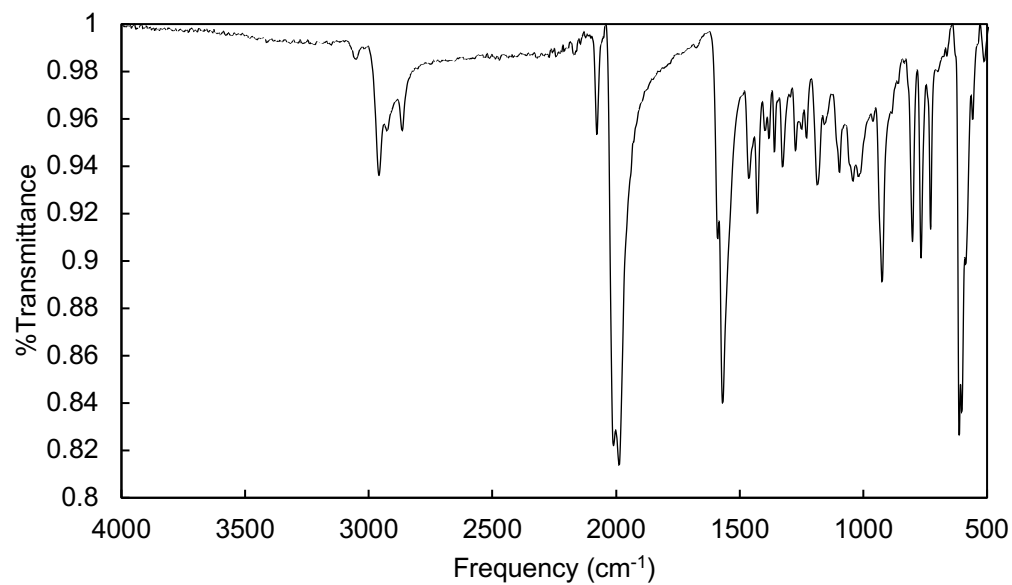

**Figure S45.** FT-IR spectrum of solid **11** showing bands at 2078, 2013, and 1988 cm<sup>-1</sup> that are assigned as CO stretches.

## Mössbauer Spectra

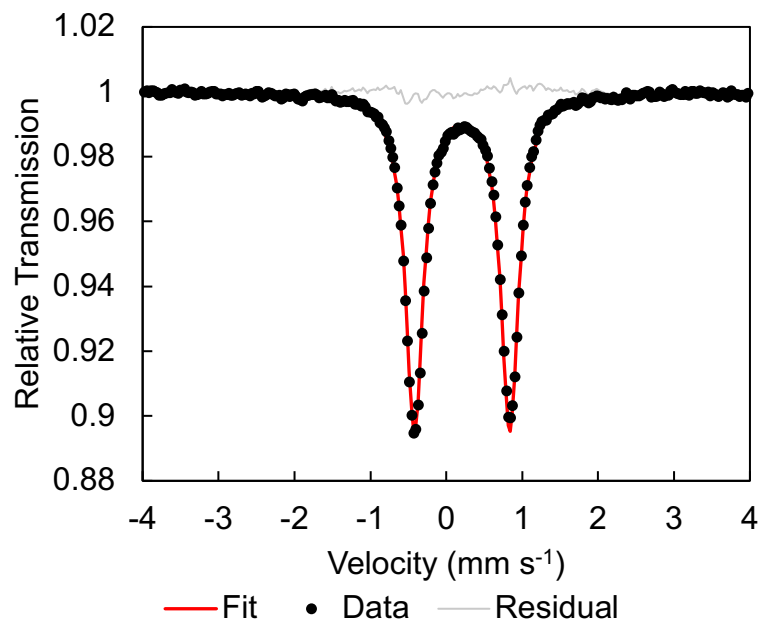

**Figure S46.** Solid state Mössbauer spectrum of **2**, fit to the following parameters:  $\delta = 0.21$  mm/s,  $|\Delta E_Q| = 1.25$  mm/s,  $\Gamma = 0.28$  mm/s.

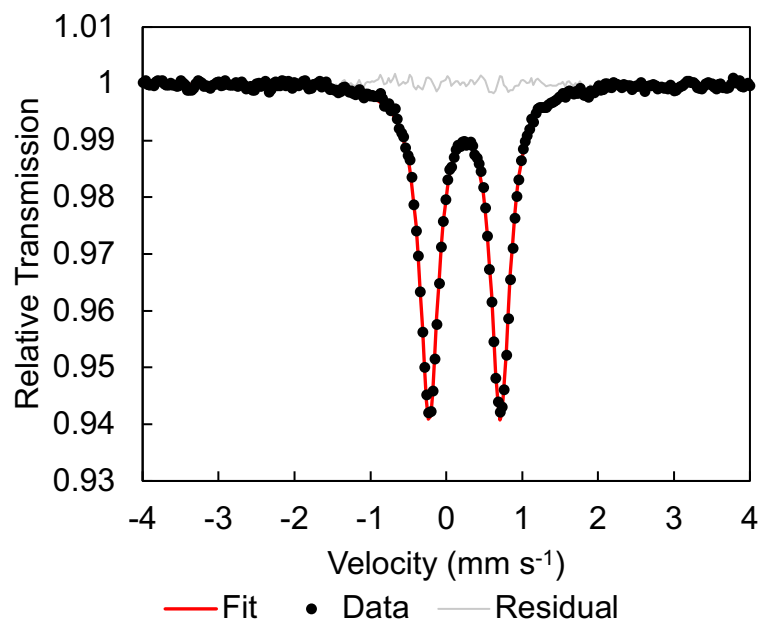

**Figure S47.** Solid state Mössbauer spectrum of **3-Na**, fit to the following parameters:  $\delta = 0.24$  mm/s,  $|\Delta E_Q| = 0.94$  mm/s,  $\Gamma = 0.30$  mm/s.

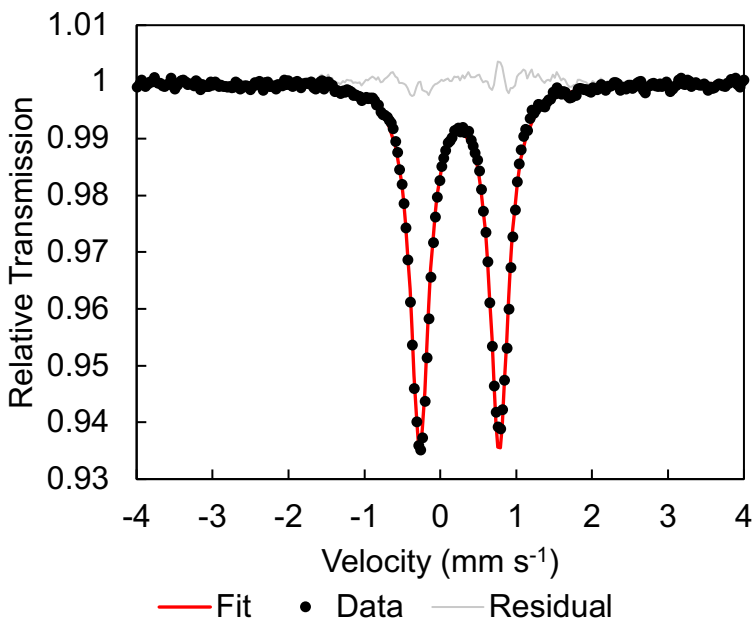

**Figure S48.** Solid state Mössbauer spectrum of **3-K**, fit to the following parameters:  $\delta = 0.25$  mm/s,  $|\Delta E_Q| = 1.05$  mm/s,  $\Gamma = 0.29$  mm/s.

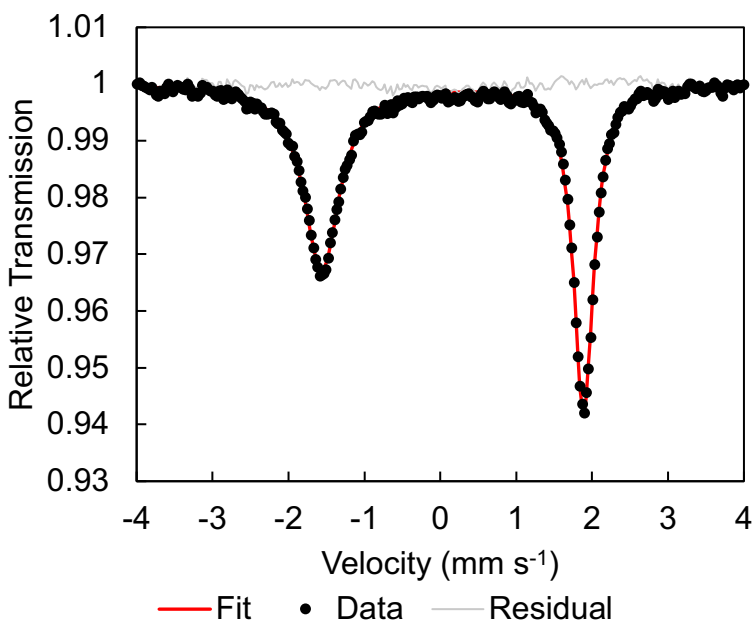

**Figure S49.** Solid state Mössbauer spectrum of **4**, fit to the following parameters:  $\delta = 0.16$  mm/s,  $|\Delta E_Q| = 3.45$  mm/s,  $\Gamma_L = 0.57$  mm/s,  $\Gamma_R = 0.32$  mm/s.

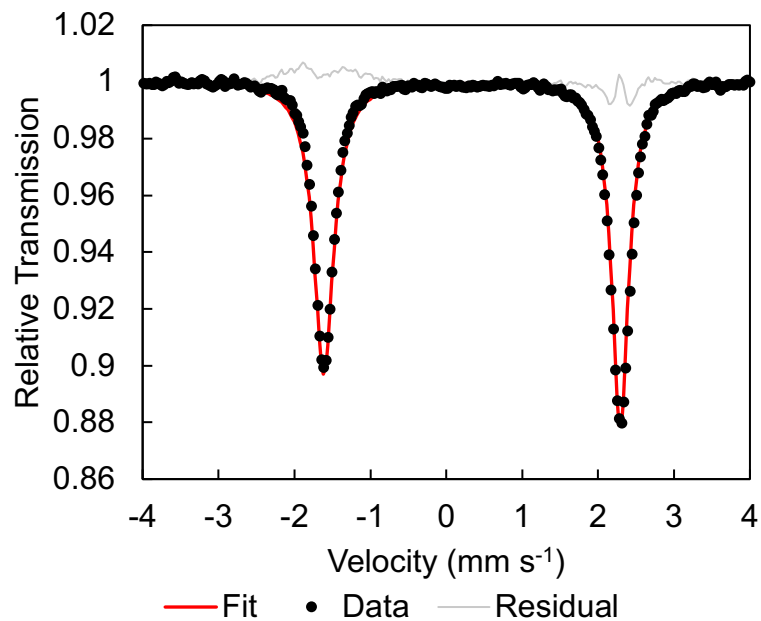

**Figure S50.** Solid state Mössbauer spectrum of **5-Et<sub>2</sub>O**, fit to the following parameters:  $\delta = 0.34$  mm/s,  $|\Delta E_Q| = 3.91$  mm/s,  $\Gamma_L = 0.32$  mm/s,  $\Gamma_R = 0.27$  mm/s.

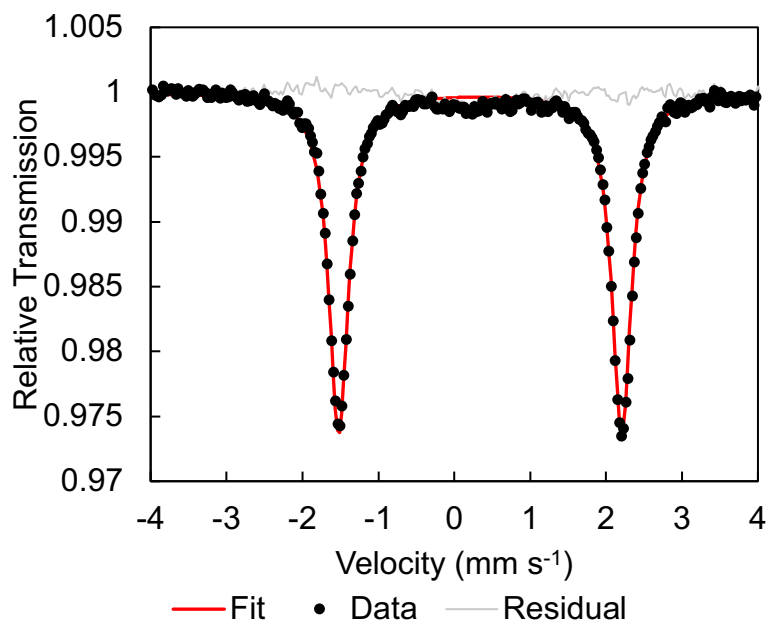

**Figure S51.** Solid state Mössbauer spectrum of **5-THF**, fit to the following parameters:  $\delta = 0.34$  mm/s,  $|\Delta E_Q| = 3.73$  mm/s,  $\Gamma = 0.31$  mm/s.

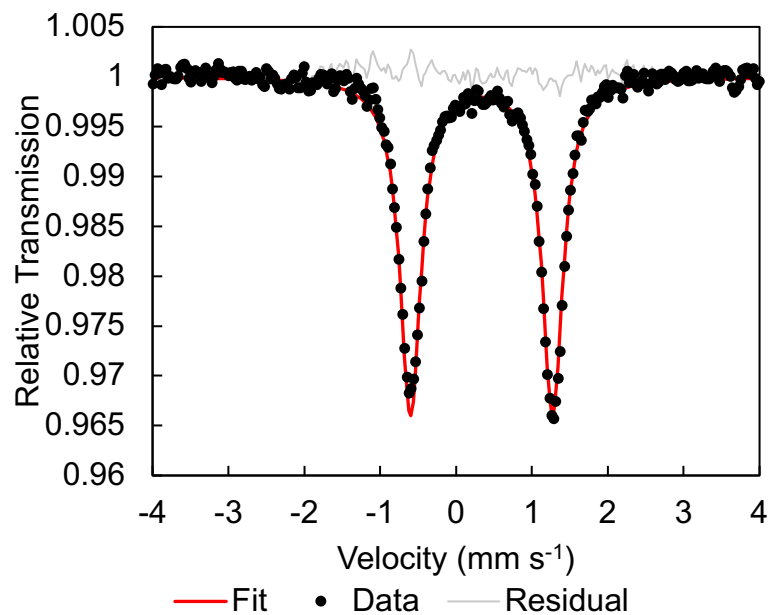

**Figure S52.** Solid state Mössbauer spectrum of **6**, fit to the following parameters:  $\delta = 0.34$  mm/s,  $|\Delta E_Q| = 1.87$  mm/s,  $\Gamma = 0.33$  mm/s.

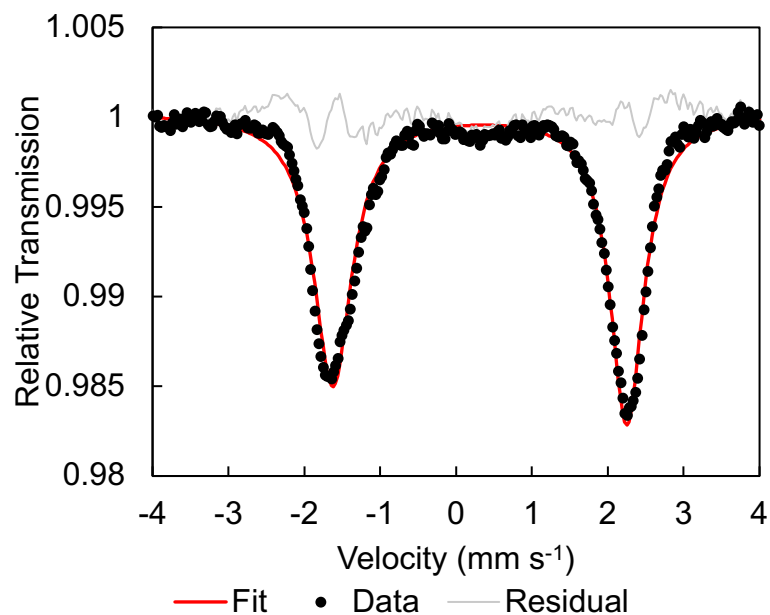

**Figure S53.** Solid state Mössbauer spectrum of **8**, fit to the following parameters:  $\delta = 0.31$  mm/s,  $|\Delta E_Q| = 3.88$  mm/s,  $\Gamma_L = 0.61$  mm/s,  $\Gamma_R = 0.53$  mm/s.

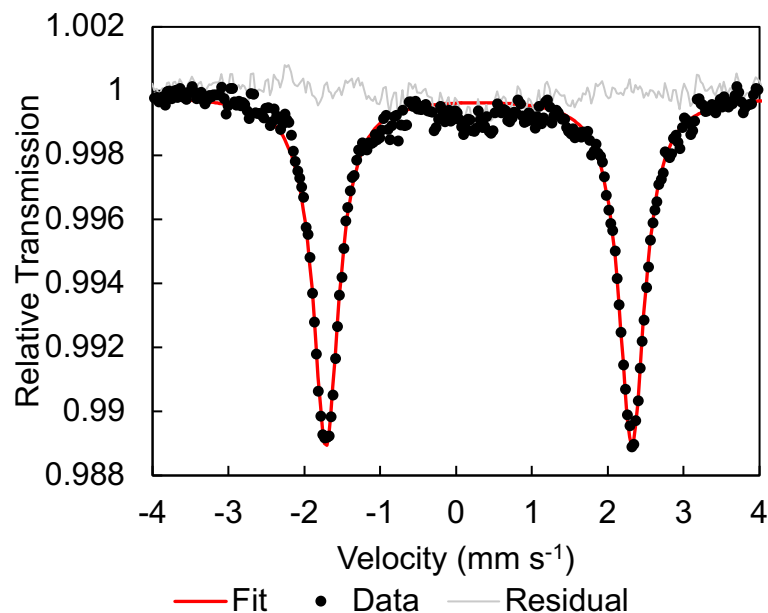

**Figure S54.** Solid state Mössbauer spectrum of **8-crown**, fit to the following parameters:  $\delta = 0.30$  mm/s,  $|\Delta E_Q| = 4.03$  mm/s,  $\Gamma = 0.41$  mm/s.

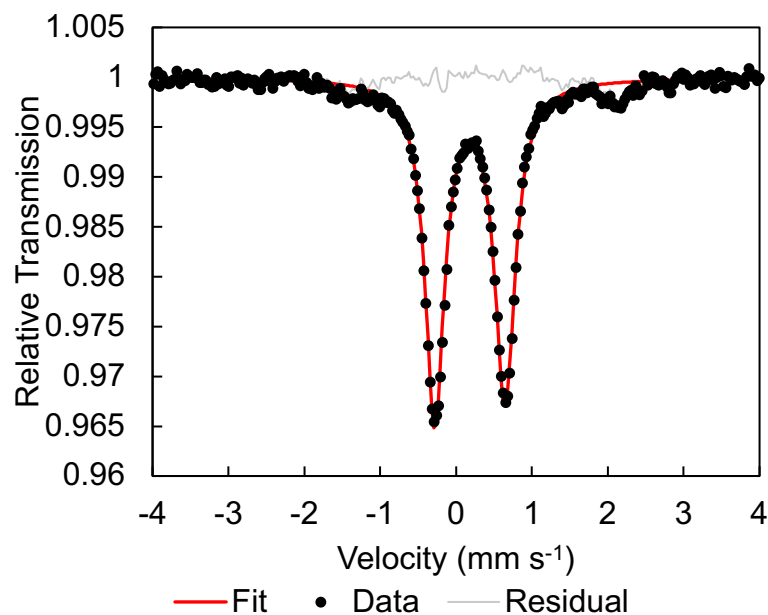

**Figure S55.** Solid state Mössbauer spectrum of **9**, fit to the following parameters:  $\delta = 0.18$  mm/s,  $|\Delta E_Q| = 0.93$  mm/s,  $\Gamma_L = 0.30$  mm/s,  $\Gamma_R = 0.33$  mm/s. There is a 4% impurity with parameter corresponding to the starting material, **5-Et<sub>2</sub>O**.

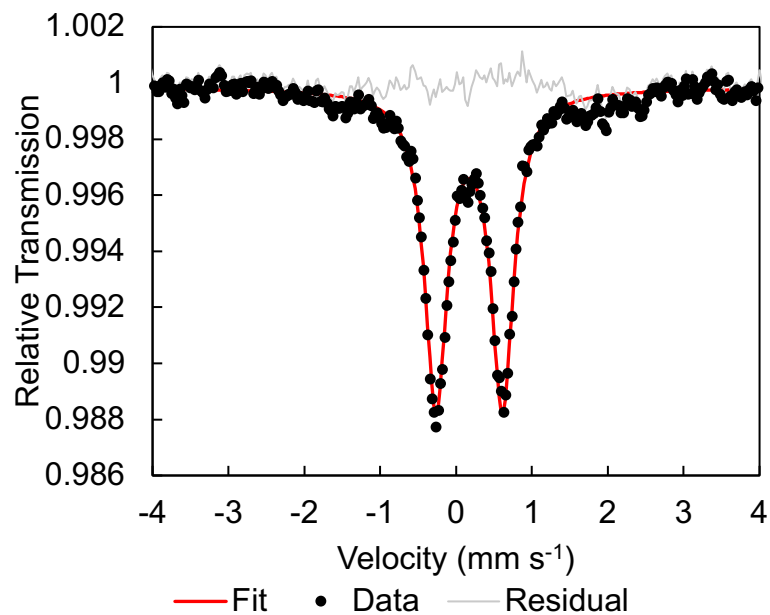

**Figure S56.** Solid state Mössbauer spectrum of **9-crown**, fit to the following parameters:  $\delta = 0.17$  mm/s,  $|\Delta E_Q| = 0.88$  mm/s,  $\Gamma = 0.36$  mm/s.

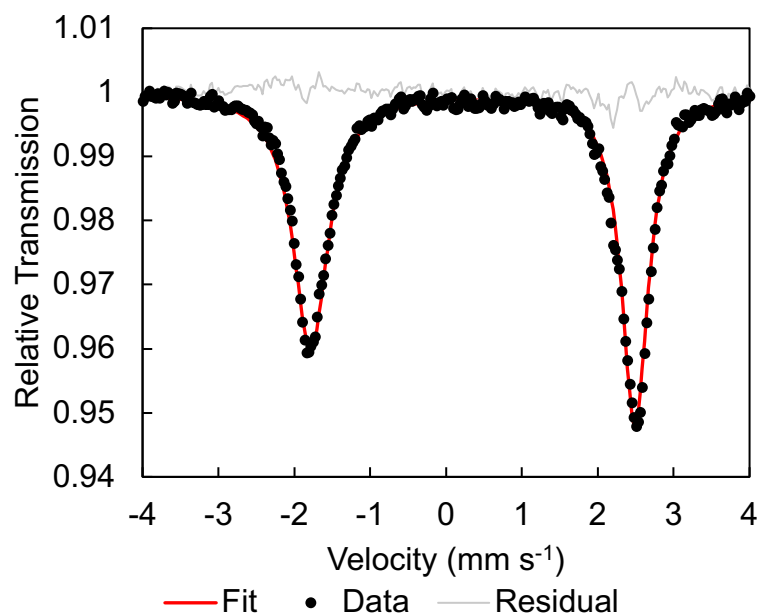

**Figure S57.** Solid state Mössbauer spectrum of **10**, fit to the following parameters:  $\delta = 0.35$  mm/s,  $|\Delta E_Q| = 4.28$  mm/s,  $\Gamma_L = 0.55$  mm/s,  $\Gamma_R = 0.43$  mm/s.



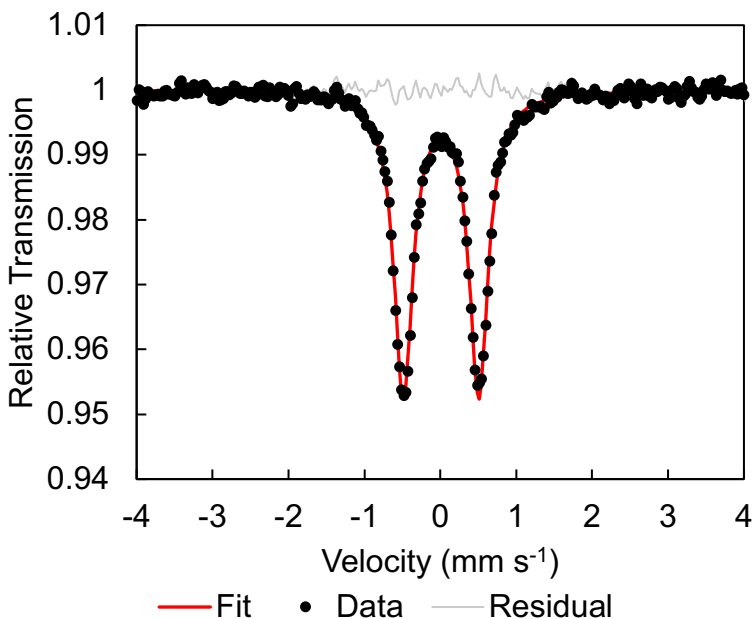

**Figure S58.** Solid state Mössbauer spectrum of **11**, fit to the following parameters:  $\delta = 0.01$  mm/s,  $|\Delta E_Q| = 0.99$  mm/s,  $\Gamma = 0.30$  mm/s.

### Cyclic Voltammograms

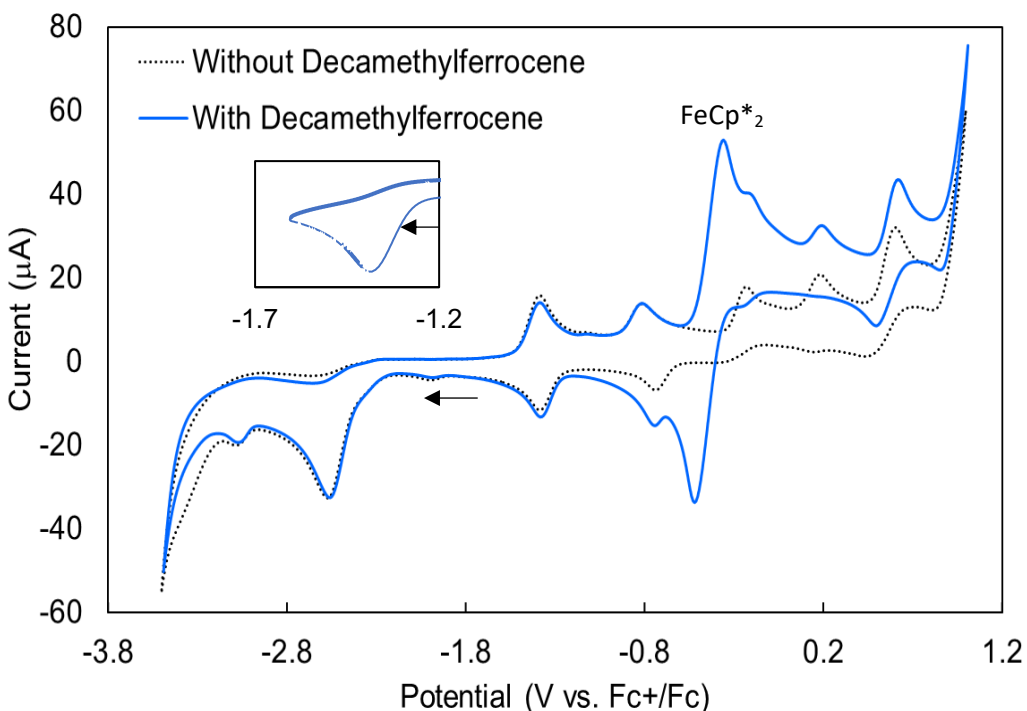

**Figure S59.** Cyclic voltammogram of **2** in THF with and without decamethylferrocene at a scan rate of 100 mV/s. Inset shows the CV from  $-1.2$  V to  $-1.7$  V when the potential is not swept below  $-1.6$  V, showing that the oxidative feature observed in the full-solvent-window spectrum is not present. The internal reference  $\text{FeCp}^*_2$  is set to a potential of  $-0.440$  V vs.  $\text{FcP}_2$ .<sup>8</sup>

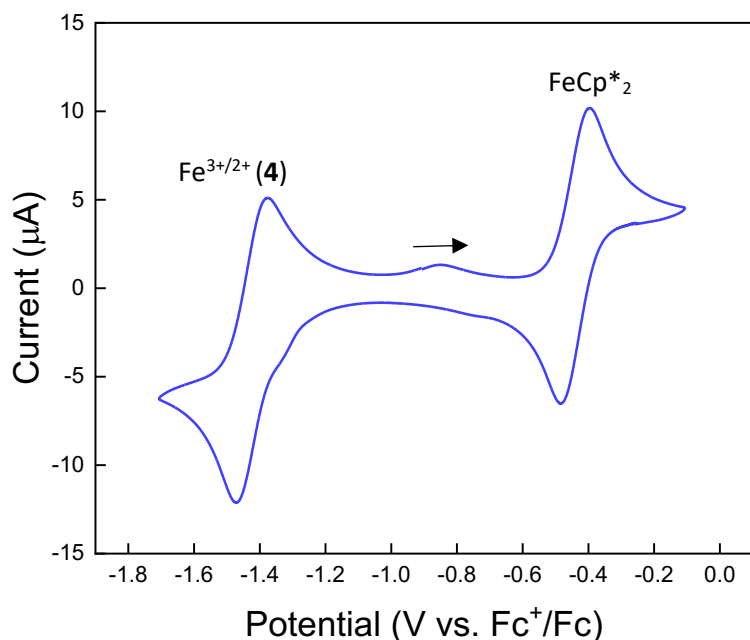

**Figure S60.** Cyclic voltammogram of **4** in THF showing a redox wave at  $E_{1/2} = -1.424$  V vs.  $\text{Fc}^+/\text{Fc}$  with  $\Delta E_p = 97$  mV at a scan rate of 20 mV/s. The internal reference  $\text{FeCp}^*_2$  is set to a potential of  $-0.440$  V vs.  $\text{FeCp}_2$ .<sup>8</sup>

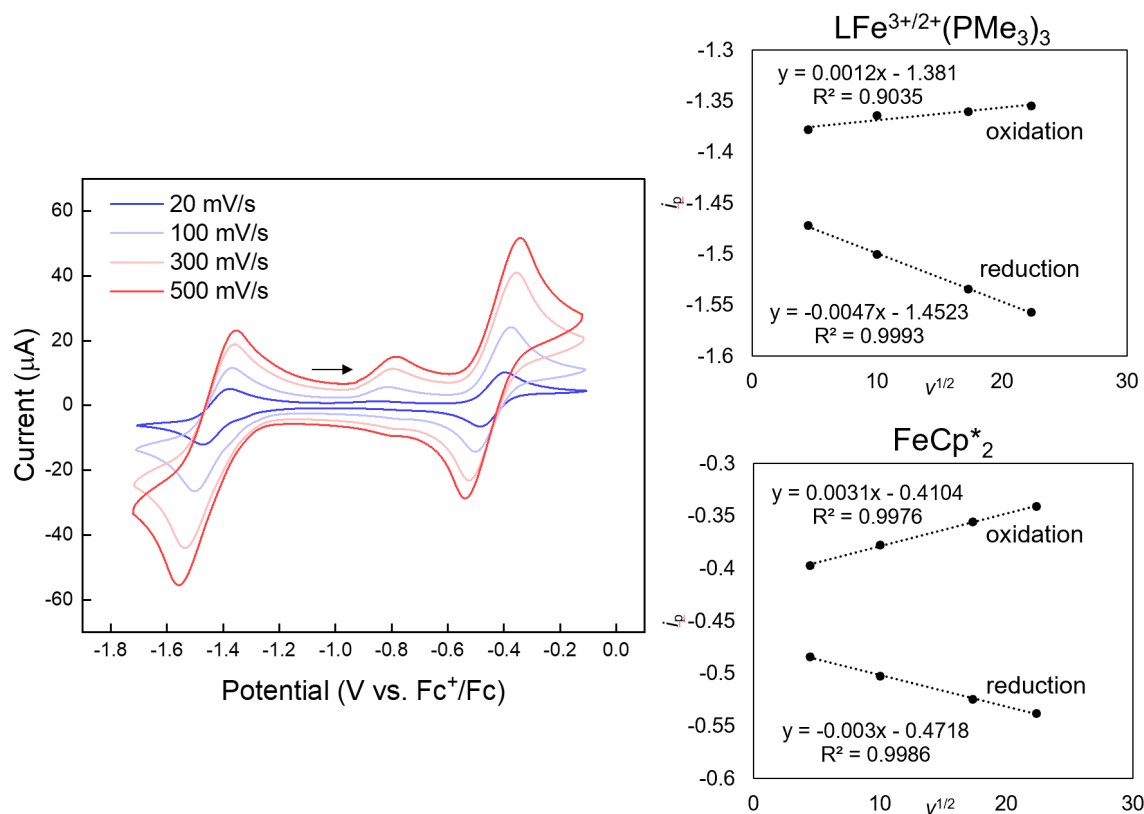

**Figure S61.** Scan rate dependence for **4** in THF showing linear relationship between  $v^{1/2}$  and peak current.

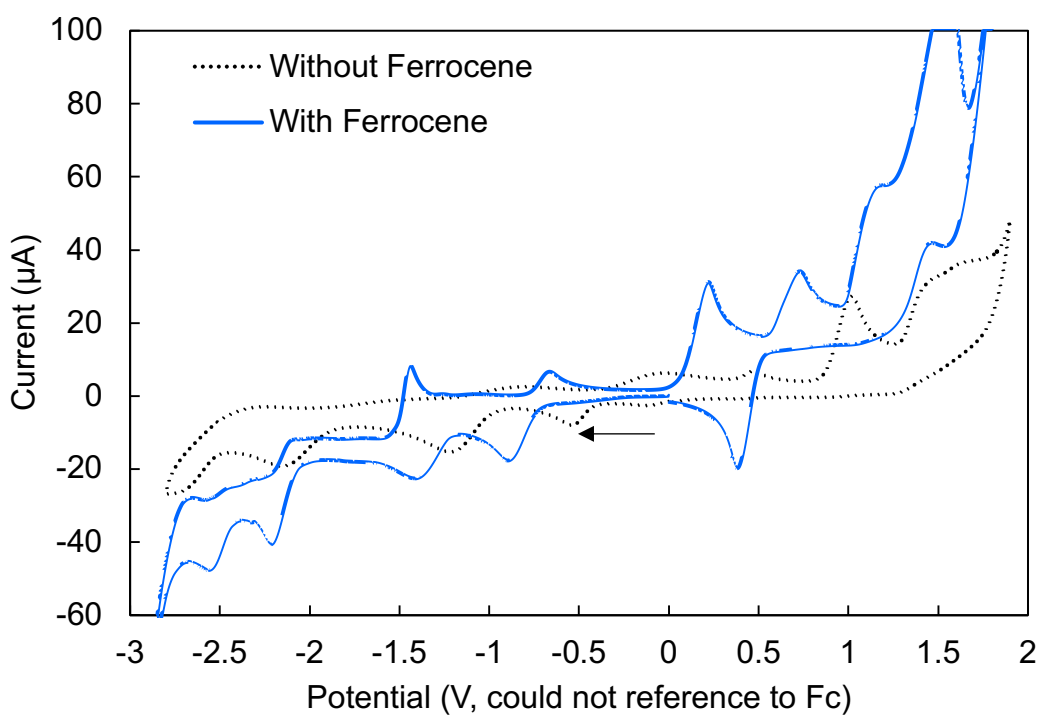

**Figure S62.** Cyclic voltammogram of **5-Solv** in THF with and without ferrocene at a scan rate of 100 mV/s.

## SQUID Magnetometry Data

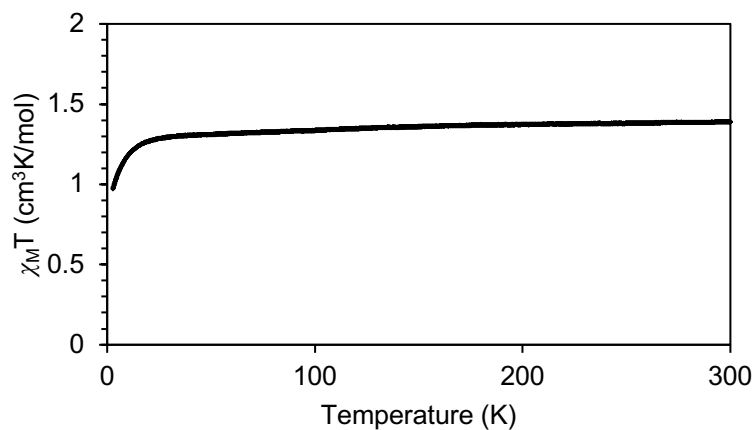

**Figure S63.** Solid-state temperature-dependent dc magnetic susceptibility of thiolate complex **8** under a 5000 Oe applied field.

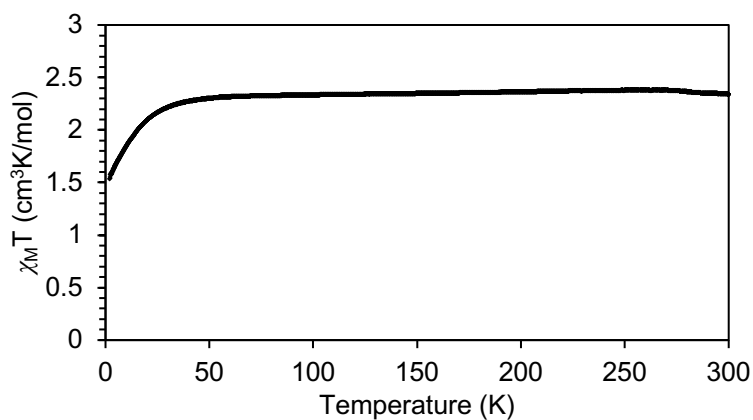

**Figure S64.** Solid-state temperature-dependent dc magnetic susceptibility of amide complex **9** under a 5000 Oe applied field.

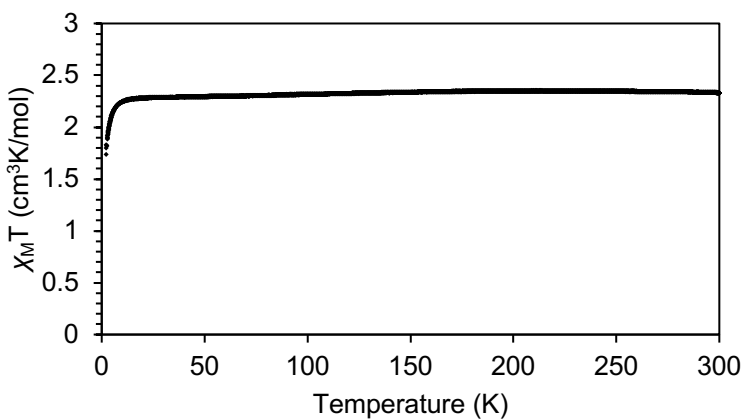

**Figure S65.** Solid-state temperature-dependent dc magnetic susceptibility of ammonia complex **10** under a 5000 Oe applied field.

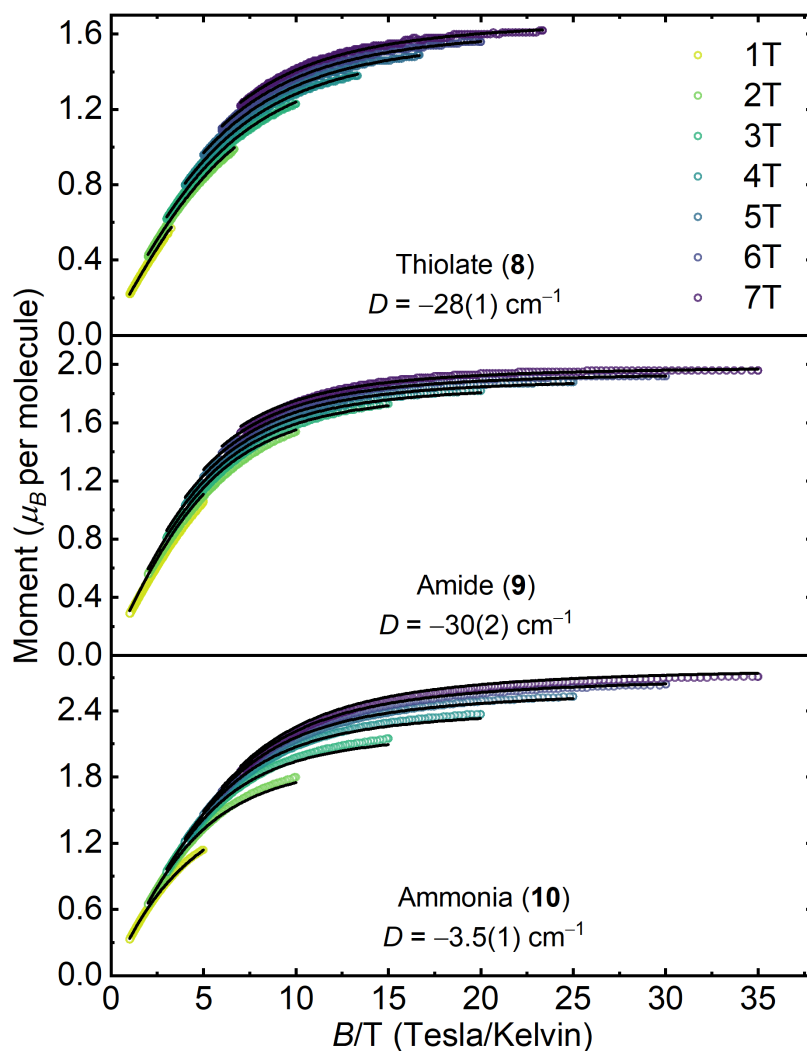

**Figure S66.** Variable-temperature magnetization data for complexes **8**, **9**, and **10** at fields of 1 T to 7 T. Data are shown as open circles and fits are shown as black traces. Temperature range for **8**: 3 K to 10 K. Temperature range for **9** and **10**: 2 K to 10 K. These temperatures were sufficient to adequately estimate the  $D$  values.

## X-Ray Crystallographic Data

### HLFe<sup>II</sup>(PMe<sub>3</sub>)<sub>3</sub> (**2**)

Low-temperature diffraction data ( $\omega$ -scans) were collected on a Rigaku MicroMax-007HF diffractometer coupled to a Dectris Pilatus3R detector with Mo K $\alpha$  ( $\lambda$  = 0.71073 Å). The diffraction images were processed and scaled using Rigaku Oxford Diffraction software (CrysAlisPro; Rigaku OD: The Woodlands, TX, 2015). The structure was solved with SHELXT and was refined against  $F^2$  on all data by full-matrix least squares with SHELXL.<sup>11</sup> All non-hydrogen atoms were refined anisotropically. Hydrogen atoms were included in the model at geometrically calculated positions and refined using a riding model. The isotropic displacement parameters of all hydrogen atoms were fixed to 1.2 times the U value of the atoms to which they are linked (1.5 times for methyl groups). One isopropyl group is disordered over two positions. The site occupancy distribution was freely refined to a converged value near 0.85/0.15. The chemically equivalent 1,2 and 1,3 C-C distances were restrained to be similar. The protons on N12 and N13 were modeled as disordered at 0.50 occupancy. CCDC number 2118692 contains the supplementary crystallographic data for **2**.

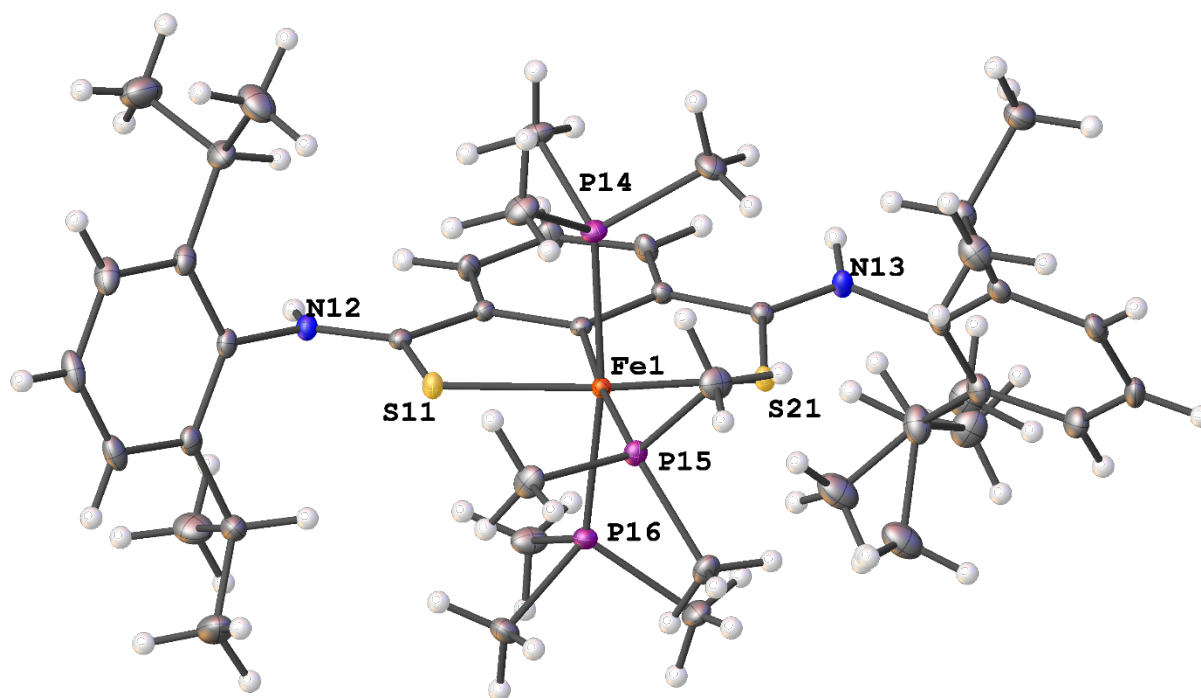

**Figure S67.** The partial numbering scheme of **2** with 50% thermal ellipsoid probability levels. The hydrogen atoms are shown as circles for clarity.

**Table S1.** Crystal data and structure refinement for **2**.

|                                   |                                                                                 |                 |
|-----------------------------------|---------------------------------------------------------------------------------|-----------------|
| Identification code               | 007c-18063                                                                      |                 |
| CCDC code                         | 2118692                                                                         |                 |
| Empirical formula                 | C <sub>41</sub> H <sub>65</sub> Fe N <sub>2</sub> P <sub>3</sub> S <sub>2</sub> |                 |
| Formula weight                    | 798.83                                                                          |                 |
| Temperature                       | 93(2) K                                                                         |                 |
| Wavelength                        | 0.71073 Å                                                                       |                 |
| Crystal system                    | Triclinic                                                                       |                 |
| Space group                       | P-1                                                                             |                 |
| Unit cell dimensions              | a = 10.4796(3) Å                                                                | α = 89.181(2)°. |
|                                   | b = 13.8527(3) Å                                                                | β = 73.053(2)°. |
|                                   | c = 16.7072(4) Å                                                                | γ = 68.946(2)°. |
| Volume                            | 2154.06(10) Å <sup>3</sup>                                                      |                 |
| Z                                 | 2                                                                               |                 |
| Density (calculated)              | 1.232 g/cm <sup>3</sup>                                                         |                 |
| Absorption coefficient            | 0.588 mm <sup>-1</sup>                                                          |                 |
| F(000)                            | 856                                                                             |                 |
| Crystal size                      | 0.100 x 0.100 x 0.040 mm <sup>3</sup>                                           |                 |
| Crystal color and habit           | Black Block                                                                     |                 |
| Diffractometer                    | Dectris Pilatus 3R                                                              |                 |
| Theta range for data collection   | 2.855 to 31.602°.                                                               |                 |
| Index ranges                      | -15 ≤ h ≤ 14, -19 ≤ k ≤ 18, -24 ≤ l ≤ 23                                        |                 |
| Reflections collected             | 52714                                                                           |                 |
| Independent reflections           | 12264 [R(int) = 0.0455]                                                         |                 |
| Observed reflections (I > 2σ(I))  | 10649                                                                           |                 |
| Completeness to theta = 25.242°   | 99.9 %                                                                          |                 |
| Absorption correction             | Semi-empirical from equivalents                                                 |                 |
| Max. and min. transmission        | 1.00000 and 0.68850                                                             |                 |
| Solution method                   | SHELXT-2014/5 (Sheldrick, 2014)                                                 |                 |
| Refinement method                 | SHELXL-2014/7 (Sheldrick, 2014)                                                 |                 |
| Data / restraints / parameters    | 12264 / 11 / 468                                                                |                 |
| Goodness-of-fit on F <sup>2</sup> | 1.020                                                                           |                 |
| Final R indices [I > 2σ(I)]       | R1 = 0.0318, wR2 = 0.0719                                                       |                 |
| R indices (all data)              | R1 = 0.0400, wR2 = 0.0750                                                       |                 |
| Largest diff. peak and hole       | 0.440 and -0.550 e.Å <sup>-3</sup>                                              |                 |

### **LFe<sup>III</sup>(PMe<sub>3</sub>)<sub>3</sub> (4)**

Low-temperature diffraction data ( $\omega$ -scans) were collected on a Rigaku SCX Mini diffractometer coupled to a Rigaku Mercury275R CCD with Mo K $\alpha$  radiation ( $\lambda = 0.71073$  Å). The diffraction images were processed and scaled using Rigaku Oxford Diffraction software (CrysAlisPro; Rigaku OD: The Woodlands, TX, 2015). The structure was solved with SHELXT and was refined against  $F^2$  on all data by full-matrix least squares with SHELXL.<sup>11</sup> All non-hydrogen atoms were refined anisotropically. Hydrogen atoms were included in the model at geometrically calculated positions and refined using a riding model. The isotropic displacement parameters of all hydrogen atoms were fixed to 1.2 times the U value of the atoms to which they are linked (1.5 times for methyl groups). The methyl on one toluene is disordered over two positions. The site occupancies were freely refined and fixed near their converged values of 0.75/0.25. The hydrogen atoms were generated to reflect the disordered positions. No additional restraints were needed. The program SQUEEZE was used to compensate for the contribution of disordered solvents contained in voids within the crystal lattice from the diffraction intensities. This procedure was applied to the data file and the submitted model is based on the solvent removed data. Based on the total electron density found in the voids (339 e/Å<sup>3</sup>), it is likely that ~8 toluene molecules are present in the unit cell. CCDC number 2118693 contains the supplementary crystallographic data for **4**.

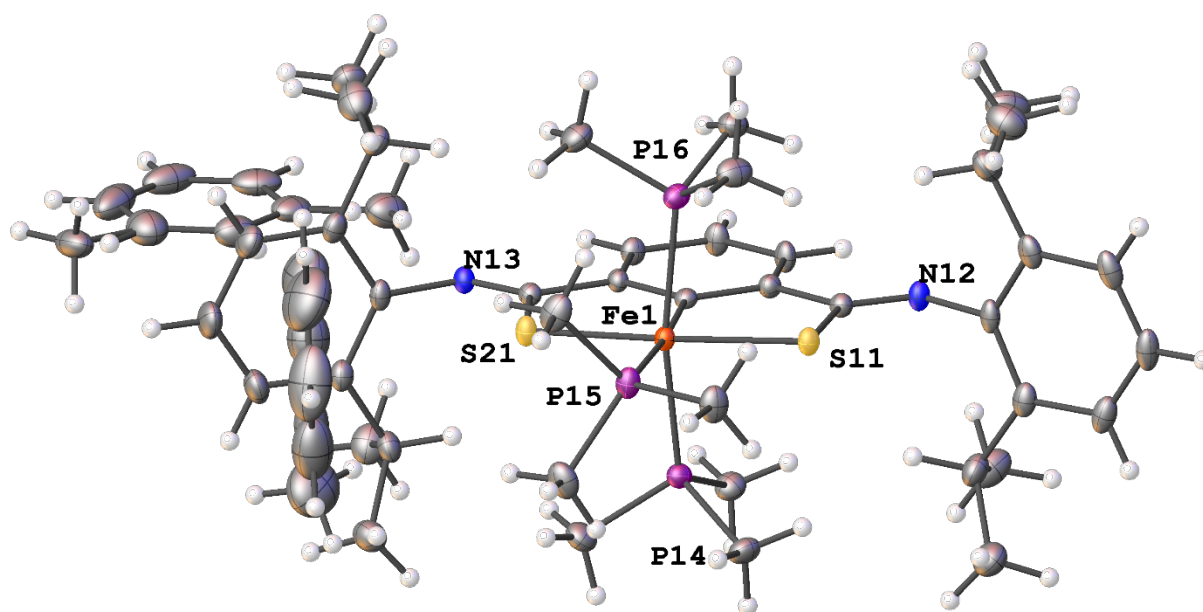

**Figure S68.** The partial numbering scheme of **4** with 50% thermal ellipsoid probability levels. The hydrogen atoms are shown as circles for clarity.



**Table S2.** Crystal data and structure refinement for **4**.

|                                   |                                                                                 |                  |
|-----------------------------------|---------------------------------------------------------------------------------|------------------|
| Identification code               | mini-18057                                                                      |                  |
| CCDC code                         | 2118693                                                                         |                  |
| Empirical formula                 | C <sub>55</sub> H <sub>80</sub> Fe N <sub>2</sub> P <sub>3</sub> S <sub>2</sub> |                  |
| Formula weight                    | 982.09                                                                          |                  |
| Temperature                       | 93(2) K                                                                         |                  |
| Wavelength                        | 0.71073 Å                                                                       |                  |
| Crystal system                    | Monoclinic                                                                      |                  |
| Space group                       | I2/a                                                                            |                  |
| Unit cell dimensions              | a = 29.971(3) Å                                                                 | α = 90°.         |
|                                   | b = 13.4638(3) Å                                                                | β = 100.515(7)°. |
|                                   | c = 29.0781(16) Å                                                               | γ = 90°.         |
| Volume                            | 11536.8(12) Å <sup>3</sup>                                                      |                  |
| Z                                 | 8                                                                               |                  |
| Density (calculated)              | 1.131 g/cm <sup>3</sup>                                                         |                  |
| Absorption coefficient            | 0.451 mm <sup>-1</sup>                                                          |                  |
| F(000)                            | 4216                                                                            |                  |
| Crystal size                      | 0.300 x 0.200 x 0.200 mm <sup>3</sup>                                           |                  |
| Crystal color and habit           | Red Block                                                                       |                  |
| Diffractometer                    | Rigaku Mercury275R CCD                                                          |                  |
| Theta range for data collection   | 1.663 to 27.485°.                                                               |                  |
| Index ranges                      | -38 ≤ h ≤ 38, -17 ≤ k ≤ 17, -37 ≤ l ≤ 37                                        |                  |
| Reflections collected             | 99803                                                                           |                  |
| Independent reflections           | 13218 [R(int) = 0.0634]                                                         |                  |
| Observed reflections (I > 2σ(I))  | 9553                                                                            |                  |
| Completeness to theta = 25.242°   | 99.8 %                                                                          |                  |
| Absorption correction             | Semi-empirical from equivalents                                                 |                  |
| Max. and min. transmission        | 1.00000 and 0.90990                                                             |                  |
| Solution method                   | SHELXT-2014/5 (Sheldrick, 2014)                                                 |                  |
| Refinement method                 | SHELXL-2014/7 (Sheldrick, 2014)                                                 |                  |
| Data / restraints / parameters    | 13218 / 0 / 597                                                                 |                  |
| Goodness-of-fit on F <sup>2</sup> | 1.045                                                                           |                  |
| Final R indices [I > 2σ(I)]       | R1 = 0.0424, wR2 = 0.1034                                                       |                  |
| R indices (all data)              | R1 = 0.0670, wR2 = 0.1167                                                       |                  |
| Largest diff. peak and hole       | 0.471 and -0.336 e.Å <sup>-3</sup>                                              |                  |

**[LFe<sup>III</sup>(THF)]<sub>2</sub> (5-THF)**

Low-temperature diffraction data ( $\omega$ -scans) were collected on a Rigaku MicroMax-007HF diffractometer coupled to a Dectris Pilatus3R detector with Mo K $\alpha$  ( $\lambda = 0.71073$  Å). The diffraction images were processed and scaled using Rigaku Oxford Diffraction software (CrysAlisPro; Rigaku OD: The Woodlands, TX, 2015). The structure was solved with SHELXT and was refined against  $F^2$  on all data by full-matrix least squares with SHELXL.<sup>11</sup> All non-hydrogen atoms were refined anisotropically. Hydrogen atoms were included in the model at geometrically calculated positions and refined using a riding model. The isotropic displacement parameters of all hydrogen atoms were fixed to 1.2 times the U value of the atoms to which they are linked (1.5 times for methyl groups). There is likely some disorder in both the isopropyl group and coordinating THF solvent. The chemical model which would account for this density is not obvious, so the density was left unmodeled. Assuming carbon makes up some of the disordered model, free refinement of the disordered sites converged at a site occupancy of ~10% occupancy or less. CCDC number 2118695 contains the supplementary crystallographic data for **5-THF**.

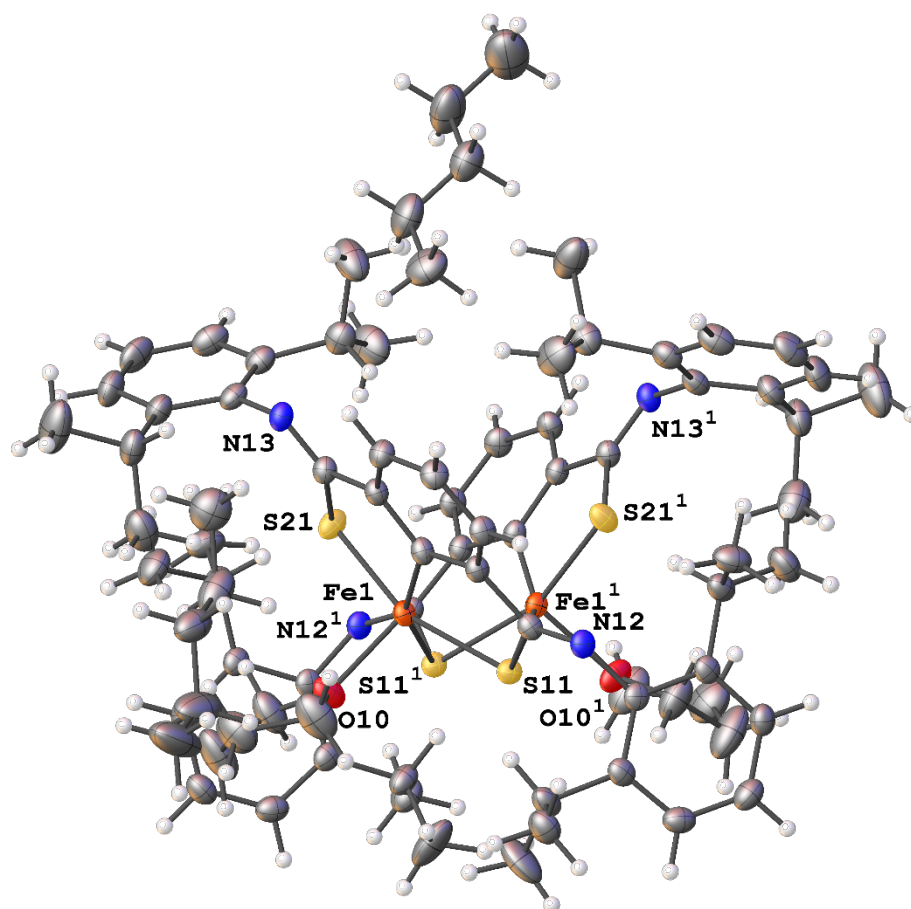

**Figure S69.** A partial numbering scheme of **5-THF** with 50% thermal ellipsoid probability levels. The hydrogen atoms are shown as circles for clarity. Only the asymmetric unit is labeled, and symmetry equivalent atoms are generated with the operator  $(1 - x, y, \frac{1}{2} - z)$ .

**Table S3.** Crystal data and structure refinement for **5-THF**.

|                                   |                                                                                               |                             |
|-----------------------------------|-----------------------------------------------------------------------------------------------|-----------------------------|
| Identification code               | 007c-18076                                                                                    |                             |
| CCDC code                         | 2118695                                                                                       |                             |
| Empirical formula                 | C <sub>92</sub> H <sub>136</sub> Fe <sub>2</sub> N <sub>4</sub> O <sub>2</sub> S <sub>4</sub> |                             |
| Formula weight                    | 1569.98                                                                                       |                             |
| Temperature                       | 93(2) K                                                                                       |                             |
| Wavelength                        | 0.71073 Å                                                                                     |                             |
| Crystal system                    | Monoclinic                                                                                    |                             |
| Space group                       | C2/c                                                                                          |                             |
| Unit cell dimensions              | a = 20.0317(15) Å                                                                             | $\alpha = 90^\circ$ .       |
|                                   | b = 19.1179(19) Å                                                                             | $\beta = 90.551(5)^\circ$ . |
|                                   | c = 23.4874(13) Å                                                                             | $\gamma = 90^\circ$ .       |
| Volume                            | 8994.4(12) Å <sup>3</sup>                                                                     |                             |
| Z                                 | 4                                                                                             |                             |
| Density (calculated)              | 1.159 g/cm <sup>3</sup>                                                                       |                             |
| Absorption coefficient            | 0.462 mm <sup>-1</sup>                                                                        |                             |
| F(000)                            | 3392                                                                                          |                             |
| Crystal size                      | 0.200 x 0.100 x 0.020 mm <sup>3</sup>                                                         |                             |
| Crystal color and habit           | Black Plate                                                                                   |                             |
| Diffractometer                    | Dectris Pilatus 3R                                                                            |                             |
| Theta range for data collection   | 2.946 to 27.481°.                                                                             |                             |
| Index ranges                      | -24 ≤ h ≤ 26, -24 ≤ k ≤ 24, -30 ≤ l ≤ 30                                                      |                             |
| Reflections collected             | 83677                                                                                         |                             |
| Independent reflections           | 10291 [R(int) = 0.0774]                                                                       |                             |
| Observed reflections (I > 2σ(I))  | 8297                                                                                          |                             |
| Completeness to theta = 25.242°   | 99.8 %                                                                                        |                             |
| Absorption correction             | Semi-empirical from equivalents                                                               |                             |
| Max. and min. transmission        | 1.00000 and 0.46063                                                                           |                             |
| Solution method                   | SHELXT-2014/5 (Sheldrick, 2014)                                                               |                             |
| Refinement method                 | SHELXL-2014/7 (Sheldrick, 2014)                                                               |                             |
| Data / restraints / parameters    | 10291 / 0 / 486                                                                               |                             |
| Goodness-of-fit on F <sup>2</sup> | 1.043                                                                                         |                             |
| Final R indices [I > 2σ(I)]       | R1 = 0.0521, wR2 = 0.1242                                                                     |                             |
| R indices (all data)              | R1 = 0.0700, wR2 = 0.1413                                                                     |                             |
| Largest diff. peak and hole       | 1.541 and -0.492 e.Å <sup>-3</sup>                                                            |                             |

### [LFe<sup>III</sup>(Et<sub>2</sub>O)]<sub>2</sub> (**5-Et<sub>2</sub>O**)

Low-temperature diffraction data ( $\omega$ -scans) were collected on a Rigaku MicroMax-007HF diffractometer coupled to a Dectris Pilatus3R detector with Mo K $\alpha$  ( $\lambda = 0.71073$  Å). The diffraction images were processed and scaled using Rigaku Oxford Diffraction software (CrysAlisPro; Rigaku OD: The Woodlands, TX, 2015). The structure was solved with SHELXT and was refined against  $F^2$  on all data by full-matrix least squares with SHELXL.<sup>11</sup> All non-hydrogen atoms were refined anisotropically. Hydrogen atoms were included in the model at geometrically calculated positions and refined using a riding model. The isotropic displacement parameters of all hydrogen atoms were fixed to 1.2 times the U value of the atoms to which they are linked (1.5 times for methyl groups). One ether molecule is disordered over three positions. Their site occupancies were fixed near the values of 0.33, with one carbon shared between two models (site occupancy 0.66). O1A and C1B occupy the same space and were constrained to have the same X, Y, Z and thermal parameters. One Fe coordinated ether is disordered over two positions. Due to the proximity of these atoms, rigid bond restraints and thermal parameter constraints were used. All disordered C-C and C-O bond distances that are chemically similar were restrained to have similar distances. CCDC number 2118694 contains the supplementary crystallographic data for **5-Et<sub>2</sub>O**.

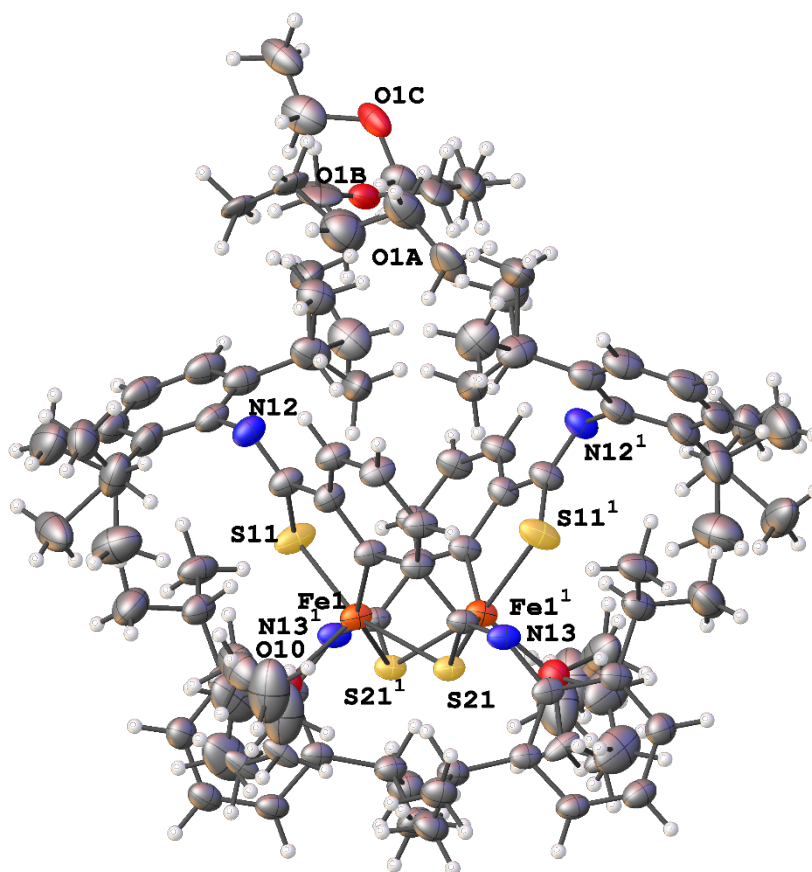

**Figure S70.** A partial numbering scheme of **5-Et<sub>2</sub>O** with 50% thermal ellipsoid probability levels. The hydrogen atoms are omitted for clarity. Atoms with superscript 1 are generated by the symmetry operator  $(1 - x, y, \frac{3}{2} - z)$ .

**Table S4.** Crystal data and structure refinement for **5-Et<sub>2</sub>O**.

|                                   |                                                                                                  |                 |
|-----------------------------------|--------------------------------------------------------------------------------------------------|-----------------|
| Identification code               | 007c-19024                                                                                       |                 |
| CCDC code                         | 2118694                                                                                          |                 |
| Empirical formula                 | C <sub>80.01</sub> H <sub>114</sub> Fe <sub>2</sub> N <sub>4</sub> O <sub>4</sub> S <sub>4</sub> |                 |
| Formula weight                    | 1435.78                                                                                          |                 |
| Temperature                       | 93(2) K                                                                                          |                 |
| Wavelength                        | 0.71073 Å                                                                                        |                 |
| Crystal system                    | Monoclinic                                                                                       |                 |
| Space group                       | C2/c                                                                                             |                 |
| Unit cell dimensions              | a = 18.2490(19) Å                                                                                | α = 90°.        |
|                                   | b = 19.853(2) Å                                                                                  | β = 95.556(7)°. |
|                                   | c = 23.4606(17) Å                                                                                | γ = 90°.        |
| Volume                            | 8459.7(14) Å <sup>3</sup>                                                                        |                 |
| Z                                 | 4                                                                                                |                 |
| Density (calculated)              | 1.127 g/cm <sup>3</sup>                                                                          |                 |
| Absorption coefficient            | 0.487 mm <sup>-1</sup>                                                                           |                 |
| F(000)                            | 3080                                                                                             |                 |
| Crystal size                      | 0.200 x 0.200 x 0.150 mm <sup>3</sup>                                                            |                 |
| Crystal color and habit           | Red Block                                                                                        |                 |
| Diffractometer                    | Dectris Pilatus 3R                                                                               |                 |
| Theta range for data collection   | 2.931 to 27.482°.                                                                                |                 |
| Index ranges                      | -17 ≤ h ≤ 23, -25 ≤ k ≤ 22, -30 ≤ l ≤ 26                                                         |                 |
| Reflections collected             | 47976                                                                                            |                 |
| Independent reflections           | 9701 [R(int) = 0.0555]                                                                           |                 |
| Observed reflections (I > 2σ(I))  | 6818                                                                                             |                 |
| Completeness to theta = 25.242°   | 99.8 %                                                                                           |                 |
| Absorption correction             | Semi-empirical from equivalents                                                                  |                 |
| Max. and min. transmission        | 1.00000 and 0.54478                                                                              |                 |
| Solution method                   | SHELXT-2014/5 (Sheldrick, 2014)                                                                  |                 |
| Refinement method                 | SHELXL-2014/7 (Sheldrick, 2014)                                                                  |                 |
| Data / restraints / parameters    | 9701 / 72 / 556                                                                                  |                 |
| Goodness-of-fit on F <sup>2</sup> | 1.051                                                                                            |                 |
| Final R indices [I > 2σ(I)]       | R1 = 0.0717, wR2 = 0.1917                                                                        |                 |
| R indices (all data)              | R1 = 0.1082, wR2 = 0.2353                                                                        |                 |
| Largest diff. peak and hole       | 1.641 and -0.692 e.Å <sup>-3</sup>                                                               |                 |

**K<sub>4</sub>[LFe<sup>II</sup>]<sub>4</sub>(Et<sub>2</sub>O)<sub>2</sub> (6)**

Low-temperature diffraction data ( $\omega$ -scans) were collected on a Rigaku MicroMax-007HF diffractometer coupled to a Saturn994+ CCD detector with Cu K $\alpha$  ( $\lambda = 1.54178$  Å). The diffraction images were processed and scaled using Rigaku Oxford Diffraction software (CrysAlisPro; Rigaku OD: The Woodlands, TX, 2015). The structure was solved with SHELXT and was refined against  $F^2$  on all data by full-matrix least squares with SHELXL.<sup>11</sup> All non-hydrogen atoms were refined anisotropically. Hydrogen atoms were included in the model at geometrically calculated positions and refined using a riding model. The isotropic displacement parameters of all hydrogen atoms were fixed to 1.2 times the U value of the atoms to which they are linked (1.5 times for methyl groups). The thermal parameters were restrained with a global application of similarity and rigid bond restraints. The diffraction data was not ideal. The program SQUEEZE (see A.L. Spek, J. Appl. Cryst. 2015, C71, 9-18) was used to compensate for the contribution of disordered solvents contained in voids within the crystal lattice from the diffraction intensities. This procedure was applied to the data file and the submitted model is based on the solvent removed data. Based on the total electron density found in the voids (5094 e/Å<sup>3</sup>), it is likely that ~120 ether molecules are present in the unit cell. See "\_platon\_squeeze\_details" in this .cif for more information. CCDC number 2120364 contains the supplementary crystallographic data for **6**.

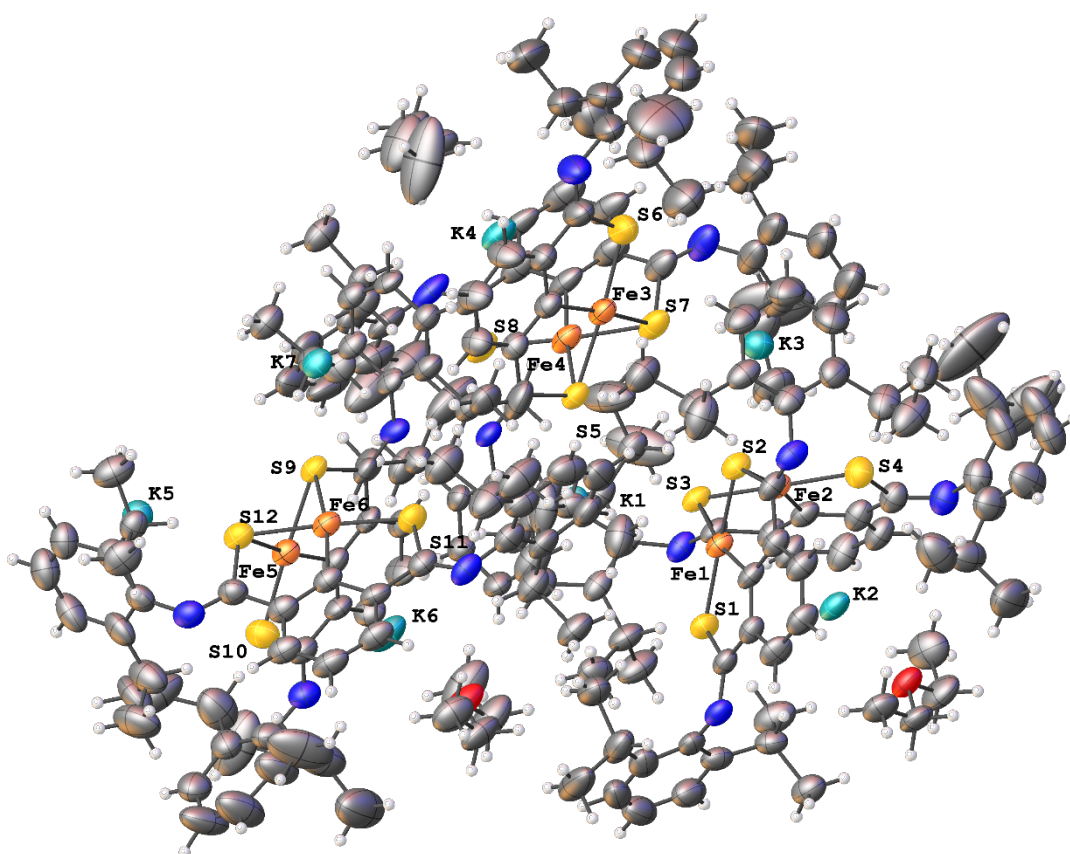

**Figure S71.** A partial numbering scheme of **6** with 50% thermal ellipsoid probability levels. The hydrogen atoms are omitted for clarity.

**Table S5.** Crystal data and structure refinement for **6**.

|                                   |                                                                                                               |                       |
|-----------------------------------|---------------------------------------------------------------------------------------------------------------|-----------------------|
| Identification code               | 007b-21015                                                                                                    |                       |
| CCDC code                         | 2120364                                                                                                       |                       |
| Empirical formula                 | C <sub>136</sub> H <sub>168</sub> Fe <sub>4</sub> K <sub>4</sub> N <sub>8</sub> O <sub>2</sub> S <sub>8</sub> |                       |
| Formula weight                    | 2583.05                                                                                                       |                       |
| Temperature                       | 93(2) K                                                                                                       |                       |
| Wavelength                        | 1.54184 Å                                                                                                     |                       |
| Crystal system                    | Orthorhombic                                                                                                  |                       |
| Space group                       | Pbcn                                                                                                          |                       |
| Unit cell dimensions              | a = 26.7161(4) Å                                                                                              | $\alpha = 90^\circ$ . |
|                                   | b = 38.8484(10) Å                                                                                             | $\beta = 90^\circ$ .  |
|                                   | c = 51.7223(8) Å                                                                                              | $\gamma = 90^\circ$ . |
| Volume                            | 53681.4(18) Å <sup>3</sup>                                                                                    |                       |
| Z                                 | 12                                                                                                            |                       |
| Density (calculated)              | 0.959 g/cm <sup>3</sup>                                                                                       |                       |
| Absorption coefficient            | 4.553 mm <sup>-1</sup>                                                                                        |                       |
| F(000)                            | 16368                                                                                                         |                       |
| Crystal size                      | 0.200 x 0.080 x 0.020 mm <sup>3</sup>                                                                         |                       |
| Crystal color and habit           | Red Block                                                                                                     |                       |
| Diffractometer                    | Rigaku Saturn 944+ CCD                                                                                        |                       |
| Theta range for data collection   | 1.708 to 66.601°.                                                                                             |                       |
| Index ranges                      | -31 ≤ h ≤ 31, -46 ≤ k ≤ 46, -61 ≤ l ≤ 61                                                                      |                       |
| Reflections collected             | 1818611                                                                                                       |                       |
| Independent reflections           | 47420 [R(int) = 0.4371]                                                                                       |                       |
| Observed reflections (I > 2σ(I))  | 23538                                                                                                         |                       |
| Completeness to theta = 66.601°   | 100.0 %                                                                                                       |                       |
| Absorption correction             | Semi-empirical from equivalents                                                                               |                       |
| Max. and min. transmission        | 1.00000 and 0.37500                                                                                           |                       |
| Solution method                   | SHELXT-2014/5 (Sheldrick, 2014)                                                                               |                       |
| Refinement method                 | SHELXL-2014/7 (Sheldrick, 2014)                                                                               |                       |
| Data / restraints / parameters    | 47420 / 2255 / 2189                                                                                           |                       |
| Goodness-of-fit on F <sup>2</sup> | 1.020                                                                                                         |                       |
| Final R indices [I > 2σ(I)]       | R1 = 0.1273, wR2 = 0.3251                                                                                     |                       |
| R indices (all data)              | R1 = 0.2110, wR2 = 0.3833                                                                                     |                       |
| Largest diff. peak and hole       | 1.000 and -0.490 e.Å <sup>-3</sup>                                                                            |                       |

**K(18-crown-6)[LFe<sup>III</sup>(SAr)(THF)] (7-crown)**

Low-temperature diffraction data ( $\omega$ -scans) were collected on a Rigaku MicroMax-007HF diffractometer coupled to a Saturn994+ CCD detector with Cu K $\alpha$  ( $\lambda = 1.54178$  Å) for the structure of 007a-19041. The diffraction images were processed and scaled using Rigaku Oxford Diffraction software (CrysAlisPro; Rigaku OD: The Woodlands, TX, 2015). The structure was solved with SHELXT and was refined against  $F^2$  on all data by full-matrix least squares with SHELXL.<sup>11</sup> All non-hydrogen atoms were refined anisotropically. Hydrogen atoms were included in the model at geometrically calculated positions and refined using a riding model. The isotropic displacement parameters of all hydrogen atoms were fixed to 1.2 times the U value of the atoms to which they are linked (1.5 times for methyl groups). CCDC number 2118697 contains the supplementary crystallographic data for **7-crown**.

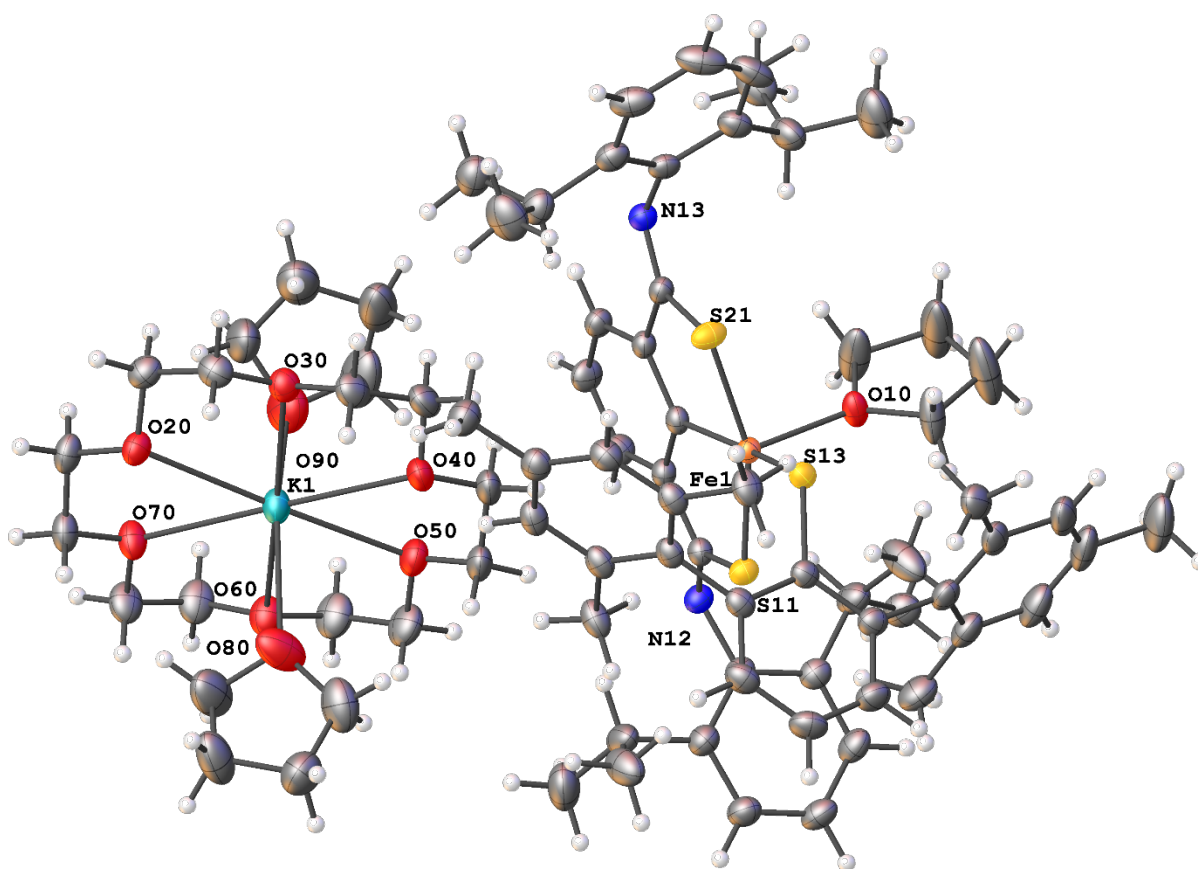

**Figure S72.** A partial numbering scheme of **7-crown** with 50% thermal ellipsoid probability levels. The hydrogen atoms are shown as circles for clarity.



**Table S6.** Crystal data and structure refinement for **7-crown**.

|                                   |                                                                                    |                   |
|-----------------------------------|------------------------------------------------------------------------------------|-------------------|
| Identification code               | 007a-19041                                                                         |                   |
| CCDC code                         | 2118697                                                                            |                   |
| Empirical formula                 | C <sub>80</sub> H <sub>110</sub> Fe K N <sub>2</sub> O <sub>9</sub> S <sub>3</sub> |                   |
| Formula weight                    | 1434.82                                                                            |                   |
| Temperature                       | 93(2) K                                                                            |                   |
| Wavelength                        | 1.54184 Å                                                                          |                   |
| Crystal system                    | Monoclinic                                                                         |                   |
| Space group                       | P2 <sub>1</sub> /c                                                                 |                   |
| Unit cell dimensions              | a = 14.6615(2) Å                                                                   | α = 90°.          |
|                                   | b = 17.3994(2) Å                                                                   | β = 92.7400(10)°. |
|                                   | c = 30.6230(4) Å                                                                   | γ = 90°.          |
| Volume                            | 7803.04(17) Å <sup>3</sup>                                                         |                   |
| Z                                 | 4                                                                                  |                   |
| Density (calculated)              | 1.221 g/cm <sup>3</sup>                                                            |                   |
| Absorption coefficient            | 3.212 mm <sup>-1</sup>                                                             |                   |
| F(000)                            | 3076                                                                               |                   |
| Crystal size                      | 0.200 x 0.200 x 0.010 mm <sup>3</sup>                                              |                   |
| Crystal color and habit           | Red Plate                                                                          |                   |
| Diffractionmeter                  | Rigaku Saturn 944+ CCD                                                             |                   |
| Theta range for data collection   | 2.889 to 66.823°.                                                                  |                   |
| Index ranges                      | -17 ≤ h ≤ 17, -20 ≤ k ≤ 20, -36 ≤ l ≤ 36                                           |                   |
| Reflections collected             | 286932                                                                             |                   |
| Independent reflections           | 13826 [R(int) = 0.0526]                                                            |                   |
| Observed reflections (I > 2σ(I))  | 13012                                                                              |                   |
| Completeness to theta = 66.823°   | 99.8 %                                                                             |                   |
| Absorption correction             | Semi-empirical from equivalents                                                    |                   |
| Max. and min. transmission        | 1.00000 and 0.62838                                                                |                   |
| Solution method                   | SHELXT-2014/5 (Sheldrick, 2014)                                                    |                   |
| Refinement method                 | SHELXL-2014/7 (Sheldrick, 2014)                                                    |                   |
| Data / restraints / parameters    | 13826 / 0 / 879                                                                    |                   |
| Goodness-of-fit on F <sup>2</sup> | 1.015                                                                              |                   |
| Final R indices [I > 2σ(I)]       | R1 = 0.0369, wR2 = 0.0967                                                          |                   |
| R indices (all data)              | R1 = 0.0391, wR2 = 0.0985                                                          |                   |
| Extinction coefficient            | n/a                                                                                |                   |
| Largest diff. peak and hole       | 0.768 and -0.442 e.Å <sup>-3</sup>                                                 |                   |

**K(18-crown-6)[LFe<sup>III</sup>(SAr)] (8-crown)**

Low-temperature diffraction data ( $\omega$ -scans) were collected on a Rigaku MicroMax-007HF diffractometer coupled to a Dectris Pilatus3R detector with Mo K $\alpha$  ( $\lambda = 0.71073$  Å) for the structure of 007c-19044. The diffraction images were processed and scaled using Rigaku Oxford Diffraction software (CrysAlisPro; Rigaku OD: The Woodlands, TX, 2015). The structure was solved with SHELXT and was refined against  $F^2$  on all data by full-matrix least squares with SHELXL.<sup>11</sup> All non-hydrogen atoms were refined anisotropically. Hydrogen atoms were included in the model at geometrically calculated positions and refined using a riding model. The isotropic displacement parameters of all hydrogen atoms were fixed to 1.2 times the U value of the atoms to which they are linked (1.5 times for methyl groups). One toluene is disordered across the crystallographic inversion center. The methyl was fixed at half occupancy. The hydrogen atoms were generated and constrained in geometrically expected positions. No additional restraints or constraints were needed. CCDC number 2118696 contains the supplementary crystallographic data for **8-crown**.

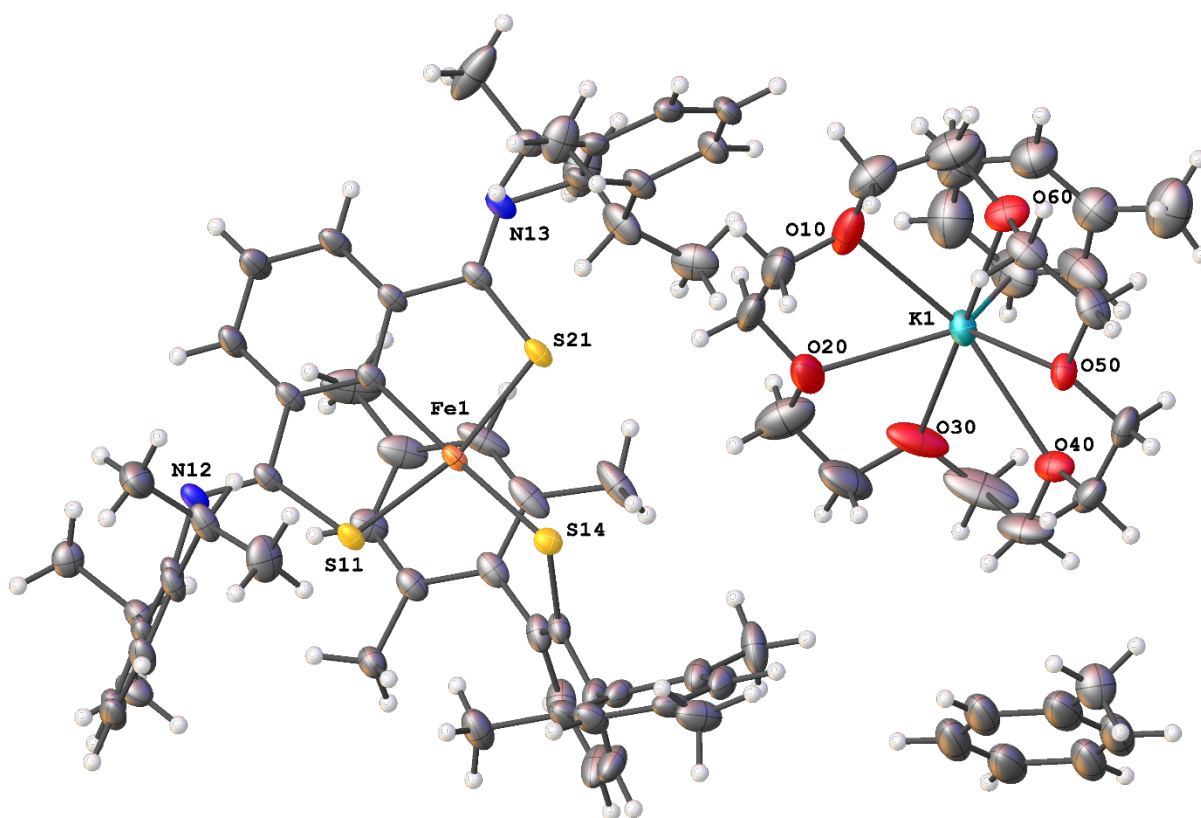

**Figure S73.** A partial numbering scheme of **8-crown** with 50% thermal ellipsoid probability levels. The hydrogen atoms are shown as circles for clarity.

**Table S7.** Crystal data and structure refinement for **8-crown**.

|                                   |                                          |                              |
|-----------------------------------|------------------------------------------|------------------------------|
| Identification code               | 007c-19044                               |                              |
| CCDC code                         | 2118696                                  |                              |
| Empirical formula                 | C78.50 H98 Fe K N2 O6 S3                 |                              |
| Formula weight                    | 1356.71                                  |                              |
| Temperature                       | 93(2) K                                  |                              |
| Wavelength                        | 0.71073 Å                                |                              |
| Crystal system                    | Triclinic                                |                              |
| Space group                       | P-1                                      |                              |
| Unit cell dimensions              | a = 15.5618(6) Å                         | $\alpha = 73.279(4)^\circ$ . |
|                                   | b = 16.0210(7) Å                         | $\beta = 70.720(4)^\circ$ .  |
|                                   | c = 16.5200(7) Å                         | $\gamma = 78.134(3)^\circ$ . |
| Volume                            | 3695.3(3) Å <sup>3</sup>                 |                              |
| Z                                 | 2                                        |                              |
| Density (calculated)              | 1.219 g/cm <sup>3</sup>                  |                              |
| Absorption coefficient            | 0.397 mm <sup>-1</sup>                   |                              |
| F(000)                            | 1448                                     |                              |
| Crystal size                      | 0.200 x 0.200 x 0.050 mm <sup>3</sup>    |                              |
| Crystal color and habit           | Red Plate                                |                              |
| Diffractometer                    | Dectris Pilatus 3R                       |                              |
| Theta range for data collection   | 2.947 to 27.793°.                        |                              |
| Index ranges                      | -20 ≤ h ≤ 20, -20 ≤ k ≤ 20, -21 ≤ l ≤ 20 |                              |
| Reflections collected             | 65241                                    |                              |
| Independent reflections           | 16967 [R(int) = 0.0922]                  |                              |
| Observed reflections (I > 2σ(I))  | 13858                                    |                              |
| Completeness to theta = 25.242°   | 99.7 %                                   |                              |
| Absorption correction             | Semi-empirical from equivalents          |                              |
| Max. and min. transmission        | 1.00000 and 0.79955                      |                              |
| Solution method                   | SHELXT-2014/5 (Sheldrick, 2014)          |                              |
| Refinement method                 | SHELXL-2014/7 (Sheldrick, 2014)          |                              |
| Data / restraints / parameters    | 16967 / 0 / 845                          |                              |
| Goodness-of-fit on F <sup>2</sup> | 1.077                                    |                              |
| Final R indices [I > 2σ(I)]       | R1 = 0.0755, wR2 = 0.2068                |                              |
| R indices (all data)              | R1 = 0.0881, wR2 = 0.2190                |                              |
| Largest diff. peak and hole       | 1.996 and -1.090 e.Å <sup>-3</sup>       |                              |

### **K[ $\text{LFe}^{\text{III}}(\text{N}(\text{TMS})_2)$ ] **(9)****

Low-temperature diffraction data ( $\omega$ -scans) were collected on a Rigaku MicroMax-007HF diffractometer coupled to a Saturn994+ CCD detector with Cu K $\alpha$  ( $\lambda = 1.54178 \text{ \AA}$ ) for the structure of 007b-16092. The diffraction images were processed and scaled using Rigaku Oxford Diffraction software (CrysAlisPro; Rigaku OD: The Woodlands, TX, 2015). The structure was solved with SHELXT and was refined against  $F^2$  on all data by full-matrix least squares with SHELXL.<sup>11</sup> All non-hydrogen atoms were refined anisotropically. Hydrogen atoms were included in the model at geometrically calculated positions and refined using a riding model. The isotropic displacement parameters of all hydrogen atoms were fixed to 1.2 times the U value of the atoms to which they are linked (1.5 times for methyl groups). The program SQUEEZE was used to compensate for the contribution of disordered solvents contained in voids within the crystal lattice from the diffraction intensities. This procedure was applied to the data file and the submitted model is based on the solvent removed data. Based on the total electron density found in the voids ( $247 \text{ e/\AA}^3$ ), it is likely that  $\sim 8$  pentane molecules are present in the unit cell. CCDC number 2118698 contains the supplementary crystallographic data for **9**.

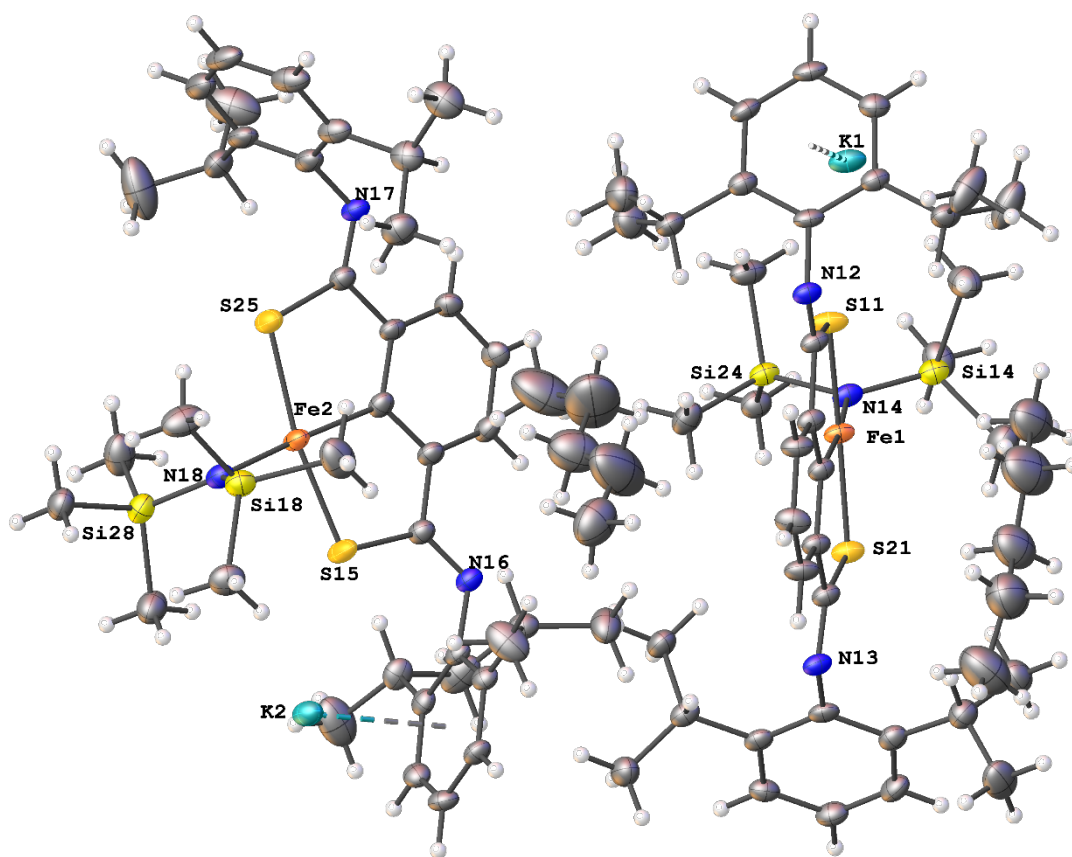

**Figure S74.** A partial numbering scheme of **9** with 50% thermal ellipsoid probability levels. The hydrogen atoms are omitted for clarity.

**Table S8.** Crystal data and structure refinement for **9**.

|                                   |                                                                                    |                  |
|-----------------------------------|------------------------------------------------------------------------------------|------------------|
| Identification code               | 007b-19062                                                                         |                  |
| CCDC code                         | 2118698                                                                            |                  |
| Empirical formula                 | C <sub>43</sub> H <sub>67</sub> Fe K N <sub>3</sub> S <sub>2</sub> Si <sub>2</sub> |                  |
| Formula weight                    | 841.24                                                                             |                  |
| Temperature                       | 93(2) K                                                                            |                  |
| Wavelength                        | 1.54184 Å                                                                          |                  |
| Crystal system                    | Monoclinic                                                                         |                  |
| Space group                       | P2 <sub>1</sub> /n                                                                 |                  |
| Unit cell dimensions              | a = 13.3160(3) Å                                                                   | α = 90°.         |
|                                   | b = 38.4243(8) Å                                                                   | β = 102.431(2)°. |
|                                   | c = 20.3073(4) Å                                                                   | γ = 90°.         |
| Volume                            | 10146.8(4) Å <sup>3</sup>                                                          |                  |
| Z                                 | 8                                                                                  |                  |
| Density (calculated)              | 1.101 g/cm <sup>3</sup>                                                            |                  |
| Absorption coefficient            | 4.550 mm <sup>-1</sup>                                                             |                  |
| F(000)                            | 3608                                                                               |                  |
| Crystal size                      | 0.300 x 0.020 x 0.020 mm <sup>3</sup>                                              |                  |
| Crystal color and habit           | Red Needle                                                                         |                  |
| Diffractometer                    | Rigaku Saturn 944+ CCD                                                             |                  |
| Theta range for data collection   | 2.507 to 66.600°.                                                                  |                  |
| Index ranges                      | -15 ≤ h ≤ 15, -45 ≤ k ≤ 45, -24 ≤ l ≤ 24                                           |                  |
| Reflections collected             | 246866                                                                             |                  |
| Independent reflections           | 17871 [R(int) = 0.1152]                                                            |                  |
| Observed reflections (I > 2σ(I))  | 13667                                                                              |                  |
| Completeness to theta = 66.600°   | 99.7 %                                                                             |                  |
| Absorption correction             | Semi-empirical from equivalents                                                    |                  |
| Max. and min. transmission        | 1.00000 and 0.58051                                                                |                  |
| Solution method                   | SHELXT-2014/5 (Sheldrick, 2014)                                                    |                  |
| Refinement method                 | SHELXL-2014/7 (Sheldrick, 2014)                                                    |                  |
| Data / restraints / parameters    | 17871 / 0 / 969                                                                    |                  |
| Goodness-of-fit on F <sup>2</sup> | 1.013                                                                              |                  |
| Final R indices [I > 2σ(I)]       | R1 = 0.0531, wR2 = 0.1202                                                          |                  |
| R indices (all data)              | R1 = 0.0755, wR2 = 0.1310                                                          |                  |
| Largest diff. peak and hole       | 0.735 and -0.417 e.Å <sup>-3</sup>                                                 |                  |

**K(18-crown-6)[LFe<sup>III</sup>(N(TMS)<sub>2</sub>)<sub>2</sub>] (9-crown)**

Low-temperature diffraction data ( $\omega$ -scans) were collected on a Rigaku MicroMax-007HF diffractometer coupled to a Saturn994+ CCD detector with Cu K $\alpha$  ( $\lambda = 1.54178$  Å) for the structure of 007a-19014. The diffraction images were processed and scaled using Rigaku Oxford Diffraction software (CrysAlisPro; Rigaku OD: The Woodlands, TX, 2015). The structure was solved with SHELXT and was refined against  $F^2$  on all data by full-matrix least squares with SHELXL.<sup>11</sup> All non-hydrogen atoms were refined anisotropically. Hydrogen atoms were included in the model at geometrically calculated positions and refined using a riding model. The isotropic displacement parameters of all hydrogen atoms were fixed to 1.2 times the U value of the atoms to which they are linked (1.5 times for methyl groups). One THF coordinated to potassium was modeled as disordered. Chemically similar 1,2 and 1,3 distances of the disordered model were restrained to be similar. The site occupancies were freely refined to converged values near 0.65/0.35. The program SQUEEZE was used to compensate for the contribution of disordered solvents contained in voids within the crystal lattice from the diffraction intensities. This procedure was applied to the data file and the submitted model is based on the solvent removed data. Based on the total electron density found in the voids (138 e/Å<sup>3</sup>), it is likely that ~3 THF molecules are present in the unit cell. See "\_platon\_squeeze\_details" in this .cif for more information. CCDC number 2118699 contains the supplementary crystallographic data for **9-crown**.

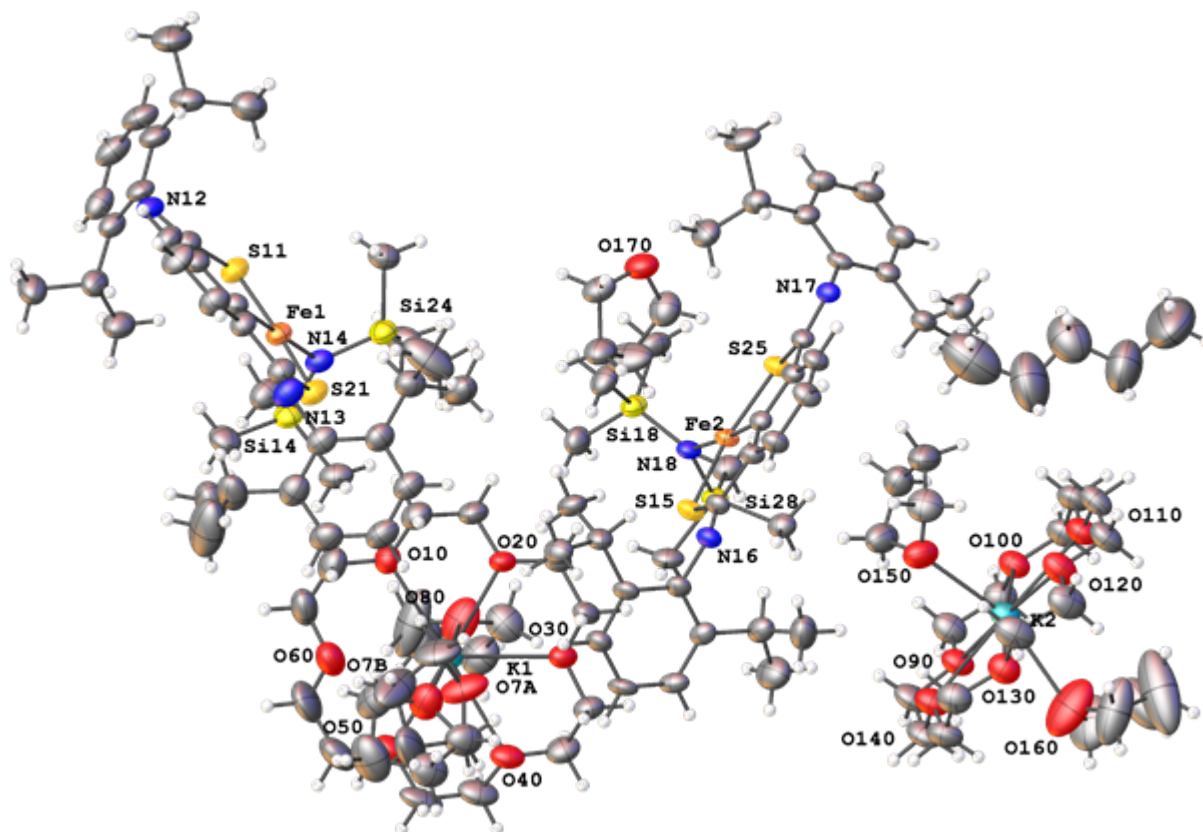

**Figure S75.** A partial numbering scheme of **9-crown** with 50% thermal ellipsoid probability levels. The hydrogen atoms are shown as circles for clarity.

**Table S9.** Crystal data and structure refinement for **9-crown**.

|                                   |                                                                                                          |                 |
|-----------------------------------|----------------------------------------------------------------------------------------------------------|-----------------|
| Identification code               | 007a-19014                                                                                               |                 |
| CCDC code                         | 2118699                                                                                                  |                 |
| Empirical formula                 | C <sub>62.50</sub> H <sub>105</sub> Fe K N <sub>3</sub> O <sub>8.50</sub> S <sub>2</sub> Si <sub>2</sub> |                 |
| Formula weight                    | 1249.74                                                                                                  |                 |
| Temperature                       | 93(2) K                                                                                                  |                 |
| Wavelength                        | 1.54184 Å                                                                                                |                 |
| Crystal system                    | Monoclinic                                                                                               |                 |
| Space group                       | P2 <sub>1</sub> /n                                                                                       |                 |
| Unit cell dimensions              | a = 22.5668(6) Å                                                                                         | α = 90°.        |
|                                   | b = 13.6389(2) Å                                                                                         | β = 89.938(2)°. |
|                                   | c = 47.2831(13) Å                                                                                        | γ = 90°.        |
| Volume                            | 14553.1(6) Å <sup>3</sup>                                                                                |                 |
| Z                                 | 8                                                                                                        |                 |
| Density (calculated)              | 1.141 g/cm <sup>3</sup>                                                                                  |                 |
| Absorption coefficient            | 3.412 mm <sup>-1</sup>                                                                                   |                 |
| F(000)                            | 5392                                                                                                     |                 |
| Crystal size                      | 0.200 x 0.080 x 0.020 mm <sup>3</sup>                                                                    |                 |
| Crystal color and habit           | Red Plate                                                                                                |                 |
| Diffractometer                    | Rigaku Saturn 944+ CCD                                                                                   |                 |
| Theta range for data collection   | 1.869 to 66.600°.                                                                                        |                 |
| Index ranges                      | -26 ≤ h ≤ 26, -16 ≤ k ≤ 16, -54 ≤ l ≤ 55                                                                 |                 |
| Reflections collected             | 512934                                                                                                   |                 |
| Independent reflections           | 25521 [R(int) = 0.1838]                                                                                  |                 |
| Observed reflections (I > 2σ(I))  | 20203                                                                                                    |                 |
| Completeness to theta = 66.600°   | 99.2 %                                                                                                   |                 |
| Absorption correction             | Semi-empirical from equivalents                                                                          |                 |
| Max. and min. transmission        | 1.00000 and 0.34851                                                                                      |                 |
| Solution method                   | SHELXT-2014/5 (Sheldrick, 2014)                                                                          |                 |
| Refinement method                 | SHELXL-2014/7 (Sheldrick, 2014)                                                                          |                 |
| Data / restraints / parameters    | 25521 / 22 / 1508                                                                                        |                 |
| Goodness-of-fit on F <sup>2</sup> | 1.134                                                                                                    |                 |
| Final R indices [I > 2σ(I)]       | R1 = 0.0935, wR2 = 0.1944                                                                                |                 |
| R indices (all data)              | R1 = 0.1117, wR2 = 0.2023                                                                                |                 |
| Largest diff. peak and hole       | 1.063 and -0.524 e.Å <sup>-3</sup>                                                                       |                 |

**[LFe<sup>III</sup>(NH<sub>3</sub>)(THF)] (10)**

Low-temperature diffraction data ( $\omega$ -scans) were collected on a Rigaku MicroMax-007HF diffractometer coupled to a Dectris Pilatus3R detector with Mo K $\alpha$  ( $\lambda$  = 0.71073 Å) for the structure of 007c-20076. The diffraction images were processed and scaled using Rigaku Oxford Diffraction software (CrysAlisPro; Rigaku OD: The Woodlands, TX, 2015). The structure was solved with SHELXT and was refined against  $F^2$  on all data by full-matrix least squares with SHELXL.<sup>11</sup> This data was refined as a 2-component inversion twin. The fractional volume contribution of the minor twin component was freely refined to a converged value of 0.087(13). All non-hydrogen atoms were refined anisotropically. Hydrogen atoms were included in the model at geometrically calculated positions and refined using a riding model. The isotropic displacement parameters of all hydrogen atoms were fixed to 1.2 times the U value of the atoms to which they are linked (1.5 times for methyl groups). The only exceptions are the protons in NH<sub>3</sub>. Those sites were found in the difference map and freely refined. All N-H distances were restrained to be similar. One isopropyl group is disordered over two positions. The site occupancies were freely refined to converged values of 0.70/0.30. Due to the small amount of electron density, the thermal parameters at the minor site were constrained to be the same as those of the chemically identical major site. A similar approach was used in the disordered ether. All chemically equivalent C-C and C-O distances were restrained to be similar. The program SQUEEZE (see A.L.Spek, J. Appl. Cryst. 2015, C71, 9-18) was used to compensate for the contribution of disordered solvents contained in voids within the crystal lattice from the diffraction intensities. This procedure was applied to the data file and the submitted model is based on the solvent removed data. Based on the total electron density found in the voids (167 e/Å<sup>3</sup>) it is likely that ~4 ether, ~4 THF, or some combination of these two solvent molecules are present in the unit cell. CCDC number 2118700 contains the supplementary crystallographic data for **10**.

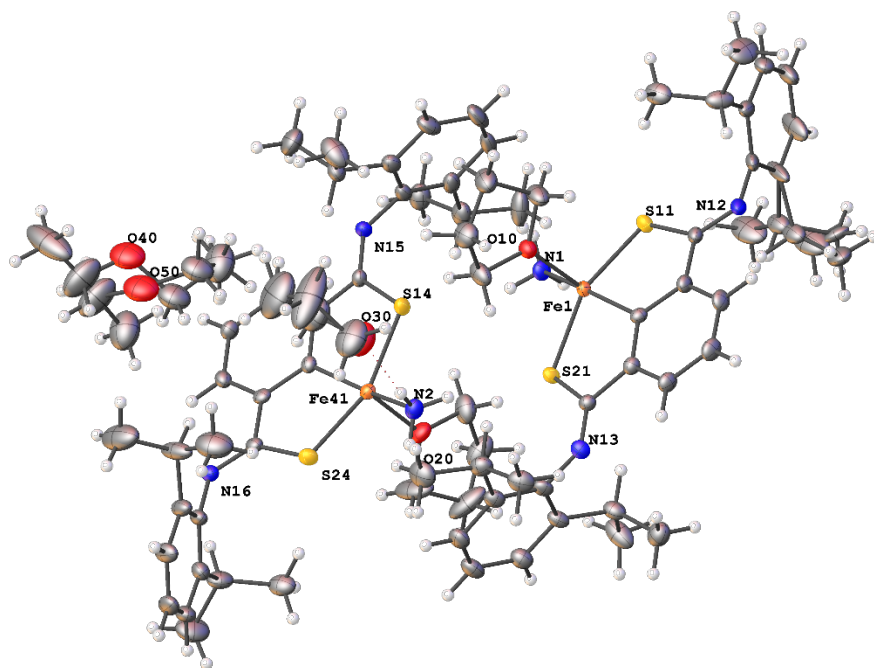

**Figure S76.** A partial numbering scheme of **10** with 50% thermal ellipsoid probability levels. The hydrogen atoms are shown as circles for clarity.



**Table S10.** Crystal data and structure refinement for **10**.

|                                   |                                                                                 |                  |
|-----------------------------------|---------------------------------------------------------------------------------|------------------|
| Identification code               | 007c-20076                                                                      |                  |
| CCDC code                         | 2118700                                                                         |                  |
| Empirical formula                 | C <sub>40</sub> H <sub>57</sub> Fe N <sub>3</sub> O <sub>2</sub> S <sub>2</sub> |                  |
| Formula weight                    | 731.85                                                                          |                  |
| Temperature                       | 93(2) K                                                                         |                  |
| Wavelength                        | 0.71073 Å                                                                       |                  |
| Crystal system                    | Monoclinic                                                                      |                  |
| Space group                       | P2 <sub>1</sub>                                                                 |                  |
| Unit cell dimensions              | a = 17.0373(4) Å                                                                | α = 90°.         |
|                                   | b = 15.3942(3) Å                                                                | β = 105.434(2)°. |
|                                   | c = 17.3731(4) Å                                                                | γ = 90°.         |
| Volume                            | 4392.22(17) Å <sup>3</sup>                                                      |                  |
| Z                                 | 4                                                                               |                  |
| Density (calculated)              | 1.107 g/cm <sup>3</sup>                                                         |                  |
| Absorption coefficient            | 0.471 mm <sup>-1</sup>                                                          |                  |
| F(000)                            | 1568                                                                            |                  |
| Crystal size                      | 0.200 x 0.120 x 0.090 mm <sup>3</sup>                                           |                  |
| Crystal color and habit           | Orange Block                                                                    |                  |
| Diffractometer                    | Dectris Pilatus 3R                                                              |                  |
| Theta range for data collection   | 2.757 to 27.483°.                                                               |                  |
| Index ranges                      | -21 ≤ h ≤ 22, -19 ≤ k ≤ 19, -22 ≤ l ≤ 22                                        |                  |
| Reflections collected             | 88042                                                                           |                  |
| Independent reflections           | 20102 [R(int) = 0.0315]                                                         |                  |
| Observed reflections (I > 2σ(I))  | 18478                                                                           |                  |
| Completeness to theta = 25.242°   | 99.8 %                                                                          |                  |
| Absorption correction             | Semi-empirical from equivalents                                                 |                  |
| Max. and min. transmission        | 1.00000 and 0.58906                                                             |                  |
| Solution method                   | SHELXT-2014/5 (Sheldrick, 2014)                                                 |                  |
| Refinement method                 | SHELXL-2014/7 (Sheldrick, 2014)                                                 |                  |
| Data / restraints / parameters    | 20102 / 36 / 933                                                                |                  |
| Goodness-of-fit on F <sup>2</sup> | 1.018                                                                           |                  |
| Final R indices [I > 2σ(I)]       | R1 = 0.0371, wR2 = 0.0971                                                       |                  |
| R indices (all data)              | R1 = 0.0420, wR2 = 0.1001                                                       |                  |
| Absolute structure parameter      | 0.087(13)                                                                       |                  |
| Extinction coefficient            | n/a                                                                             |                  |
| Largest diff. peak and hole       | 0.687 and -0.506 e.Å <sup>-3</sup>                                              |                  |

## Additional Experiments

To clarify whether the coordinated THF in **10** can be removed, crystals of **10** were crushed, washed with pentane, and dried under vacuum for several hours. A Mössbauer spectrum of the resulting material was identical to the crystalline material, providing evidence against a change in the iron coordination number. There were no free THF signals in the  $C_6D_6$ -solvated  $^1H$  NMR spectrum of the material before it was subjected to several hours under vacuum. Furthermore, the crystals for X-ray diffraction (which demonstrated iron-coordinated THF) were obtained by pumping down the crude reaction mixture and re-dissolving the solids in neat  $Et_2O$ , from which the crystals were grown. All of these indicators are inconsistent with the ability to remove coordinated THF from **10** by simple trituration or vacuum as can be done for **8**.

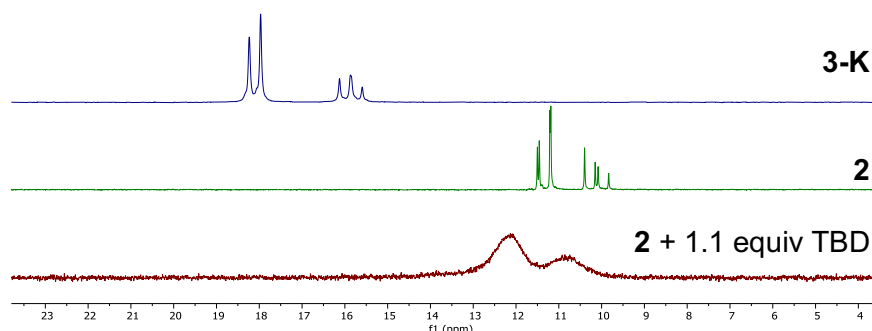

**Figure S77.**  $^{31}P\{^1H\}$  NMR spectra comparison between **3-K**, **2**, and the equilibrium experiment of **2** in the presence of 1.1 equiv triazabicyclodecene (TBD) in THF. We assumed that the chemical shifts from the  $^{31}P$  NMR spectrum of **3-K** represent the shifts of fully deprotonated **2**. Equilibrium concentrations were determined from the initial concentrations of TBD and **2** and the chemical shifts of the coalesced peaks upon equilibration. Values used to calculate  $K_{eq}$ :  $[2] = 22.0$  mM,  $[TBD] = 24.4$  mM,  $[2^-] = 6.5$  mM,  $[HTBD^+] = 7.2$  mM. Allowing an error of  $\pm 1$  ppm in the chemical shift results in a  $pK_a$  difference of  $\pm 0.9$ , which we rounded to  $\pm 1$ .

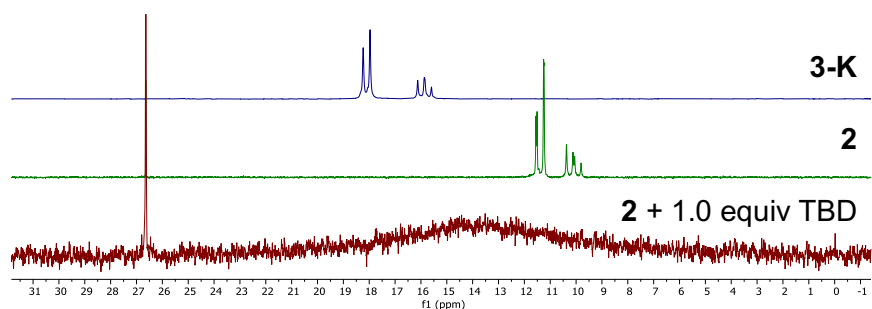

**Figure S78.**  $^{31}P\{^1H\}$  NMR spectra comparison between **3-K**, **2**, and the equilibrium experiment of **2** in the presence of 1.0 equiv triazabicyclodecene (TBD) in a 0.3 M solution of  $[NBu_4][PF_6]$  in THF. The signal at  $\sim 27$  ppm is from a capillary standard of  $Me_3P=S$ . We assumed that the chemical shifts from the  $^{31}P$  NMR spectrum of **3-K** represent the shifts of fully deprotonated **2**. Equilibrium concentrations were determined from the initial concentrations of TBD and **2** and the chemical shift of the coalesced peak upon equilibration. Values used to calculate  $K_{eq}$ :  $[2] = 17.7$  mM,  $[TBD] = 17.4$  mM,  $[2^-] = 14.3$  mM,  $[HTBD^+] = 14.2$  mM. Allowing an error of  $\pm 1$  ppm in the chemical shift results in a  $pK_a$  difference of  $\pm 0.6$ , which we rounded to  $\pm 1$ .

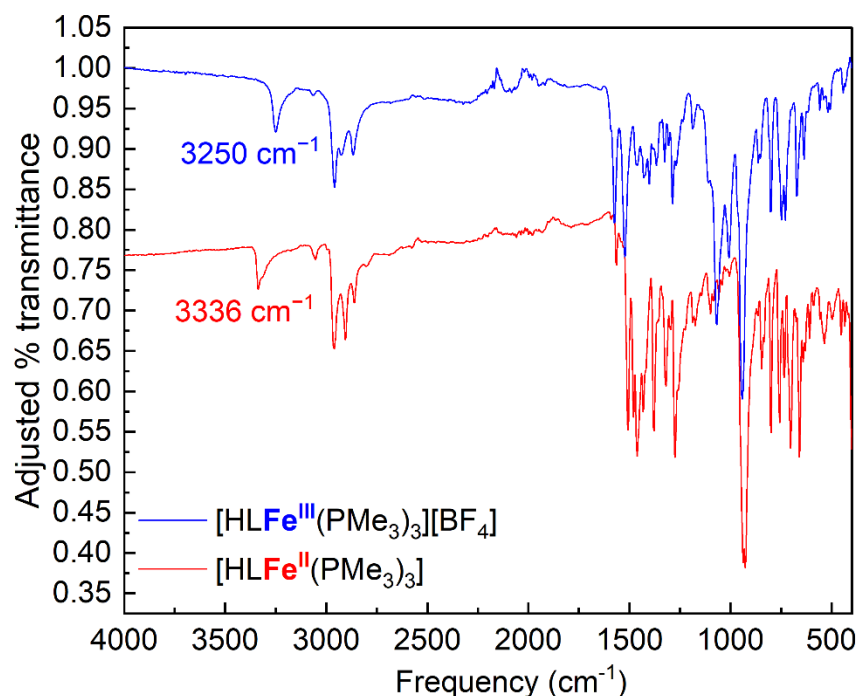

**Figure S79.** FT-IR spectra of solid  $\text{HLFe}^{\text{II}}(\text{PMe}_3)_3$  (**2**, bottom trace) and crude solids (top trace) from the reaction of  $\text{LFe}^{\text{III}}(\text{PMe}_3)_3$  (**4**) with stoichiometric  $[\text{H}(\text{OEt}_2)][\text{BF}_4]$ . The species corresponding to the top trace is tentatively assigned as  $[\text{HLFe}^{\text{III}}(\text{PMe}_3)_3][\text{BF}_4]$ . The top trace shows a peak at  $3250\text{ cm}^{-1}$  that is shifted from the peak at  $3336\text{ cm}^{-1}$  in the bottom trace, which is assigned to the N–H stretch of the monoprotonated thioamide backbone in **2**.

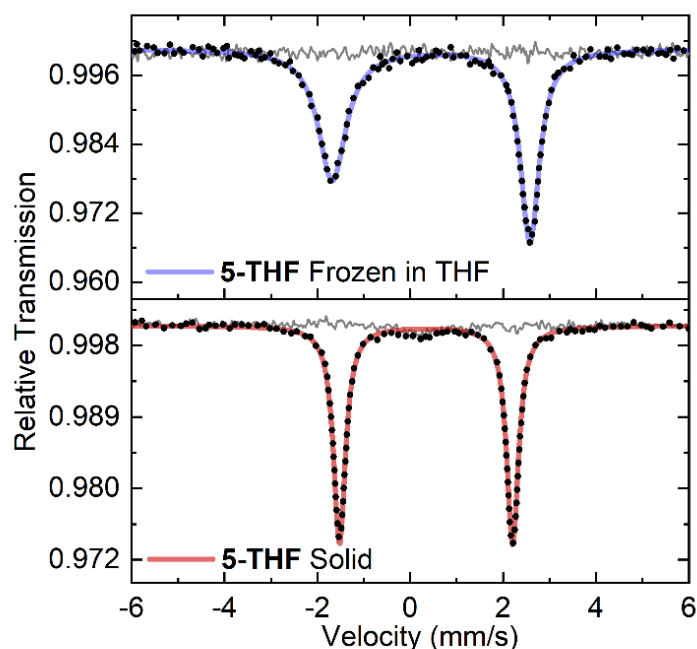

**Figure S80.** The Mössbauer spectra of **5-THF** as a frozen THF solution (top) and as solid **5-THF** (bottom). Parameters for frozen solution spectrum:  $\delta = 0.45\text{ mm/s}$ ,  $|\Delta E_Q| = 4.26\text{ mm/s}$ ,  $\Gamma_L = 0.73\text{ mm/s}$ ,  $\Gamma_R = 0.49\text{ mm/s}$ . Parameters for solid spectrum:  $\delta = 0.34\text{ mm/s}$ ,  $|\Delta E_Q| = 3.73\text{ mm/s}$ ,  $\Gamma = 0.31\text{ mm/s}$ .

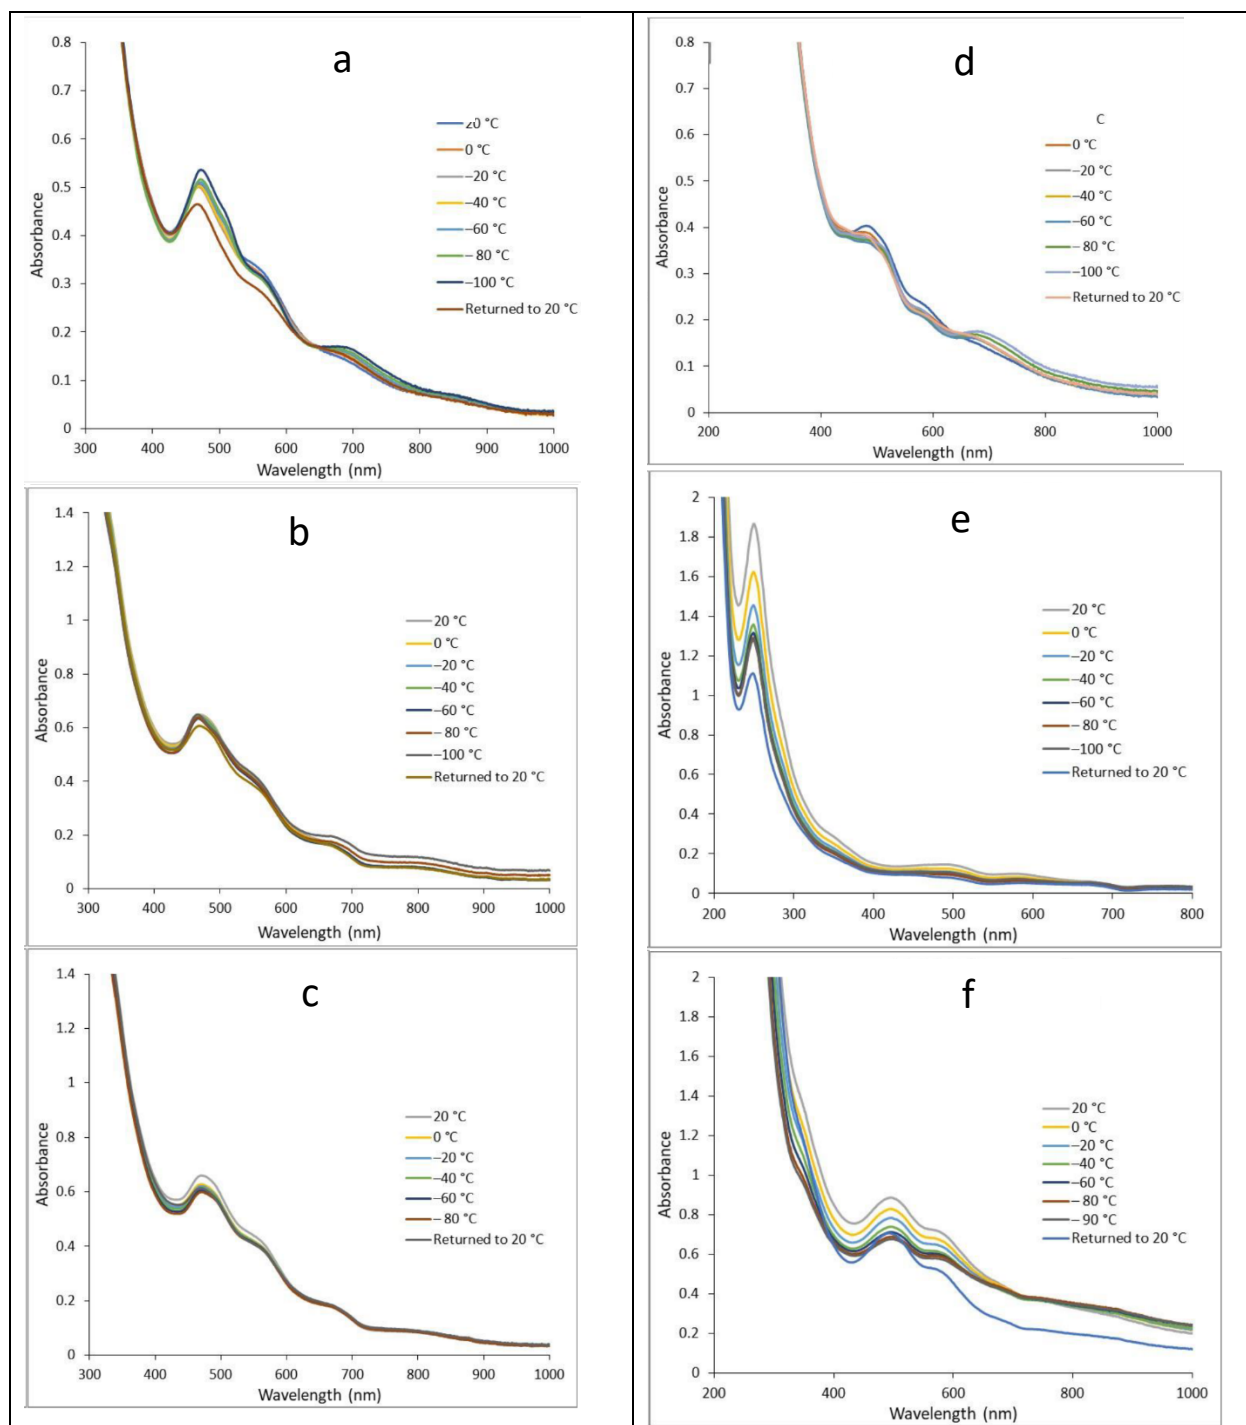

**Figure S81.** Variable temperature UV-Vis spectra of **6** in THF (a), Et<sub>2</sub>O (b), and toluene (c) and analogous spectra after addition of 18-crown-6 (1 equiv per iron) in THF (d), Et<sub>2</sub>O (e), and toluene (f). Each spectrum was corrected for changes in solvent density at low temperature.

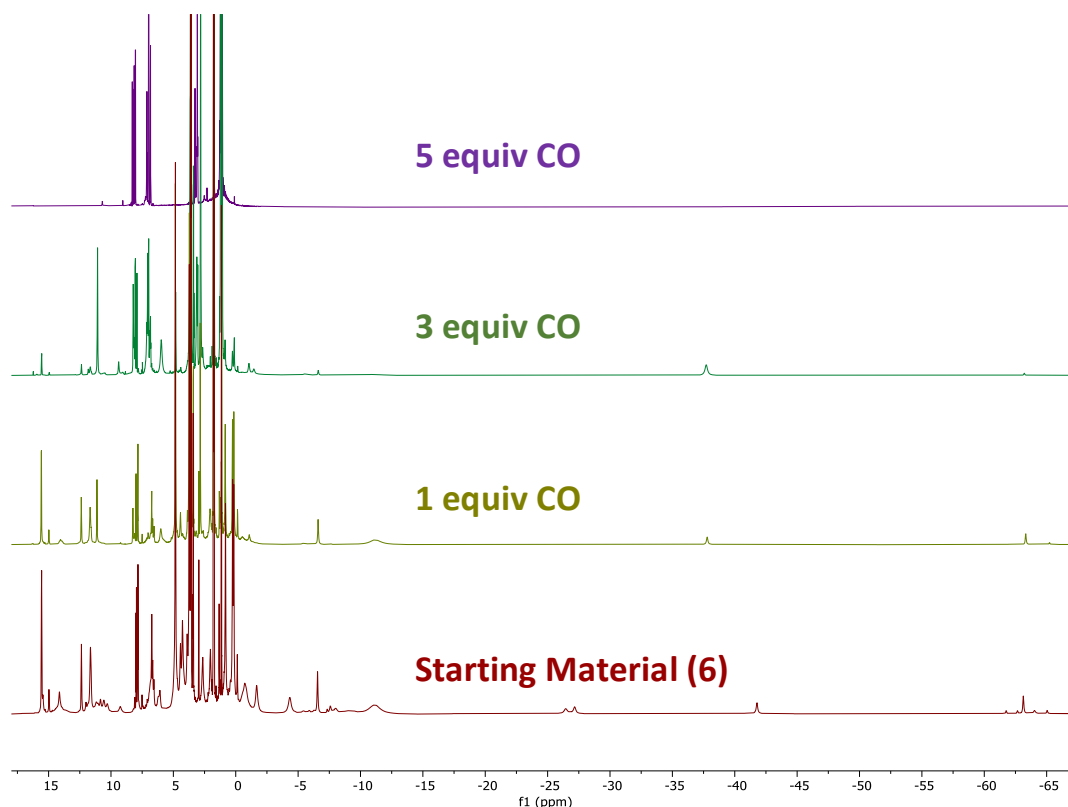

**Figure S82.** In an effort to produce complexes with fewer CO ligands, we treated **6** with substoichiometric CO. As shown in the figure above, this reaction gave solutions with  $^1\text{H}$  NMR spectra (400 MHz,  $\text{THF-}d_8$ ) showing a large number of peaks with chemical shifts indicative of multiple paramagnetic species. Though we were unable to isolate any of these species, the mixture converted to diamagnetic **11** upon addition of greater than three equiv of CO.

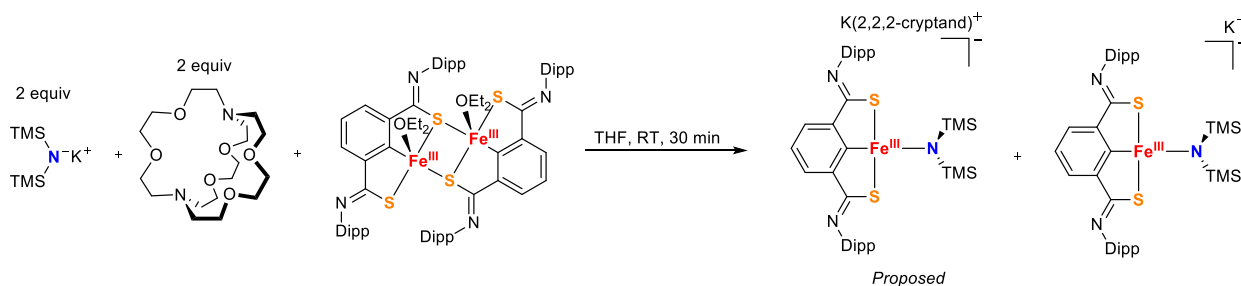

**Scheme S1.** Synthesis of the  $\text{N}(\text{TMS})_2$  adduct in the presence of [2.2.2]cryptand.

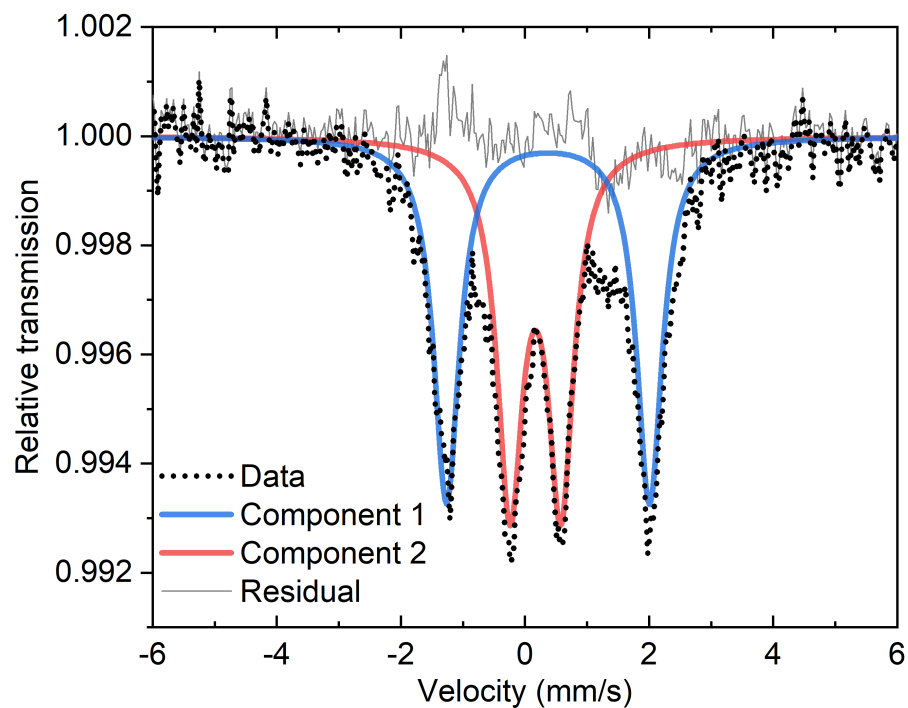

**Figure S83.** Mössbauer spectrum of crude solids from the reaction in Scheme S1. Component 1 (50%):  $\delta = 0.37$  mm/s,  $|\Delta E_Q| = 3.27$  mm/s. Component 2 (50%):  $\delta = 0.17$  mm/s,  $|\Delta E_Q| = 0.82$  mm/s. The 1:1 ratio seems to be coincidental, as repeat reactions of the type in Scheme S1 showed different ratios between Components 1 and 2.

## Computations

DFT calculations were performed using ORCA version 4.2.1. Structures were optimized using the BP86 functional and ZORA-def2-TZVP basis set, and minima were confirmed by the presence of all real frequencies. Mössbauer calculations were then performed on the minimized structures. An example input file which generated Mössbauer parameters and QRO files for plotting is shown below:

```
! UKS B3LYP ZORA ZORA-def2-TZVP SARC/J NORI
! TightSCF SlowConv Grid4 NoFinalGrid
! CPCMC(toluene) UNO UCO MOREAD

%Method SpecialGridAtoms 26
SpecialGridIntAcc 7 end

%pal nprocs 20 end

%scf maxiter 1800 end

%moinp "KLSC1027B.gbwn"

* xyzfile -1 4 L_Dipp_Fe_HMDS_monoanion_BP86_Mult4.xyz

%eprnmr
nuclei = all Fe{fgrad,rho} end
```

When potassium was included in the model, the overall charge was 0 instead of  $-1$ . Structures and surfaces generated from calculations were visualized using Chemcraft version 1.8 (Chemcraft - graphical software for visualization of quantum chemistry computations. <https://www.chemcraftprog.com>). The starting geometry for optimization of models A and B in the main-text Figure 12 was obtained from the crystal structure of **9**, and the molecule in the asymmetric unit containing Fe2 was arbitrarily chosen.

Although the anionic model of thiolate complex **8** was in agreement with experiment, we calculated Mössbauer parameters for optimized **8-crown** with potassium included to evaluate its consistency with experiment. This calculation gave  $\delta = 0.28$  mm/s and  $\Delta E_Q = 3.96$  mm/s, also in agreement with the spectrum of **8-crown** and essentially unchanged from the potassium-free predictions for **8** that are shown in Table 3. Thus, the experimental and computed Mössbauer spectra for the models described above suggest that the amide donor in **9** leads to an unusual situation in which its electronic structure is dependent on the presence of a nearby cation.

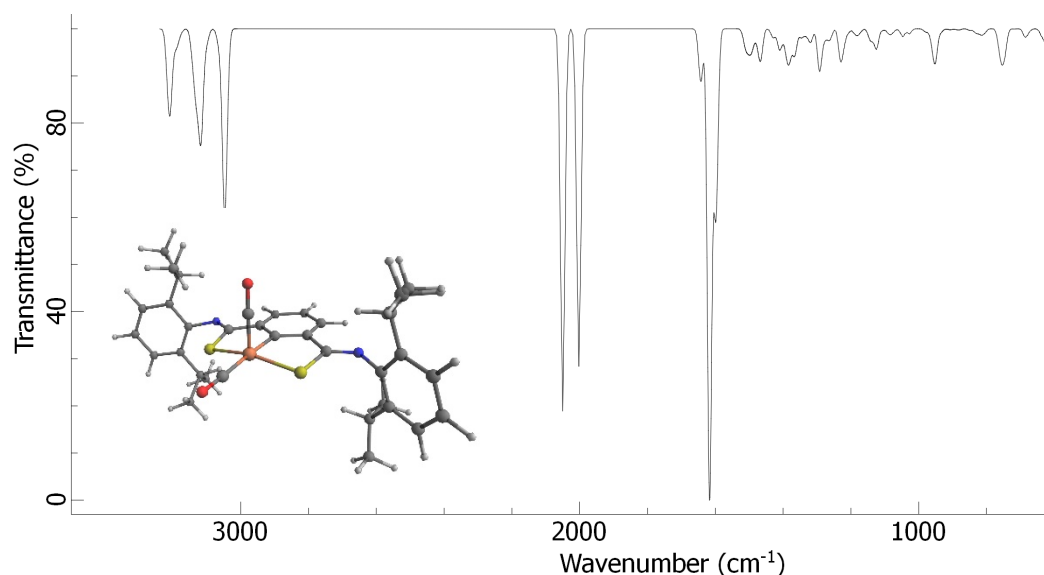

**Figure S84.** Theoretical IR spectrum and structure of optimized  $[\text{LFe}(\text{CO})_2]^-$ . Optimization and vibrational frequency calculations were carried out using BP86/ZORA-def2-TZVP. CO stretching frequencies occur at  $1983\text{ cm}^{-1}$  and  $1773\text{ cm}^{-1}$ .

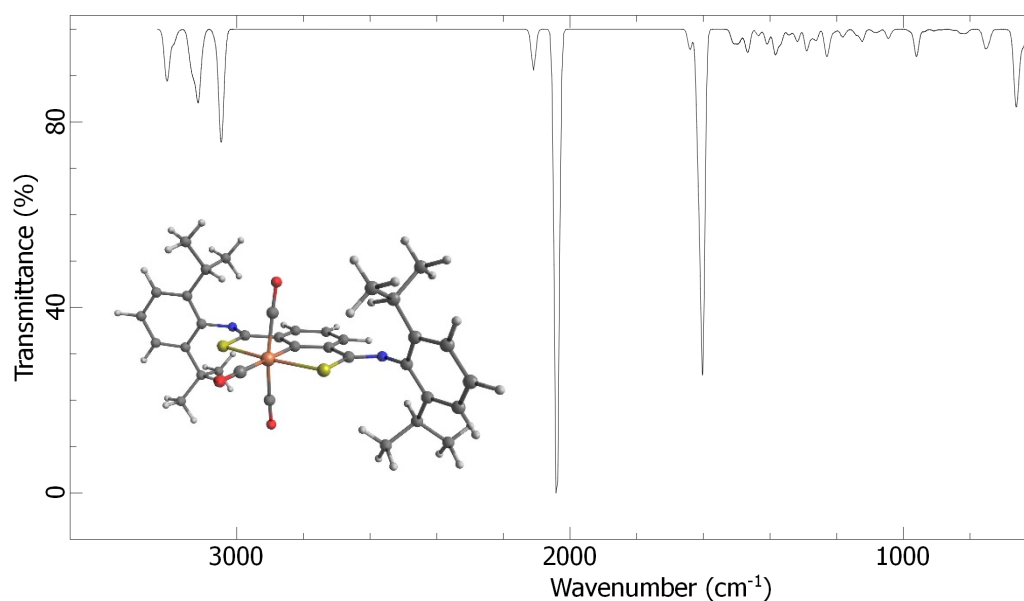

**Figure S85.** Theoretical IR spectrum and structure of optimized  $[\text{LFe}(\text{CO})_3]^-$ . Optimization and vibrational frequency calculations were carried out using BP86/ZORA-def2-TZVP. CO stretching frequencies occur at  $2041\text{ cm}^{-1}$ ,  $1977\text{ cm}^{-1}$ , and  $1970\text{ cm}^{-1}$ .



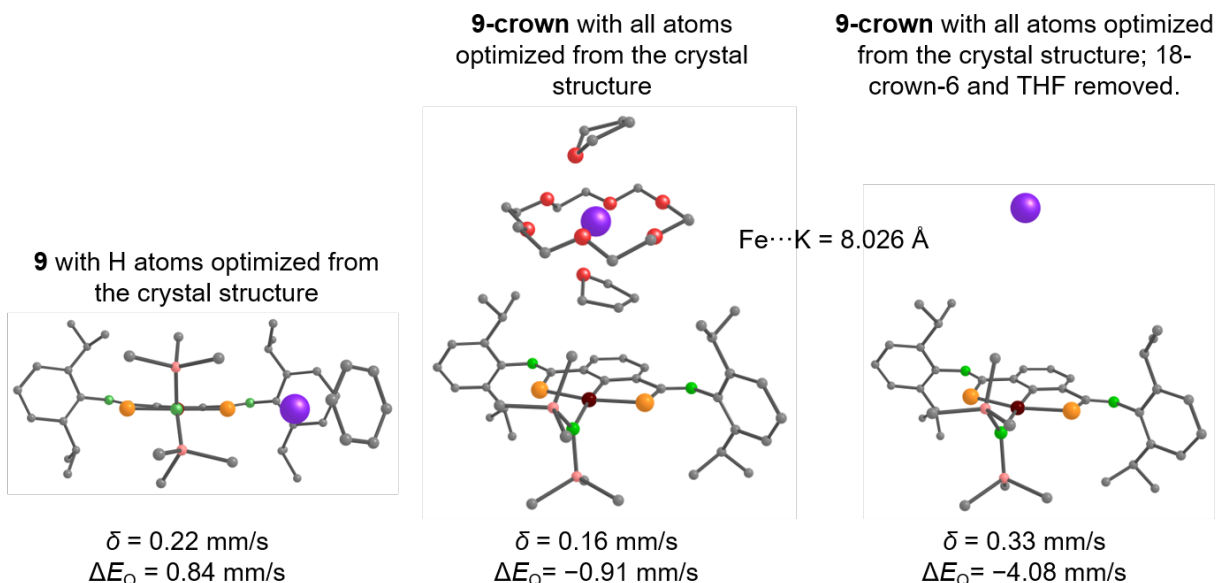

**Figure S86.** Structures and Mössbauer parameters for BP86/ZORA-def2-TZVP-optimized **9** (H atoms only, left), **9-crown** (all atoms, model C in main text, middle) and the analogous complex after removal of THF and 18-crown-6 but without re-optimization (right).

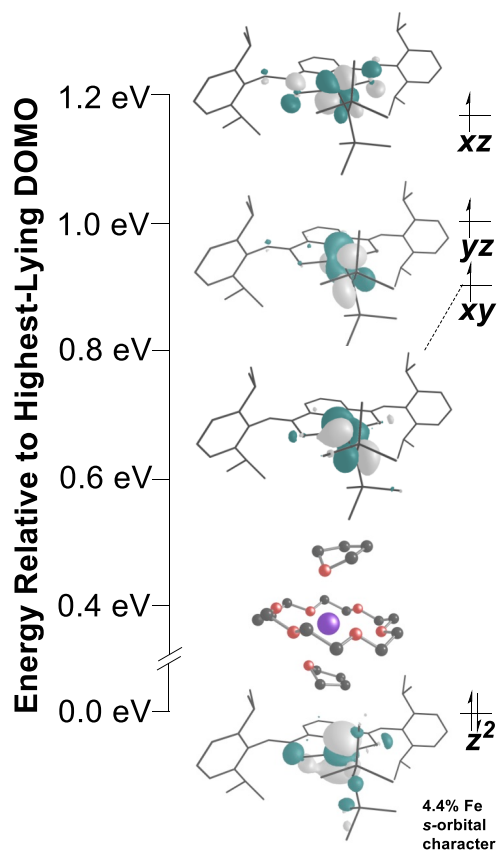

**Figure S87.** QRO plots at an isovalue of 0.03 au of the d-assigned orbitals for optimized **9-crown** (model C in main text).

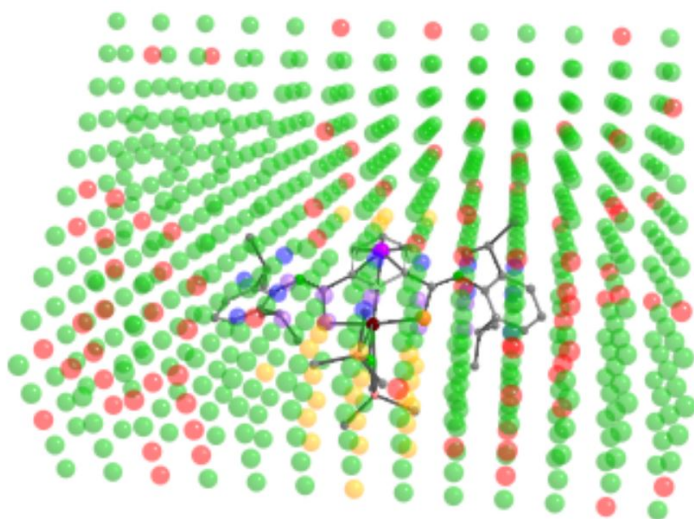

**Figure S88.** Heatmap showing the distribution of quadrupole splitting values generated by placing a point charge  $Q$  with +1 charge at intersecting points in a 3-dimensional  $2 \times 2 \text{ \AA}$  grid on the top face of complex **9**. The geometry of **9** was generated by forcing the  $\text{N}(\text{TMS})_2$  and pincer planes to be  $90^\circ$  to symmetrize the complex so that only one face needed to be sampled. Color key for  $|\Delta E_Q|$  (mm/s):  $< 0.69$ ,  $0.7 - 0.79$ ,  $0.8 - 0.89$ ,  $0.9 - 0.99$ ,  $1 - 1.99$ ,  $> 4$ .

Molecular coordinates used to calculate the Mulliken spin density on the phosphorus atoms of **4** at the BP86/ZORA-def2-TZVP level of theory:

|    |              |             |              |
|----|--------------|-------------|--------------|
| Fe | 17.148977944 | 6.816817752 | 10.933058047 |
| S  | 16.917006764 | 6.829888889 | 13.148991052 |
| S  | 17.109884081 | 6.814247529 | 8.731085360  |
| C  | 15.201923271 | 6.806928868 | 10.850459209 |
| C  | 15.140411655 | 6.824764492 | 13.310842716 |
| C  | 14.422609342 | 6.809619684 | 12.028065228 |
| C  | 13.021304949 | 6.799999176 | 11.971230892 |
| H  | 12.458830035 | 6.802693451 | 12.906988390 |
| C  | 12.371607128 | 6.788733048 | 10.734060489 |
| H  | 11.281588531 | 6.780891430 | 10.688856964 |
| C  | 13.121272389 | 6.791421759 | 9.554652906  |
| H  | 12.636278630 | 6.789834794 | 8.576454565  |
| C  | 14.524279863 | 6.800221659 | 9.612417176  |
| C  | 15.349778398 | 6.827060078 | 8.396420588  |
| N  | 14.535783556 | 6.833068830 | 14.449424289 |
| C  | 15.274023540 | 6.850406418 | 15.647851835 |
| C  | 15.618315192 | 5.626705075 | 16.268980946 |
| C  | 16.257829091 | 5.668660214 | 17.512644345 |
| H  | 16.531104871 | 4.736410401 | 18.008662886 |
| C  | 16.565971239 | 6.885129620 | 18.124063732 |
| H  | 17.063964215 | 6.898799198 | 19.094990144 |
| C  | 16.253762687 | 8.084061124 | 17.480843909 |

|   |              |              |              |
|---|--------------|--------------|--------------|
| H | 16.524296802 | 9.030022676  | 17.951736435 |
| C | 15.613685504 | 8.091378028  | 16.236853222 |
| C | 15.286098380 | 4.320807503  | 15.567495039 |
| H | 15.484589693 | 4.487247099  | 14.495871298 |
| C | 16.155395478 | 3.141232438  | 16.008546937 |
| H | 17.226403554 | 3.381139479  | 15.937337623 |
| H | 15.955004984 | 2.269050288  | 15.369210258 |
| H | 15.943446045 | 2.841234652  | 17.045864052 |
| C | 13.789970995 | 3.990230122  | 15.706746737 |
| H | 13.530700568 | 3.830082318  | 16.764438155 |
| H | 13.538019127 | 3.074959005  | 15.149200879 |
| H | 13.175117437 | 4.813137855  | 15.318492471 |
| C | 15.275798956 | 9.377510858  | 15.502037285 |
| H | 15.477358034 | 9.184891014  | 14.435492344 |
| C | 16.138306372 | 10.572589500 | 15.913961642 |
| H | 15.924094403 | 10.897029917 | 16.943437602 |
| H | 15.933385571 | 11.427457355 | 15.253041178 |
| H | 17.210714073 | 10.337037714 | 15.849239621 |
| C | 13.777832406 | 9.703790300  | 15.630769588 |
| H | 13.167853269 | 8.867584013  | 15.263877198 |
| H | 13.521892781 | 10.602653316 | 15.048896009 |
| H | 13.516751038 | 9.890713722  | 16.683614279 |
| N | 14.843043269 | 6.868680649  | 7.212417830  |
| C | 15.670586648 | 6.947179558  | 6.077070646  |
| C | 16.153162739 | 5.764330169  | 5.469543553  |
| C | 16.912681194 | 5.878385323  | 4.299832815  |
| H | 17.298162896 | 4.977311747  | 3.820077613  |
| C | 17.194601478 | 7.126476163  | 3.741775255  |
| H | 17.793041147 | 7.196769953  | 2.831822588  |
| C | 16.710105293 | 8.284745277  | 4.352516898  |
| H | 16.937953956 | 9.257508235  | 3.914166186  |
| C | 15.943671093 | 8.219559029  | 5.521120446  |
| C | 15.799135538 | 4.418223701  | 6.075688260  |
| H | 15.750987264 | 4.569186144  | 7.164920800  |
| C | 16.837263199 | 3.325998024  | 5.805526246  |
| H | 16.868242674 | 3.046909294  | 4.741628582  |
| H | 16.586993221 | 2.416879089  | 6.372402236  |
| H | 17.845413804 | 3.650079929  | 6.102758829  |
| C | 14.395289992 | 3.980639734  | 5.620365806  |
| H | 13.651187589 | 4.750234355  | 5.868281635  |
| H | 14.100307567 | 3.040997286  | 6.112618945  |
| H | 14.377925030 | 3.820131153  | 4.531507208  |
| C | 15.359901155 | 9.459608217  | 6.176638780  |
| H | 15.340992741 | 9.271388821  | 7.261981898  |
| C | 16.178414990 | 10.731027279 | 5.937379647  |
| H | 17.228150038 | 10.595021166 | 6.236669071  |

|   |              |              |              |
|---|--------------|--------------|--------------|
| H | 15.760308784 | 11.564629380 | 6.521069311  |
| H | 16.163243291 | 11.033497395 | 4.879408828  |
| C | 13.895883566 | 9.645363896  | 5.737690487  |
| H | 13.841170371 | 9.822176077  | 4.652666723  |
| H | 13.438701089 | 10.505301031 | 6.251151343  |
| H | 13.307486523 | 8.747736232  | 5.973088316  |
| P | 16.977926572 | 9.095591683  | 11.049506141 |
| C | 17.377283595 | 10.041715131 | 9.527464782  |
| H | 18.366761919 | 9.775256143  | 9.145156503  |
| H | 17.331734201 | 11.120822644 | 9.729870014  |
| H | 16.641894679 | 9.781917255  | 8.757154515  |
| C | 17.966242907 | 9.949501144  | 12.344292887 |
| H | 19.038493669 | 9.759749820  | 12.219796701 |
| H | 17.659331709 | 9.562844683  | 13.324039286 |
| H | 17.786993278 | 11.032458429 | 12.302239207 |
| C | 15.316410513 | 9.788160301  | 11.407340992 |
| H | 14.611519587 | 9.479254721  | 10.626193255 |
| H | 15.382544677 | 10.884640196 | 11.436249646 |
| H | 14.939785001 | 9.421988912  | 12.368910695 |
| P | 19.389191555 | 6.822175839  | 10.938232553 |
| C | 20.273867858 | 8.193016036  | 10.075653252 |
| H | 19.974725212 | 8.192740706  | 9.018768674  |
| H | 21.360322364 | 8.040346743  | 10.139283232 |
| H | 20.029831279 | 9.168876380  | 10.508662382 |
| C | 20.281096237 | 5.442523391  | 10.096964264 |
| H | 20.036292427 | 4.470904351  | 10.538736333 |
| H | 21.366895736 | 5.598023183  | 10.165126497 |
| H | 19.988343006 | 5.430725650  | 9.038308411  |
| C | 20.214553665 | 6.839090749  | 12.582119438 |
| H | 19.892664767 | 7.725886203  | 13.142791813 |
| H | 21.308871779 | 6.845281433  | 12.480783457 |
| H | 19.904178109 | 5.957496430  | 13.157182737 |
| P | 16.995473201 | 4.539710545  | 11.084983321 |
| C | 17.393351329 | 3.574224330  | 9.574731944  |
| H | 16.627544978 | 3.788907902  | 8.820286696  |
| H | 17.392042622 | 2.498827710  | 9.800887205  |
| H | 18.361205691 | 3.867588297  | 9.158463354  |
| C | 17.994261403 | 3.712966205  | 12.389496512 |
| H | 19.064828214 | 3.908937004  | 12.261222304 |
| H | 17.823297216 | 2.628201381  | 12.363272098 |
| H | 17.684961526 | 4.111322455  | 13.363819270 |
| C | 15.341677128 | 3.836834570  | 11.458514589 |
| H | 14.966812822 | 4.207903492  | 12.418836338 |
| H | 15.417569049 | 2.741216030  | 11.497086254 |
| H | 14.631090214 | 4.132655387  | 10.677504186 |

Molecular coordinates used in the Mössbauer calculation of anionic **8**:

|    |                   |                   |                   |
|----|-------------------|-------------------|-------------------|
| Fe | 16.05940969739237 | 6.94938492996654  | 11.27769740145834 |
| S  | 16.05633452039649 | 4.76291607627825  | 11.62734287824052 |
| S  | 15.95736731606181 | 8.77551883681768  | 10.03741398975629 |
| C  | 17.80804807739701 | 6.64252289349321  | 10.46614474527435 |
| C  | 17.69142718506889 | 4.28472048689620  | 11.10709900205738 |
| C  | 18.48869090826116 | 5.41313385582077  | 10.59680627174721 |
| C  | 19.81979622000088 | 5.27927120133649  | 10.17680085528478 |
| H  | 20.32067683202515 | 4.31650258533656  | 10.29980664038329 |
| C  | 20.47794541222787 | 6.36497443472396  | 9.58905939725453  |
| H  | 21.51750129226232 | 6.26534357424203  | 9.27147730740247  |
| C  | 19.78834455338035 | 7.55954429926539  | 9.35924540399396  |
| H  | 20.26208171322293 | 8.39358233103228  | 8.83739326848216  |
| C  | 18.45752985155783 | 7.69185735896299  | 9.78093678910625  |
| C  | 17.63220079870992 | 8.86160609839000  | 9.43325900395597  |
| N  | 18.11571844387771 | 3.06639632783135  | 11.11029840951498 |
| C  | 17.24933669970682 | 2.00688672040660  | 11.45114002429178 |
| C  | 16.98275936867108 | 1.65816787857960  | 12.79556493170237 |
| C  | 16.13775733782303 | 0.57087686129585  | 13.04981371211853 |
| H  | 15.91654379002354 | 0.30191490430934  | 14.08486855491404 |
| C  | 15.56816690122580 | -0.16564824963391 | 12.01320477211012 |
| H  | 14.90464304406592 | -1.00399517352834 | 12.23362603599107 |
| C  | 15.85928311774921 | 0.17186043885476  | 10.68984365395357 |
| H  | 15.42008450568049 | -0.41077151977741 | 9.87818752819203  |
| C  | 16.69901807397068 | 1.24732900378508  | 10.38624893365996 |
| C  | 17.62027184400753 | 2.41042673664749  | 13.94948502493062 |
| H  | 18.15126481994973 | 3.27010702208898  | 13.52170509278054 |
| C  | 16.57709670132037 | 2.94975821378244  | 14.93803566011020 |
| H  | 15.85376512181922 | 3.59749050652333  | 14.42704855555107 |
| H  | 17.05818817651938 | 3.54110169907206  | 15.73091417171400 |
| H  | 16.02010598773889 | 2.13189198873040  | 15.41999403478683 |
| C  | 18.66374020332294 | 1.53469765443348  | 14.66278414115946 |
| H  | 18.19014883363655 | 0.65585998353490  | 15.12748164758307 |
| H  | 19.17145680247123 | 2.10516297986978  | 15.45604913583913 |
| H  | 19.42479987272842 | 1.17358410072420  | 13.95606315106156 |
| C  | 16.99441277919808 | 1.65008559114658  | 8.95155860762788  |
| H  | 17.97774024371181 | 2.14839031405054  | 8.96700155053836  |
| C  | 15.96861509203222 | 2.68334073672655  | 8.45146080813498  |
| H  | 14.96078693729048 | 2.23972130690775  | 8.42537091873186  |
| H  | 16.22236367060403 | 3.02332807547224  | 7.43549319559712  |
| H  | 15.92932229842346 | 3.55996142792766  | 9.11182380973206  |
| C  | 17.08035928680411 | 0.45997177510414  | 7.98905921158565  |
| H  | 17.79533529577150 | -0.29562822005286 | 8.34638765442863  |
| H  | 17.40870846718347 | 0.80272322695235  | 6.99641412390073  |
| H  | 16.10446020503255 | -0.03180622432246 | 7.85684934283343  |
| N  | 18.08561117692189 | 9.82636614487268  | 8.70557902489521  |

|   |                   |                   |                   |
|---|-------------------|-------------------|-------------------|
| C | 17.22043866404180 | 10.79383047285043 | 8.16326634438594  |
| C | 17.12359879933456 | 12.07463710593404 | 8.75159684254948  |
| C | 16.33903278584143 | 13.04803594048099 | 8.12368902748064  |
| H | 16.25203239647161 | 14.03824578121838 | 8.57412101030701  |
| C | 15.65626886272350 | 12.76805285883051 | 6.94012648909902  |
| H | 15.04428872095426 | 13.53618501778725 | 6.46374015386380  |
| C | 15.74849322464348 | 11.49438901203259 | 6.37440578103167  |
| H | 15.19909294474488 | 11.27750836829583 | 5.45737766936828  |
| C | 16.51831433121108 | 10.48853594880266 | 6.96768971715582  |
| C | 17.89444036767700 | 12.36129673555302 | 10.02433661446611 |
| H | 17.97430276897176 | 11.40447858006864 | 10.55949972132380 |
| C | 17.19951476907915 | 13.35245033122717 | 10.96196912791192 |
| H | 17.15562912951818 | 14.36536608294190 | 10.53302514956101 |
| H | 17.75220289419574 | 13.42374604703318 | 11.91125745623066 |
| H | 16.17186781696060 | 13.03221253354405 | 11.18569134245800 |
| C | 19.32078762678648 | 12.82401006327066 | 9.68113311872480  |
| H | 19.83237062181372 | 12.07231887333107 | 9.06415207711467  |
| H | 19.91596788423265 | 12.98418300851270 | 10.59335912164516 |
| H | 19.29208389660372 | 13.77053996549309 | 9.11886815002747  |
| C | 16.64667578746882 | 9.10300308852754  | 6.35493284737920  |
| H | 16.61493858865352 | 8.38036692062409  | 7.18530514183320  |
| C | 15.50580488569477 | 8.73932523445558  | 5.40156482663068  |
| H | 14.52566671245732 | 8.85589414156905  | 5.88599279350951  |
| H | 15.60689914996968 | 7.69140646818541  | 5.08346436065649  |
| H | 15.51549831837157 | 9.36122418556283  | 4.49272008471822  |
| C | 18.01251729904022 | 8.94726627365623  | 5.66214702464706  |
| H | 18.09754382231170 | 9.64949583752165  | 4.81782334255085  |
| H | 18.13749399283108 | 7.92450110510568  | 5.27510154389160  |
| H | 18.82821589177493 | 9.15188627699028  | 6.36844639629000  |
| S | 14.05782224420042 | 7.13220423348060  | 12.22579054717025 |
| C | 14.41863343821321 | 6.75361691648094  | 13.91652791820890 |
| C | 13.45078657025856 | 6.06023630015042  | 14.68187667484392 |
| C | 13.72977793672874 | 5.72463879573671  | 16.01124296208176 |
| H | 12.97928204121840 | 5.17357230448741  | 16.58191939588681 |
| C | 14.94347333315514 | 6.08238219306149  | 16.60013174398042 |
| H | 15.15201962299420 | 5.81826233193602  | 17.63803810324934 |
| C | 15.88774359076094 | 6.78354916663470  | 15.85050577011287 |
| H | 16.83606777976070 | 7.07819681391899  | 16.30357873626558 |
| C | 15.65051116055730 | 7.12606711111897  | 14.51223092206298 |
| C | 12.14039400002784 | 5.67804797834612  | 14.08221884672711 |
| C | 11.08915847736118 | 6.61492117609863  | 14.05122089577939 |
| C | 9.86104790261037  | 6.24278512621627  | 13.49057735281531 |
| H | 9.04904530833617  | 6.97484863341971  | 13.46288550122107 |
| C | 9.65337016307065  | 4.96710606318794  | 12.95554818417869 |
| C | 10.71493101511867 | 4.05494143656888  | 12.99058927038333 |
| H | 10.58053844864093 | 3.05729772430242  | 12.56284613142130 |

|   |                   |                   |                   |
|---|-------------------|-------------------|-------------------|
| C | 11.95591886214549 | 4.38646159676340  | 13.54632506478327 |
| C | 16.71239934159421 | 7.88498772755995  | 13.78125823607804 |
| C | 16.53177894820053 | 9.26315512399596  | 13.47232906585858 |
| C | 17.59861080827694 | 9.99029882777069  | 12.94180452874752 |
| H | 17.44064809012622 | 11.04483177808744 | 12.70584769179704 |
| C | 18.84995485088864 | 9.41029866045928  | 12.69530892624791 |
| C | 19.02518916264962 | 8.07077919051915  | 13.03375418805711 |
| H | 19.98875448596501 | 7.59191473714186  | 12.84319686047018 |
| C | 17.99431354928245 | 7.30369428521666  | 13.58993073997635 |
| C | 11.29499303382014 | 8.01103665519942  | 14.57834554995114 |
| H | 11.68664502922709 | 8.00147562209746  | 15.60613053027285 |
| H | 10.35597408556290 | 8.58021456411666  | 14.56389774633121 |
| H | 12.03451028829640 | 8.54828853027918  | 13.96364586211479 |
| C | 8.31873347473671  | 4.57657290104869  | 12.37179406712455 |
| H | 7.73798736679126  | 3.96369542799669  | 13.08057950587530 |
| H | 8.44285545055735  | 3.98156691407772  | 11.45533170896514 |
| H | 7.71587318269823  | 5.46235419503744  | 12.12873179847994 |
| C | 13.08610722131813 | 3.39366746989732  | 13.53426157090322 |
| H | 13.94834411299003 | 3.78505183115888  | 12.97237562499607 |
| H | 12.78101112977155 | 2.44717623162167  | 13.06958498671280 |
| H | 13.45060004397180 | 3.17999454990436  | 14.54976088456656 |
| C | 15.21892089234233 | 9.95071755898906  | 13.71095514714835 |
| H | 14.49848532361361 | 9.66759083023163  | 12.92577259519603 |
| H | 15.34185504729507 | 11.04142327914574 | 13.69395423113595 |
| H | 14.77436161984341 | 9.65253482680722  | 14.67109811952738 |
| C | 19.96302326583768 | 10.19193480245469 | 12.05406064764017 |
| H | 19.85770640409142 | 10.17929639583255 | 10.95784081082644 |
| H | 20.94329451409172 | 9.75962094886352  | 12.29683621396176 |
| H | 19.95334164826531 | 11.24409143518710 | 12.37225509661680 |
| C | 18.30829511790979 | 5.89825262439205  | 14.01608537983284 |
| H | 18.80037927829302 | 5.88948864496143  | 15.00246270575048 |
| H | 18.99695931872634 | 5.43007725163290  | 13.30031654562165 |
| H | 17.40721603817661 | 5.28438386512073  | 14.08820629086094 |

Molecular coordinates used in the Mössbauer calculation of **8-crown**:

|    |                   |                  |                   |
|----|-------------------|------------------|-------------------|
| Fe | 16.23261569826193 | 7.51980305964449 | 11.46719297922268 |
| S  | 15.80648230911733 | 5.37019607698867 | 11.67414099314939 |
| S  | 16.37776165141754 | 9.40272778318890 | 10.32734328704656 |
| C  | 17.79130948929521 | 6.94382453711855 | 10.43618628378098 |
| C  | 17.24583993173937 | 4.61344934399202 | 10.93642573072721 |
| C  | 18.20795055298899 | 5.59740884529247 | 10.41029889871756 |
| C  | 19.43087966845594 | 5.23289212464766 | 9.82981742419687  |
| H  | 19.72368597113417 | 4.18087306055524 | 9.83776177990845  |
| C  | 20.23753501881709 | 6.20782141787847 | 9.23378274535477  |
| H  | 21.19509899139656 | 5.92674103740544 | 8.79309271307490  |
| C  | 19.79098088773052 | 7.52942160535225 | 9.15042159114576  |

|   |                   |                   |                   |
|---|-------------------|-------------------|-------------------|
| H | 20.36951120680812 | 8.28833876628090  | 8.61989890495995  |
| C | 18.56863372159572 | 7.89172647314438  | 9.73483634760462  |
| C | 17.95291255539533 | 9.20954892792510  | 9.52687210981245  |
| N | 17.39715032550840 | 3.34317219839722  | 10.80688736169158 |
| C | 16.36063327997297 | 2.45196647850799  | 11.15571959081990 |
| C | 16.12349368118425 | 2.05354625801492  | 12.49079378672071 |
| C | 15.09482012796217 | 1.13679550308459  | 12.73959552180775 |
| H | 14.90146653424880 | 0.82497548247882  | 13.76832679531944 |
| C | 14.31396325146723 | 0.62022782368444  | 11.70894617140177 |
| H | 13.51397435939515 | -0.08952058501533 | 11.92780309053673 |
| C | 14.57181228264149 | 1.00655726845497  | 10.39294786216435 |
| H | 13.96562853897394 | 0.59768452526489  | 9.58331155930415  |
| C | 15.59188664024167 | 1.91242129197894  | 10.09314001311414 |
| C | 16.97436940788666 | 2.56465320247308  | 13.63882078600069 |
| H | 17.66401827720764 | 3.31155619716462  | 13.22540040962587 |
| C | 16.12996374543739 | 3.25095851773459  | 14.72114147423131 |
| H | 15.56716697350078 | 4.09641295370184  | 14.30256237483647 |
| H | 16.76779199757596 | 3.63472740346060  | 15.53073211309087 |
| H | 15.40809481437683 | 2.55234200242136  | 15.17140111296013 |
| C | 17.82866904680026 | 1.43260179772788  | 14.23166970440226 |
| H | 17.19476704331951 | 0.64281770314186  | 14.66290194828181 |
| H | 18.48336674554767 | 1.81389338768844  | 15.03088775972706 |
| H | 18.46045340757308 | 0.97090371685410  | 13.45952469268100 |
| C | 15.86389539497549 | 2.36937956565435  | 8.67069320138941  |
| H | 16.92374422937143 | 2.67166999099417  | 8.64240630127524  |
| C | 15.02359363955200 | 3.61197186134430  | 8.32660992865808  |
| H | 13.94990779849402 | 3.36641691840626  | 8.34970676019037  |
| H | 15.27065210934349 | 3.98004528611644  | 7.31856674285195  |
| H | 15.19450799242004 | 4.42487244946531  | 9.04517869354415  |
| C | 15.65514658232723 | 1.26614493458371  | 7.62713029360584  |
| H | 16.22839265750643 | 0.36213466195240  | 7.87656051293601  |
| H | 15.98059706007171 | 1.61675165797836  | 6.63634541994393  |
| H | 14.59579052726753 | 0.98174801233325  | 7.53702839727924  |
| N | 18.47223226810506 | 10.12034556247766 | 8.77446705411804  |
| C | 17.70536010085818 | 11.20644261702024 | 8.32279090239681  |
| C | 17.62004017415627 | 12.42052975578173 | 9.03782057544478  |
| C | 16.94447356000688 | 13.50044474763048 | 8.45320427510035  |
| H | 16.89920176794851 | 14.45294030096017 | 8.98695641612077  |
| C | 16.33818024640334 | 13.38610205453145 | 7.20441576731388  |
| H | 15.83135646763318 | 14.24359854563409 | 6.75789244030550  |
| C | 16.39244544256659 | 12.16704902031723 | 6.52374184632394  |
| H | 15.91483387764892 | 12.07703087914485 | 5.54661335065536  |
| C | 17.06475681420561 | 11.06578575361810 | 7.05984318363632  |
| C | 18.25339584088997 | 12.55800131866510 | 10.40895327023271 |
| H | 18.57563546855746 | 11.55445096134644 | 10.71508939574911 |
| C | 17.24293418790246 | 13.05500658223984 | 11.45049509256620 |



|   |                   |                   |                   |
|---|-------------------|-------------------|-------------------|
| H | 16.86271357735697 | 14.05721811285966 | 11.20271279599678 |
| H | 17.70895954878166 | 13.12163123064035 | 12.44406881233362 |
| H | 16.39506344040620 | 12.35881026533962 | 11.52064466238283 |
| C | 19.49698527961625 | 13.45856031718571 | 10.35830099405157 |
| H | 20.23173526458548 | 13.07093211115026 | 9.63913332585284  |
| H | 19.97780556365921 | 13.51343524313491 | 11.34698203187853 |
| H | 19.23140570867696 | 14.48295110200611 | 10.05345083324030 |
| C | 17.16178517111906 | 9.73842047201913  | 6.32415576268728  |
| H | 17.04044293695543 | 8.94429417173990  | 7.07840084761379  |
| C | 16.08068062963454 | 9.53106537920116  | 5.26153657424045  |
| H | 15.06918276745020 | 9.64952877959515  | 5.67660673439142  |
| H | 16.15453774432495 | 8.51504737658587  | 4.84831792528612  |
| H | 16.19191360817637 | 10.23334004843795 | 4.42076044643674  |
| C | 18.56098266951964 | 9.57152278073330  | 5.70213676113478  |
| H | 18.72741365234662 | 10.33503188651823 | 4.92676613224320  |
| H | 18.66186382563328 | 8.57899819347734  | 5.23808609026496  |
| H | 19.33868731055342 | 9.67622557145942  | 6.46931963317068  |
| S | 14.41617405633582 | 8.03766641239416  | 12.64807516742026 |
| C | 14.82816969560573 | 7.46920313092408  | 14.26869545652810 |
| C | 13.78823298012180 | 7.00235235665683  | 15.10486117291566 |
| C | 14.09599906566617 | 6.48604598911347  | 16.36765191541383 |
| H | 13.28726055517226 | 6.10380449982547  | 16.99366894779065 |
| C | 15.41526600340197 | 6.45766946126882  | 16.82180657282970 |
| H | 15.65004920576816 | 6.04994666175175  | 17.80543595971783 |
| C | 16.43192973431926 | 6.97227548511591  | 16.01715148287457 |
| H | 17.46148744137568 | 6.98520310937975  | 16.38019555140338 |
| C | 16.16449865730299 | 7.48520395667655  | 14.74135847211185 |
| C | 12.37085880654855 | 7.10116243269605  | 14.65121486649267 |
| C | 11.62130779317460 | 8.23893050167094  | 15.00522363462791 |
| C | 10.29190701885331 | 8.34144654807787  | 14.57666928119341 |
| H | 9.70207336468534  | 9.21013600087707  | 14.88425046852559 |
| C | 9.69447257989766  | 7.34823993502620  | 13.79475095324215 |
| C | 10.45953826322315 | 6.22682881050485  | 13.45386803095281 |
| H | 10.01028679652896 | 5.43337388192273  | 12.84978230545778 |
| C | 11.78652833021256 | 6.08063212618455  | 13.87237326519618 |
| C | 17.28350065061648 | 8.08570229150452  | 13.95098129291277 |
| C | 17.34444697906235 | 9.49885589998218  | 13.78395960108613 |
| C | 18.45321826755151 | 10.06604907060191 | 13.15848155402281 |
| H | 18.48274339709774 | 11.14997811567009 | 13.03703671478093 |
| C | 19.51919442609642 | 9.29419138801808  | 12.67875182287995 |
| C | 19.47594404515516 | 7.91995129434813  | 12.89815681864182 |
| H | 20.29441916552873 | 7.29241526887173  | 12.53790959400286 |
| C | 18.39556757123807 | 7.30262996319056  | 13.54478469039700 |
| C | 12.24474570023711 | 9.33975948056260  | 15.82448583696695 |
| H | 12.59187882224057 | 8.97262098919257  | 16.80084451920075 |
| H | 11.52880027822328 | 10.15511441091257 | 15.99992512678782 |

|   |                   |                   |                   |
|---|-------------------|-------------------|-------------------|
| H | 13.13245370246959 | 9.75331267876438  | 15.32076879209072 |
| C | 8.26555516621240  | 7.47741071028616  | 13.32997901939090 |
| H | 7.70525549981327  | 6.54441660031127  | 13.48875249112568 |
| H | 8.21190718564458  | 7.70026215130969  | 12.25104548208868 |
| H | 7.74244371886737  | 8.28121663316318  | 13.86646456327148 |
| C | 12.58568696147849 | 4.87243969668383  | 13.47593973519180 |
| H | 13.37663870562276 | 5.14804497262486  | 12.76008492439686 |
| H | 11.95459733524282 | 4.10893503261339  | 13.00368980981365 |
| H | 13.09482214061960 | 4.42252612209205  | 14.33901339338185 |
| C | 16.24412638254665 | 10.38934955872211 | 14.28493794903296 |
| H | 15.33772554178417 | 10.25087356914179 | 13.67203528352700 |
| H | 16.54444352894924 | 11.44375220038321 | 14.23810050299222 |
| H | 15.96996490715585 | 10.14295633110807 | 15.32123085916872 |
| C | 20.65081090835436 | 9.92627282735443  | 11.91625218575783 |
| H | 20.40306459497500 | 9.98501176570661  | 10.84365517941079 |
| H | 21.57515784774363 | 9.34030061643172  | 12.00802453001045 |
| H | 20.84985824051926 | 10.95003597704095 | 12.26463359640268 |
| C | 18.48632265983938 | 5.83307413937933  | 13.84058112730715 |
| H | 19.14577129745931 | 5.65801917988285  | 14.70632458740829 |
| H | 18.91791729357195 | 5.29632318701614  | 12.98594515425213 |
| H | 17.50798761734012 | 5.40594140494128  | 14.07088497134768 |
| K | 10.70057004262527 | 12.70451913720456 | 9.60581081114089  |
| O | 12.24969136842699 | 12.36605502117386 | 7.31907315386488  |
| O | 12.76298082145447 | 10.99093927455277 | 9.71613461720437  |
| O | 11.49666090979303 | 11.87767083516150 | 12.12549716688940 |
| O | 8.71860393316725  | 11.70850436888161 | 11.42688194594287 |
| O | 8.07171444474640  | 12.06073849275509 | 8.67749979040569  |
| O | 9.75373628681736  | 13.74177011030134 | 7.07803101496602  |
| C | 13.03415405889812 | 11.16250410486445 | 7.34736221449641  |
| H | 13.79569642686384 | 11.18935262726186 | 6.54946872060347  |
| H | 12.37495400665788 | 10.28830756815458 | 7.18591731924863  |
| C | 13.74209275996879 | 11.06738332463108 | 8.66956562998034  |
| H | 14.39035010246866 | 11.94861858979028 | 8.81283914845068  |
| H | 14.39202768963325 | 10.17602594004350 | 8.68078416328067  |
| C | 13.37771383654938 | 10.90680580085382 | 11.00985709509226 |
| H | 13.95317862757198 | 11.82804488333343 | 11.20991295420212 |
| H | 14.07850599540159 | 10.06038744904646 | 11.04665449410965 |
| C | 12.32324933375947 | 10.69872996330187 | 12.05863777752153 |
| H | 11.72499486316277 | 9.80185881742631  | 11.82646005887842 |
| H | 12.81201072271860 | 10.51987816717193 | 13.03067487765367 |
| C | 10.44413875672246 | 11.76867833497647 | 13.07854997408040 |
| H | 10.13544273210288 | 12.79863555155325 | 13.31305213799457 |
| H | 10.80729584413859 | 11.29000233476836 | 14.00378141624183 |
| C | 9.25448443967724  | 10.99246090260059 | 12.54868687834161 |
| H | 9.54813078037597  | 9.97146038445257  | 12.24901553134767 |
| H | 8.48682269609077  | 10.89780470039156 | 13.33966127540083 |

|   |                   |                   |                   |
|---|-------------------|-------------------|-------------------|
| C | 7.66417736166103  | 10.99730483926956 | 10.78615438944362 |
| H | 6.86394436125252  | 10.75411565880494 | 11.51054476588367 |
| H | 8.04260949247964  | 10.04672170853188 | 10.36507049663732 |
| C | 7.08444920275131  | 11.86084032373073 | 9.69181756866188  |
| H | 6.19514572671832  | 11.36054757800136 | 9.26429500803498  |
| H | 6.76644648487868  | 12.83557986443886 | 10.10760449131178 |
| C | 7.59146654303136  | 12.88130412395521 | 7.61287902282260  |
| H | 7.32906099773662  | 13.88669908217745 | 7.99312706253001  |
| H | 6.68326194856758  | 12.43403869309709 | 7.16636842408910  |
| C | 8.66134783783283  | 12.98692263861800 | 6.55357719944854  |
| H | 8.98092382840679  | 11.97223606079431 | 6.25706942875347  |
| H | 8.24397223380524  | 13.49185414839121 | 5.66186867578508  |
| C | 10.84257305962026 | 13.88453956850382 | 6.15632351824293  |
| H | 11.45131921534484 | 14.70739937795778 | 6.55418153379422  |
| H | 10.46470450802451 | 14.17396931245228 | 5.15882123225650  |
| C | 11.70301756537028 | 12.63952626860283 | 6.03975572943441  |
| H | 12.50631387007568 | 12.82845082164499 | 5.30086716223627  |
| H | 11.11851062746003 | 11.77291018792665 | 5.67265364249094  |
| C | 10.35963951846682 | 17.02432089120214 | 10.37529392955837 |
| H | 9.77862789837759  | 16.99906399563814 | 9.44273361171283  |
| H | 10.66103820558789 | 18.07055089537587 | 10.54331815400525 |
| H | 9.69833273842186  | 16.73916849811989 | 11.20523289567969 |
| C | 11.56590482626929 | 16.12416222861218 | 10.29742640940631 |
| C | 12.24476360021194 | 15.93511659988498 | 9.08121519851688  |
| H | 11.87546006481373 | 16.43801251382055 | 8.18440542772875  |
| C | 13.38081281020240 | 15.12442120996695 | 9.00933580303609  |
| H | 13.88989816643608 | 14.96869264750259 | 8.05772032634694  |
| C | 13.86384168662087 | 14.48911318743700 | 10.15648437987392 |
| H | 14.74687897230447 | 13.85206070423578 | 10.09233469313636 |
| C | 13.20053294283879 | 14.66757662950532 | 11.37346566974905 |
| H | 13.55767273251705 | 14.15985535786474 | 12.26960896814803 |
| C | 12.06033548331130 | 15.47488941624203 | 11.44075052793425 |
| H | 11.54568207932195 | 15.60559078821403 | 12.39541316992374 |

Molecular coordinates used in the Mössbauer calculation of anionic **9**:

|    |                   |                  |                   |
|----|-------------------|------------------|-------------------|
| Fe | -4.62896158122040 | 3.16058078883923 | 0.32372846563977  |
| S  | -3.82400388122275 | 4.41813120319837 | -1.32417516379727 |
| S  | -5.73763199145450 | 2.10190520049939 | 1.93420461000402  |
| C  | -6.28365709902786 | 4.24850142839822 | 0.12672895072335  |
| C  | -5.22103008395941 | 5.42981139124987 | -1.75037949363479 |
| C  | -6.38581107364316 | 5.24434577021489 | -0.86475744440806 |
| C  | -7.55244408660341 | 6.01024130798168 | -1.01041776228274 |
| H  | -7.59178099383985 | 6.76503809447819 | -1.79816783319070 |
| C  | -8.63530299348868 | 5.79654166740453 | -0.15384625154204 |
| H  | -9.54212212966809 | 6.39480424181162 | -0.26151239924655 |
| C  | -8.55882521452917 | 4.81691321702657 | 0.83933270025562  |

|   |                   |                   |                   |
|---|-------------------|-------------------|-------------------|
| H | -9.39170598566908 | 4.63421403110336  | 1.52113133902386  |
| C | -7.39349244190805 | 4.04684805977191  | 0.97151184697205  |
| C | -7.26946023030734 | 2.99973005660226  | 2.00242751996754  |
| N | -5.24885792055537 | 6.25419024648798  | -2.74072579112613 |
| C | -4.17398805548073 | 6.36993674637856  | -3.63711279146731 |
| C | -3.95903456609637 | 5.38689257651214  | -4.63501402115763 |
| C | -2.93674287135943 | 5.59852843933452  | -5.56738044145529 |
| H | -2.76402606966708 | 4.85141441950583  | -6.34504951191151 |
| C | -2.13510401275324 | 6.73895175233824  | -5.52351203882387 |
| H | -1.33939167127459 | 6.88031825176901  | -6.25730118452310 |
| C | -2.35926912571971 | 7.70076934951096  | -4.53642192771737 |
| H | -1.73127184381540 | 8.59276084610128  | -4.50461001257690 |
| C | -3.37436796617882 | 7.53884226314719  | -3.58876867288677 |
| C | -4.84826655996010 | 4.15909204864616  | -4.74151809442627 |
| H | -5.43348222237907 | 4.08805035116264  | -3.81572014446085 |
| C | -4.04220677371658 | 2.86026225430555  | -4.86651613083341 |
| H | -3.45719969935214 | 2.82972197999705  | -5.79853702386937 |
| H | -4.71727240951492 | 1.99147115375039  | -4.86814812688126 |
| H | -3.35118352018818 | 2.75239855588554  | -4.02018437734942 |
| C | -5.84080165163875 | 4.31742640090711  | -5.90636664826811 |
| H | -6.44271794824341 | 5.22945025066184  | -5.78606291917473 |
| H | -6.52354755866671 | 3.45522247869529  | -5.95569793095499 |
| H | -5.30703725662807 | 4.38697211485652  | -6.86727304366194 |
| C | -3.61202459936049 | 8.54582576492920  | -2.47856629924315 |
| H | -4.68180546483876 | 8.47235727365421  | -2.22076497684858 |
| C | -2.81260917856458 | 8.15886337059835  | -1.22079362468847 |
| H | -3.04050036239991 | 7.13230521139778  | -0.90271479841785 |
| H | -3.04125329765716 | 8.84091858335499  | -0.38714149603487 |
| H | -1.73167982956880 | 8.21418255218107  | -1.42526988492149 |
| C | -3.31624996081452 | 9.99326307893184  | -2.88673169038497 |
| H | -2.24145297134986 | 10.15667590313148 | -3.06010168496511 |
| H | -3.62408191280399 | 10.68155081432193 | -2.08548162270287 |
| H | -3.85420527324765 | 10.27128055577308 | -3.80485601066128 |
| N | -8.20364685847210 | 2.78164508365480  | 2.86379834246517  |
| C | -8.04986831756053 | 1.82647461288914  | 3.88297228654147  |
| C | -7.27136816791997 | 2.11744604829768  | 5.03007015981843  |
| C | -7.21272406104105 | 1.16464489924399  | 6.05369177689930  |
| H | -6.61454671146181 | 1.37574914296068  | 6.94291890140300  |
| C | -7.89660332898556 | -0.04749205802037 | 5.95960358279343  |
| H | -7.83099762494172 | -0.77953684626141 | 6.76668057309338  |
| C | -8.66951686234096 | -0.31652579653691 | 4.82820201195481  |
| H | -9.20643625522712 | -1.26413121872622 | 4.75636145539095  |
| C | -8.76392880490232 | 0.60698447575043  | 3.78265075615278  |
| C | -6.55825268171274 | 3.45091801901101  | 5.18228048668342  |
| H | -6.59243852402448 | 3.95916731830189  | 4.21008980084253  |
| C | -5.08017793401499 | 3.28629215821218  | 5.55789561867304  |

|    |                    |                   |                   |
|----|--------------------|-------------------|-------------------|
| H  | -4.96017915872662  | 2.83640295952161  | 6.55537754628026  |
| H  | -4.57775693595617  | 4.26507952093468  | 5.56927812320391  |
| H  | -4.56597110754354  | 2.64991453003353  | 4.82641988944280  |
| C  | -7.29775862478309  | 4.34027805468665  | 6.19672982227680  |
| H  | -8.34404223496276  | 4.49333258330289  | 5.89542014121230  |
| H  | -6.81372166900917  | 5.32586354882563  | 6.27674428704742  |
| H  | -7.29707624058211  | 3.87665868437828  | 7.19576001547230  |
| C  | -9.56218324670522  | 0.32113658503408  | 2.52356383267258  |
| H  | -9.86379313376349  | 1.30254396801408  | 2.12159701629288  |
| C  | -8.67450445670633  | -0.35261152237465 | 1.46142413036627  |
| H  | -7.77656277344040  | 0.24592611664216  | 1.25597747964559  |
| H  | -9.22770477981178  | -0.48684951952857 | 0.51893008393769  |
| H  | -8.34500508875757  | -1.34360804734648 | 1.81206788398722  |
| C  | -10.82890257420738 | -0.50373070209349 | 2.77810639372470  |
| H  | -10.58818723170552 | -1.52799860627655 | 3.10200809708297  |
| H  | -11.42056356130601 | -0.58477089936912 | 1.85400607784900  |
| H  | -11.45979029003263 | -0.04255097958191 | 3.55195368228132  |
| N  | -3.06501305221359  | 2.14576850102563  | 0.52431612215886  |
| Si | -2.79083038807731  | 0.91195775206467  | -0.66826729761278 |
| Si | -2.06678303882194  | 2.53636827132084  | 1.89232051475541  |
| C  | -4.37812223842058  | 0.51092658294602  | -1.59886156977064 |
| H  | -5.17379769980190  | 0.20555759394466  | -0.90378328704358 |
| H  | -4.20890215248601  | -0.30601589003989 | -2.31902231084148 |
| H  | -4.73328944798820  | 1.39200941052633  | -2.15226101132510 |
| C  | -1.49561368838841  | 1.49468337920394  | -1.91146891597603 |
| H  | -1.80122075035160  | 2.46067114012067  | -2.33916743230895 |
| H  | -1.37651053695120  | 0.77315062133534  | -2.73485897543922 |
| H  | -0.51762470382937  | 1.63445585194535  | -1.42902246191717 |
| C  | -2.17030517186511  | -0.67571870155681 | 0.15005264195145  |
| H  | -1.22222072519322  | -0.51105280215019 | 0.68330198924909  |
| H  | -2.00138005531555  | -1.46073305966774 | -0.60378285963595 |
| H  | -2.90544326410670  | -1.04987400884551 | 0.87782090793639  |
| C  | -2.50114695570335  | 4.23699493983780  | 2.57512655165159  |
| H  | -2.39988230567588  | 5.00859400652165  | 1.79802745334117  |
| H  | -1.83816508072659  | 4.49725617534156  | 3.41627545909419  |
| H  | -3.54001410902897  | 4.25505247776728  | 2.93459431096781  |
| C  | -2.31256035064614  | 1.25948870066352  | 3.26081786667944  |
| H  | -3.38328504464556  | 1.16715938560185  | 3.49437611398063  |
| H  | -1.78206123471876  | 1.55443148063924  | 4.17975749179061  |
| H  | -1.94773040253785  | 0.26862277327445  | 2.95457768761230  |
| C  | -0.23952741900987  | 2.55224951155966  | 1.40454412769822  |
| H  | 0.08538654687600   | 1.57795587247879  | 1.01021578526867  |
| H  | 0.38985558565492   | 2.78998009002954  | 2.27670486713859  |
| H  | -0.05092973508579  | 3.30993278372370  | 0.62959881301949  |

Molecular coordinates used in the Mössbauer calculation of H-atom-optimized **9** with K<sup>+</sup>:

|    |                   |                   |                   |
|----|-------------------|-------------------|-------------------|
| Fe | 1.13255015575123  | 13.11179500069756 | 4.02417670236894  |
| K  | 6.13326975351879  | 13.18947739280974 | 4.45307774437389  |
| S  | 3.09252491869167  | 13.74252086132440 | 4.92154901014257  |
| S  | -0.99542458419372 | 12.71520543139746 | 3.44822135231811  |
| C  | 0.34404698928345  | 14.25894600211729 | 5.48129946663226  |
| C  | 2.61144143204454  | 14.74529570434458 | 6.29600002114180  |
| C  | 1.15487736521336  | 14.96399693391710 | 6.39029347243766  |
| C  | 0.59920712421773  | 15.80677946470423 | 7.35366233353631  |
| H  | 1.26510690900478  | 16.34011992022345 | 8.03468239925498  |
| C  | -0.77830943552258 | 15.94751509400592 | 7.43352982553686  |
| H  | -1.21530579872923 | 16.61453306801726 | 8.17915468597247  |
| C  | -1.60516320783624 | 15.22747666550157 | 6.57923240032150  |
| H  | -2.69302611005206 | 15.30061169503920 | 6.64435527005259  |
| C  | -1.05199682298397 | 14.38629490530882 | 5.62126152206224  |
| C  | -1.89656764046339 | 13.56052781306532 | 4.71459380700260  |
| N  | 3.42090562941109  | 15.21373626536138 | 7.17938221286670  |
| C  | 4.80673041683227  | 14.91768490149441 | 7.04667779932390  |
| C  | 5.64892731196997  | 15.84466746044266 | 6.40300575556099  |
| C  | 7.01609595981980  | 15.56143972537210 | 6.35808598771937  |
| H  | 7.69093116312282  | 16.26690150452694 | 5.87074704952090  |
| C  | 7.53965010607681  | 14.41341957970658 | 6.93251406811622  |
| H  | 8.61576331303933  | 14.23112465916602 | 6.90539030245854  |
| C  | 6.69634337743769  | 13.51403375278206 | 7.56897510624317  |
| H  | 7.11230405222638  | 12.61701846031277 | 8.03030578205754  |
| C  | 5.31519091039521  | 13.74126244553535 | 7.63520802313690  |
| C  | 5.06560074315595  | 17.13095927581355 | 5.83329186064329  |
| H  | 4.06934716259595  | 16.90235489397519 | 5.42790459211249  |
| C  | 5.93922848709813  | 17.74077745487399 | 4.71085675221767  |
| H  | 6.90291824094990  | 18.09572899322783 | 5.10192018364279  |
| H  | 5.42487974174305  | 18.60679507296862 | 4.27272408901299  |
| H  | 6.13761919988861  | 17.02290659829146 | 3.90043769654434  |
| C  | 4.94786125985894  | 18.17420802072214 | 6.91733322798959  |
| H  | 4.31938172088100  | 17.82443345755156 | 7.74853940976684  |
| H  | 4.50205902715947  | 19.09957514990873 | 6.52420579366302  |
| H  | 5.94045063834386  | 18.42287348528771 | 7.32325940420365  |
| C  | 4.39867447986497  | 12.75967371074385 | 8.36205855987485  |
| H  | 3.39634193345449  | 12.88490918466197 | 7.92658019685830  |
| C  | 4.80131995183430  | 11.30430234870631 | 8.16523359847062  |
| H  | 4.87738109968980  | 11.04688422946905 | 7.09703607883581  |
| H  | 4.04599695867544  | 10.64062751159624 | 8.60844426614295  |
| H  | 5.76254977612287  | 11.06642290303857 | 8.64663617330629  |
| C  | 4.30635969804152  | 13.10798530697382 | 9.84517569593702  |
| H  | 5.28952147236423  | 13.01330251735370 | 10.33292990943298 |
| H  | 3.60395190502109  | 12.43493159848350 | 10.35793939993993 |
| H  | 3.95575005439810  | 14.13941981020399 | 9.98712811732091  |
| N  | -3.15873249412684 | 13.48276048354550 | 4.89790876527524  |

|    |                   |                   |                  |
|----|-------------------|-------------------|------------------|
| C  | -3.96944586636949 | 12.66743526990139 | 4.05715630135882 |
| C  | -4.37797034480129 | 13.14015451873925 | 2.79504706989055 |
| C  | -5.22932882275714 | 12.32553856178066 | 2.03337136292541 |
| H  | -5.54958816158763 | 12.66920664077017 | 1.04782078994626 |
| C  | -5.67698915197238 | 11.11319329239982 | 2.51347393349835 |
| H  | -6.33985682197689 | 10.49695519084860 | 1.90182316969580 |
| C  | -5.29987999294637 | 10.67355730603816 | 3.77315295100338 |
| H  | -5.67373350927161 | 9.71987265460841  | 4.14563420928701 |
| C  | -4.44442008894897 | 11.43889090043189 | 4.57624952479727 |
| C  | -3.97467720575365 | 14.51806658116268 | 2.28605711346061 |
| H  | -3.14542757420376 | 14.86133044684082 | 2.92246259488353 |
| C  | -5.10936104969812 | 15.48815741889425 | 2.45265023506572 |
| H  | -5.97501675622513 | 15.19752047773341 | 1.83573430035216 |
| H  | -4.81202954322258 | 16.50475898169724 | 2.14915588347925 |
| H  | -5.45151849383151 | 15.53428031709607 | 3.49683602565401 |
| C  | -3.46577489190881 | 14.52998559605782 | 0.85754031099903 |
| H  | -2.62650206864790 | 13.83098239647260 | 0.73018044939968 |
| H  | -3.11704275872828 | 15.53772803012900 | 0.58669463763211 |
| H  | -4.25052698280007 | 14.25124518243922 | 0.13648331215566 |
| C  | -4.00196570942574 | 10.97323301639711 | 5.95597533336543 |
| H  | -3.90909809279336 | 11.88471721948306 | 6.57141622914092 |
| C  | -2.61180628113408 | 10.31221660847278 | 5.91061056102725 |
| H  | -2.64536661599009 | 9.39710704131729  | 5.29965189521292 |
| H  | -2.28271016731490 | 10.03781272284353 | 6.92418364191454 |
| H  | -1.85856197157470 | 10.97683753072048 | 5.46891880815383 |
| C  | -4.99407353752982 | 10.02348973943703 | 6.63917106480368 |
| H  | -6.01014623856920 | 10.44332032755403 | 6.66356891793478 |
| H  | -4.67614917010613 | 9.83270655228564  | 7.67420244271397 |
| H  | -5.04025782287116 | 9.04989779012028  | 6.12860212921162 |
| N  | 1.93415476299925  | 11.98630889349701 | 2.72195324683257 |
| Si | 2.16431221016405  | 10.34240530369402 | 3.20220170819458 |
| Si | 2.53372628097050  | 12.68766255701127 | 1.26362853466470 |
| C  | 3.97352331272580  | 9.88296483307632  | 3.06279834837563 |
| H  | 4.36835780464394  | 10.04360892373420 | 2.04827190967788 |
| H  | 4.14365843552303  | 8.82746373345251  | 3.32606712596311 |
| H  | 4.56943358764578  | 10.49681065012184 | 3.75749553576561 |
| C  | 1.14208372620387  | 9.18689798736133  | 2.16105739410501 |
| H  | 0.08539501292457  | 9.49053108844186  | 2.21241088023556 |
| H  | 1.21219495607404  | 8.15410315215148  | 2.53700338413394 |
| H  | 1.43689492921835  | 9.18165474871244  | 1.10291598255842 |
| C  | 1.64944665626912  | 10.06501429685119 | 4.97911502826812 |
| H  | 2.21022406943954  | 10.70289089136985 | 5.67745674391156 |
| H  | 1.81589183366559  | 9.01279096879511  | 5.26346745902049 |
| H  | 0.58099854065634  | 10.28650554310815 | 5.11370517603428 |
| C  | 4.28975935679982  | 13.34653782300401 | 1.50247468582896 |
| H  | 4.28154329245860  | 14.12157512951351 | 2.28452171546444 |

|   |                   |                   |                   |
|---|-------------------|-------------------|-------------------|
| H | 4.68472625495106  | 13.79491178218542 | 0.57813355057510  |
| H | 4.97430003730568  | 12.53502882045010 | 1.79852343770184  |
| C | 2.59894626960036  | 11.43996930700740 | -0.13396575685686 |
| H | 3.23217532580259  | 10.56934757235386 | 0.09147524717608  |
| H | 3.00382676044893  | 11.91430227816885 | -1.04192824910612 |
| H | 1.59416265061608  | 11.06708038496830 | -0.37547494459193 |
| C | 1.46050135451132  | 14.11982382134615 | 0.73748253003813  |
| H | 0.41156006427358  | 13.80351610990793 | 0.64755775658416  |
| H | 1.78470074236020  | 14.53011680591554 | -0.23159689611171 |
| H | 1.48930300024291  | 14.92975463557712 | 1.48174245211201  |
| C | 9.34655027892362  | 12.67415104107500 | 4.06468996433233  |
| C | 8.93802582415547  | 13.14687028430655 | 2.80258075532333  |
| C | 8.08666736914568  | 12.33225434485893 | 2.04090500537666  |
| C | 7.63900704222550  | 11.11990905764795 | 2.52100759703731  |
| C | 8.01611620632454  | 10.68027306387807 | 3.78068663382623  |
| C | 8.87157609725655  | 11.44560669027829 | 4.58378319657472  |
| H | 7.64254139122897  | 9.72340150780193  | 4.14875060225755  |
| H | 6.97434584927077  | 10.50476526064846 | 1.91324594267628  |
| H | 7.76890648724161  | 12.66821688963312 | 1.05252236781425  |
| H | 9.29801895226303  | 14.10122815389851 | 2.42077304237363  |
| H | 10.02363234106621 | 13.28039225555495 | 4.66900075836079  |
| H | 9.18040228007325  | 11.10343838139625 | 5.57020907717681  |

Molecular coordinates used in the Mössbauer calculation of all-atom-optimized **9** with K<sup>+</sup>:

|    |                   |                   |                  |
|----|-------------------|-------------------|------------------|
| Fe | 1.28574108301034  | 13.41200907255977 | 4.07403069244242 |
| K  | 4.92995058747031  | 12.39190139554651 | 4.22305709168555 |
| S  | 3.06837520189276  | 14.68527056111568 | 4.58337391826944 |
| S  | -0.73459758056175 | 12.68210150947038 | 3.62091606068901 |
| C  | 0.43136338357807  | 14.33765123022162 | 5.60700817327306 |
| C  | 2.65679865777388  | 15.10840627887121 | 6.27056942455563 |
| C  | 1.21085542946515  | 15.06033776988347 | 6.53206289288332 |
| C  | 0.63245322305337  | 15.67258570750650 | 7.65258242806084 |
| H  | 1.27366527434955  | 16.20469318435540 | 8.35730506353861 |
| C  | -0.74989889519877 | 15.59952250137149 | 7.84256845662960 |
| H  | -1.20785543873216 | 16.08796998506648 | 8.70401823057037 |
| C  | -1.54615309768919 | 14.90306792069515 | 6.93136039355677 |
| H  | -2.62855407793626 | 14.83373622179079 | 7.05658119622515 |
| C  | -0.95484588974723 | 14.26417242452164 | 5.83126820297443 |
| C  | -1.74007768817030 | 13.47532902070020 | 4.87000356604286 |
| N  | 3.53015730040486  | 15.38332220182552 | 7.16978354598105 |
| C  | 4.90381845207142  | 15.24936346060828 | 6.91781053369886 |
| C  | 5.65329998924846  | 16.32672349744512 | 6.39176316644698 |
| C  | 7.03397566817334  | 16.16016070307153 | 6.23292171808786 |
| H  | 7.62739879317345  | 16.97971548603910 | 5.82637774179815 |
| C  | 7.66559887220376  | 14.96622257867445 | 6.58285306430959 |
| H  | 8.74661463856225  | 14.86404363127674 | 6.46814082447983 |



|   |                   |                   |                  |
|---|-------------------|-------------------|------------------|
| C | 6.91135399245563  | 13.90629347213210 | 7.09013418931889 |
| H | 7.40820814004161  | 12.97678466802688 | 7.36880693620252 |
| C | 5.52681597293477  | 14.02020630351720 | 7.25962910597063 |
| C | 4.94371144505183  | 17.62367897029388 | 6.04648188829866 |
| H | 3.96967098037298  | 17.34774181540880 | 5.61199092148471 |
| C | 5.68115893931039  | 18.47279989762108 | 5.00881846999147 |
| H | 6.62313542418795  | 18.88098214886631 | 5.40524430221697 |
| H | 5.05816237823243  | 19.32785985174587 | 4.71096903202459 |
| H | 5.91195339608475  | 17.89056599181538 | 4.10501575040736 |
| C | 4.66297215390858  | 18.42810901173259 | 7.32872022712847 |
| H | 4.09076984153366  | 17.82695686257291 | 8.04758125534311 |
| H | 4.08574357537909  | 19.33601071278371 | 7.09973114472685 |
| H | 5.60723942230805  | 18.73155474912519 | 7.80564883048051 |
| C | 4.67624428135578  | 12.87758257388970 | 7.79534585789759 |
| H | 3.75735428319238  | 12.84781893331875 | 7.18145169920946 |
| C | 5.34708958975387  | 11.50200126607906 | 7.70900885729862 |
| H | 5.73412630972555  | 11.26684354250050 | 6.70382574662327 |
| H | 4.62945827737572  | 10.71543632660120 | 7.98034302549542 |
| H | 6.20003836344138  | 11.42463667019474 | 8.39967538121985 |
| C | 4.22928277664741  | 13.15388579152472 | 9.24239525216438 |
| H | 5.10490301190194  | 13.19344315143783 | 9.90747133015168 |
| H | 3.55665941852733  | 12.35957407784698 | 9.59833832655696 |
| H | 3.69830352023759  | 14.11174715525223 | 9.30490459868685 |
| N | -3.01110178045192 | 13.34040615465684 | 4.95338037046976 |
| C | -3.73793085187740 | 12.58153079184371 | 4.01761682575207 |
| C | -4.01412172911432 | 13.08526365886975 | 2.72521837193588 |
| C | -4.80687965258083 | 12.30952081920161 | 1.87080951805541 |
| H | -5.03542383899748 | 12.68711531007711 | 0.87238779090196 |
| C | -5.30860377153545 | 11.07205950420226 | 2.26611523292757 |
| H | -5.92027575090084 | 10.48372988572561 | 1.58004362726691 |
| C | -5.02943969483678 | 10.59036789142904 | 3.54610470021767 |
| H | -5.42532855394842 | 9.62220569988830  | 3.85367915304800 |
| C | -4.25344557216466 | 11.33122309664486 | 4.44003039667331 |
| C | -3.51732683318901 | 14.44761412661842 | 2.26913855770292 |
| H | -2.83211821863407 | 14.83356745454231 | 3.03591274976921 |
| C | -4.68546771987775 | 15.44055038135142 | 2.15256047766908 |
| H | -5.40649331019133 | 15.11343786494000 | 1.38779340585888 |
| H | -4.32124919129184 | 16.43961665881845 | 1.86925065000835 |
| H | -5.22304178360138 | 15.52775076446886 | 3.10733181530640 |
| C | -2.72658317589035 | 14.35654203389498 | 0.95584471428696 |
| H | -1.89657619410640 | 13.64361532488651 | 1.05824826417048 |
| H | -2.30923817070886 | 15.33785497761522 | 0.68653318115156 |
| H | -3.36369999585845 | 14.02385024593869 | 0.12238567540203 |
| C | -3.89487014732923 | 10.81401451621313 | 5.82109341810389 |
| H | -3.76127806853271 | 11.70422268202095 | 6.45840316482614 |
| C | -2.54524899236485 | 10.07104487424164 | 5.78484848343793 |

|    |                   |                   |                   |
|----|-------------------|-------------------|-------------------|
| H  | -2.62015806182010 | 9.17482383717765  | 5.15031874585461  |
| H  | -2.24754660730827 | 9.75452359623087  | 6.79603482888259  |
| H  | -1.75063631119753 | 10.70573146376513 | 5.37072791249084  |
| C  | -4.98041462397377 | 9.93349170944876  | 6.44889529688883  |
| H  | -5.95757491961013 | 10.43728139093586 | 6.44903983801621  |
| H  | -4.71704207045873 | 9.69321421787246  | 7.48912755136912  |
| H  | -5.09064881921616 | 8.97797019449180  | 5.91426738380430  |
| N  | 2.19763845346798  | 12.13041541438860 | 2.98699269684894  |
| Si | 2.12619666713100  | 10.49048767379485 | 3.57097784868752  |
| Si | 2.46990758599563  | 12.65955631778420 | 1.34767632558938  |
| C  | 3.72412189311318  | 9.57239222322562  | 3.07140124695581  |
| H  | 4.02320038557644  | 9.81568800681744  | 2.04136760865897  |
| H  | 3.54897154969477  | 8.48616989135509  | 3.11118066456099  |
| H  | 4.59372092688667  | 9.75568730083139  | 3.72280785422992  |
| C  | 0.69188703348700  | 9.48937835038968  | 2.89253484446019  |
| H  | -0.26366433672234 | 9.98381982442416  | 3.11218690480130  |
| H  | 0.67804483279923  | 8.49139836377640  | 3.35636229555246  |
| H  | 0.76741639272873  | 9.35816250457514  | 1.80466078634698  |
| C  | 2.04175107440722  | 10.48704797864684 | 5.45608589715424  |
| H  | 2.81485677039165  | 11.10950086907017 | 5.93408722667308  |
| H  | 2.15451574931781  | 9.46290423767182  | 5.84556956608574  |
| H  | 1.07282857695717  | 10.87793416828329 | 5.79620529236400  |
| C  | 4.32184465650905  | 13.00934950365148 | 1.11140581612737  |
| H  | 4.65648475424998  | 13.84611812278725 | 1.74711706217126  |
| H  | 4.52761021533132  | 13.30478980076063 | 0.07121026437893  |
| H  | 4.94562925889911  | 12.12609603439088 | 1.31945584591459  |
| C  | 1.96460495419183  | 11.35250615117887 | 0.08852603937616  |
| H  | 2.50662112749851  | 10.40501751158062 | 0.21561304652365  |
| H  | 2.16330867114609  | 11.71572937154956 | -0.93194512881452 |
| H  | 0.88863874949411  | 11.14132667314896 | 0.16473909328526  |
| C  | 1.56008922334305  | 14.25302464685475 | 0.95132210063287  |
| H  | 0.47191699005646  | 14.12171597624734 | 1.02773664969147  |
| H  | 1.79725106356796  | 14.57652487402947 | -0.07531047970023 |
| H  | 1.84585982621253  | 15.06157458104605 | 1.63980739302383  |
| C  | 8.34473024785494  | 11.62927158829927 | 4.64390853733445  |
| C  | 8.36872539264289  | 12.64508571628345 | 3.68064416618495  |
| C  | 7.94241742852527  | 12.37871238334309 | 2.37445581381720  |
| C  | 7.48877085270943  | 11.09820233490363 | 2.03320497756000  |
| C  | 7.45785323506963  | 10.08545296590348 | 2.99861791685753  |
| C  | 7.88696623951435  | 10.35101195010509 | 4.30506829842843  |
| H  | 7.10108974519217  | 9.08994050282052  | 2.73242789260574  |
| H  | 7.15926175906922  | 10.88983314354052 | 1.01479262433901  |
| H  | 7.96006883190560  | 13.16809825302788 | 1.62171588974811  |
| H  | 8.71174450932804  | 13.64349546657833 | 3.95336782565737  |
| H  | 8.68490458059412  | 11.83631071111222 | 5.65810015113356  |
| H  | 7.87043916307372  | 9.55980719689472  | 5.05629052740270  |

Molecular coordinates used in the Mössbauer calculation of **9-crown**:

|    |                   |                   |                   |
|----|-------------------|-------------------|-------------------|
| Fe | 0.44347289948689  | 0.46908747892437  | 10.45963527681639 |
| S  | -1.28995009295694 | -0.91714177459028 | 10.45198307880649 |
| S  | 2.07782052335425  | 1.93236102234170  | 10.82943765386246 |
| C  | -0.51890753352605 | 1.41152161010163  | 11.92114414063293 |
| C  | -2.30446643592807 | -0.27197459950244 | 11.76378138893887 |
| C  | -1.76051971004648 | 0.94486771570523  | 12.39609478375167 |
| C  | -2.44782969445531 | 1.61756120286747  | 13.41738813247268 |
| H  | -3.40599092180353 | 1.21806908072340  | 13.75433735590795 |
| C  | -1.90713453244892 | 2.78306194247243  | 13.96760879245728 |
| H  | -2.44836293419711 | 3.31884752988079  | 14.74974389521689 |
| C  | -0.67770372252955 | 3.26754100910402  | 13.51247634115713 |
| H  | -0.23128908967112 | 4.17214745946669  | 13.92936327674527 |
| C  | 0.01557691475812  | 2.57511258585122  | 12.50749323773146 |
| C  | 1.35016871318422  | 3.00318394823831  | 12.05019571797612 |
| N  | -3.42651702567107 | -0.78041891021893 | 12.13677701855735 |
| C  | -3.95825949110669 | -1.94103666772258 | 11.54727960992429 |
| C  | -5.06614479774529 | -1.80660838884604 | 10.67953358410148 |
| C  | -5.64982216000045 | -2.96444921746011 | 10.15525486238499 |
| H  | -6.50092613070670 | -2.87468986948580 | 9.47851094755804  |
| C  | -5.16306327010446 | -4.22893026254907 | 10.48315482587214 |
| H  | -5.63022794621961 | -5.12179341629537 | 10.06515220372987 |
| C  | -4.07630336685165 | -4.34809509989481 | 11.35088219575250 |
| H  | -3.69796468023121 | -5.34023481565362 | 11.60057122489212 |
| C  | -3.45699458775513 | -3.22005259243980 | 11.89514116772736 |
| C  | -5.54977045126039 | -0.41615849148343 | 10.31103301070948 |
| H  | -5.33260746067422 | 0.22456673632307  | 11.18202138714746 |
| C  | -4.74288632322474 | 0.14160484005721  | 9.12411518168211  |
| H  | -3.66430804594090 | 0.12864368847166  | 9.33101995615222  |
| H  | -5.04209298927268 | 1.17727360145314  | 8.90166460747978  |
| H  | -4.91713608044771 | -0.46844237073139 | 8.22439057644440  |
| C  | -7.05391137254164 | -0.34742159914040 | 10.02929438566361 |
| H  | -7.32317698481866 | -0.88871057004630 | 9.10905449093846  |
| H  | -7.36620738767975 | 0.69805851793047  | 9.89119752864957  |
| H  | -7.63933481557385 | -0.77358661571973 | 10.85691619612801 |
| C  | -2.29543444930549 | -3.31863256728752 | 12.86697296874357 |
| H  | -1.58509625763922 | -2.53108530864971 | 12.57895828447827 |
| C  | -1.52578231196891 | -4.63949902912422 | 12.79381908241370 |
| H  | -2.12794446554351 | -5.48750626610772 | 13.15940494310192 |
| H  | -0.61819952868111 | -4.58161646766863 | 13.41326417071836 |
| H  | -1.21685456080409 | -4.86268996115817 | 11.76259784734346 |
| C  | -2.76665862992068 | -3.02071014120047 | 14.30075103405878 |
| H  | -3.33196729929675 | -2.07948261762486 | 14.33170597953565 |
| H  | -1.90335246102161 | -2.91387052037949 | 14.97478075532998 |
| H  | -3.41859350498796 | -3.82833540378012 | 14.67082838592448 |

|    |                   |                   |                   |
|----|-------------------|-------------------|-------------------|
| N  | 1.91746957066751  | 4.06336120942609  | 12.51295016510944 |
| C  | 3.21270400994080  | 4.42340593315206  | 12.10196764599859 |
| C  | 3.36189595357700  | 5.50706085445772  | 11.20279133752177 |
| C  | 4.65169980905062  | 5.90370923058350  | 10.84047765099588 |
| H  | 4.78123920917511  | 6.73110543303583  | 10.14139080981466 |
| C  | 5.77785801054372  | 5.26024850594139  | 11.35521952549704 |
| H  | 6.77711354857615  | 5.58360993601851  | 11.06008150628442 |
| C  | 5.61721415919240  | 4.20567909889159  | 12.25152461224446 |
| H  | 6.49986589217387  | 3.70746683537589  | 12.65873763749986 |
| C  | 4.34571633557197  | 3.76738639836052  | 12.63674628358414 |
| C  | 2.12114568280329  | 6.16492006545442  | 10.62597393940713 |
| H  | 1.33369705533320  | 6.05702435312609  | 11.39053649295316 |
| C  | 2.30074463954854  | 7.65833677165395  | 10.33276605677014 |
| H  | 2.67338365692053  | 8.20075389352663  | 11.21372347238597 |
| H  | 1.33901071315438  | 8.10280914204974  | 10.03746350940964 |
| H  | 3.00460884244354  | 7.83084624601982  | 9.50409425610958  |
| C  | 1.64245055742762  | 5.41456740273420  | 9.36911147476629  |
| H  | 2.39686905655419  | 5.48533448546362  | 8.56995379702767  |
| H  | 0.70186023852961  | 5.84491606736977  | 8.99347306233889  |
| H  | 1.47832609306132  | 4.34901078346278  | 9.57614132892307  |
| C  | 4.19638594469552  | 2.65122237868196  | 13.65597982901998 |
| H  | 3.13945991036509  | 2.35763028676802  | 13.67674782939695 |
| C  | 4.55737316157740  | 3.16145357500204  | 15.06014393271965 |
| H  | 5.61457978220793  | 3.46329262529061  | 15.11054623216560 |
| H  | 4.38691919511164  | 2.37996268485295  | 15.81688102073811 |
| H  | 3.94543656635237  | 4.03375435725669  | 15.32803169902311 |
| C  | 5.00367785649953  | 1.40205715817785  | 13.28493060376273 |
| H  | 4.71017561970412  | 1.03981823012847  | 12.29029063770707 |
| H  | 4.80994655016775  | 0.60013817659709  | 14.01414612358125 |
| H  | 6.08648698505061  | 1.60188057895903  | 13.27474372055252 |
| N  | 1.18461952364572  | -0.19351695237260 | 8.87704243543340  |
| Si | 0.83942746957966  | 0.77396269411752  | 7.46414805042162  |
| Si | 2.07187636496937  | -1.67600835461473 | 8.93523796316081  |
| C  | -0.58142040456038 | 1.96333693160270  | 7.78985205739467  |
| H  | -1.48141750776625 | 1.42905664819065  | 8.12521784411238  |
| H  | -0.82999636052007 | 2.51918109530310  | 6.87126615951167  |
| H  | -0.31437253944510 | 2.69273470451368  | 8.56759539962616  |
| C  | 2.36501287265565  | 1.77923966893943  | 7.00016942525255  |
| H  | 2.67429589797736  | 2.39746085103505  | 7.85582345499134  |
| H  | 2.15463778578458  | 2.44795297236343  | 6.15121252759690  |
| H  | 3.20974800100594  | 1.13127183193220  | 6.72642029491066  |
| C  | 0.35783873175959  | -0.35240078475609 | 6.02649396650768  |
| H  | 1.15007307538858  | -1.07862342294925 | 5.79272947646216  |
| H  | 0.16493050918220  | 0.23652671381879  | 5.11654003976392  |
| H  | -0.55630948667917 | -0.91493404045864 | 6.26691723486619  |
| C  | 2.71843115562949  | -1.98270227226653 | 10.68496923239384 |

|   |                   |                   |                   |
|---|-------------------|-------------------|-------------------|
| H | 3.22657908634833  | -1.08524381491037 | 11.06753153865906 |
| H | 3.43633769310413  | -2.81923273948122 | 10.67420906013657 |
| H | 1.89322851147629  | -2.22701548595639 | 11.36837982342979 |
| C | 3.58014544034882  | -1.62424887175810 | 7.79863790642976  |
| H | 3.29859830573330  | -1.47499555830490 | 6.74659079142209  |
| H | 4.14329277387161  | -2.56904240236665 | 7.86118858886889  |
| H | 4.25483502336520  | -0.80404388384691 | 8.08522904525081  |
| C | 0.98324254110613  | -3.13888758399785 | 8.45939340225386  |
| H | 0.09705683506311  | -3.17857958690069 | 9.10932544042216  |
| H | 1.52829564011612  | -4.09196615053955 | 8.55313286035593  |
| H | 0.63128028755966  | -3.05049831644081 | 7.42211289336650  |
| K | 2.45939727132347  | -2.87934137056749 | 16.33517093108631 |
| O | 4.09623824016136  | -3.83054239425863 | 14.21228996641636 |
| O | 4.77513543206526  | -1.45620055874195 | 15.56622676870299 |
| O | 3.67809360373638  | -0.96146142487821 | 18.15505235899966 |
| O | 1.07386788029608  | -1.97872794183918 | 18.63256144533220 |
| O | 0.35517163707966  | -4.45287527565484 | 17.41600012561222 |
| O | 1.56147979087734  | -5.03646781602689 | 14.82659663106234 |
| C | 4.83275974096638  | -2.78431229558679 | 13.57509839221071 |
| H | 4.14850635318221  | -2.08214827396036 | 13.06795487925867 |
| H | 5.51436046664386  | -3.20135235241149 | 12.80963994662410 |
| C | 5.65322349037988  | -2.07189495184181 | 14.62145308324701 |
| H | 6.32014609466227  | -2.78573516348268 | 15.14298831274236 |
| H | 6.27851798747344  | -1.30517806441092 | 14.12911311058285 |
| C | 5.48403091083295  | -0.74401660171925 | 16.57638947646435 |
| H | 6.15723488204444  | 0.00332231920385  | 16.11610394441779 |
| H | 6.09872360661212  | -1.44524235007082 | 17.17350548547590 |
| C | 4.49884781438109  | -0.01984488559071 | 17.45741022842916 |
| H | 5.05543767739610  | 0.61134113090991  | 18.17579915344256 |
| H | 3.86463593518234  | 0.64152304807232  | 16.84025195018723 |
| C | 2.72725108879442  | -0.29653989386458 | 18.98863867903571 |
| H | 2.12238102157097  | 0.40476004786133  | 18.38496622776001 |
| H | 3.24742273258942  | 0.28486431769146  | 19.77339476021404 |
| C | 1.82892335626840  | -1.31757432306840 | 19.64231624349567 |
| H | 2.42812549277247  | -2.05243392220771 | 20.21408794587822 |
| H | 1.15821195387282  | -0.79611018923347 | 20.35195978853858 |
| C | 0.08233167617100  | -2.85626420616445 | 19.16732741973598 |
| H | -0.67030319757970 | -2.27738277167357 | 19.73499520877428 |
| H | 0.54996108162334  | -3.58449814920475 | 19.85818272350031 |
| C | -0.59498082386011 | -3.58283776736285 | 18.03194401197595 |
| H | -1.44595913055351 | -4.16380413055125 | 18.43630306409154 |
| H | -0.98416700916643 | -2.86388591393179 | 17.28952052829793 |
| C | -0.24486714352455 | -5.24230617115900 | 16.38323704199270 |
| H | -0.81748469568163 | -4.59597305378557 | 15.69766412140839 |
| H | -0.94024629504050 | -5.97900351002251 | 16.82909044540753 |
| C | 0.82976583103933  | -5.97395307960029 | 15.61936115579845 |

|   |                   |                   |                   |
|---|-------------------|-------------------|-------------------|
| H | 1.51825592414927  | -6.48915381326236 | 16.31492765932536 |
| H | 0.35120637056952  | -6.72827264872664 | 14.96651252147799 |
| C | 2.57590664311811  | -5.67071316960001 | 14.05084941594204 |
| H | 2.11919741953178  | -6.37606778138829 | 13.33044028881246 |
| H | 3.25715306229389  | -6.23763229536592 | 14.71283725814640 |
| C | 3.34073052489461  | -4.61855883653464 | 13.28651521735644 |
| H | 4.01964358552337  | -5.11206841727210 | 12.56544730788919 |
| H | 2.64650899974202  | -3.97749323497309 | 12.71577875198638 |
| O | 0.27376803201027  | -1.60628533530588 | 15.29822649084507 |
| C | 0.73741993759546  | -1.45125572677772 | 13.93415492107988 |
| H | -0.11257360432484 | -1.21338098061060 | 13.27456758803145 |
| H | 1.16224047120439  | -2.41286581234394 | 13.61943796354816 |
| C | 1.72626840391124  | -0.28826064061313 | 13.98861649378945 |
| H | 1.77265634448151  | 0.24466664530422  | 13.03024221377926 |
| H | 2.73848426302609  | -0.64358774244332 | 14.22518043533850 |
| C | 1.17764348895847  | 0.59208100496101  | 15.13982919419359 |
| H | 1.95754640117954  | 0.79933954585584  | 15.88699149271708 |
| H | 0.80418543353366  | 1.55380952079123  | 14.77265359835096 |
| C | 0.03593407001989  | -0.25109728367508 | 15.73971347697860 |
| H | 0.01136257096884  | -0.26934951065570 | 16.83762410709664 |
| H | -0.94026534036475 | 0.08764919311393  | 15.35435809052748 |
| O | 3.70822941680608  | -5.14575366976803 | 17.36633816889007 |
| C | 5.12773822998220  | -5.25133105252602 | 17.14690138948530 |
| H | 5.42052650237918  | -6.31665166166260 | 17.17536520697012 |
| H | 5.32539989688688  | -4.85600428598511 | 16.14317697314432 |
| C | 5.79873032923296  | -4.46482176621867 | 18.29413959058788 |
| H | 6.18754427898612  | -3.49902992923334 | 17.94624790149977 |
| H | 6.64317218788116  | -5.02538522289082 | 18.71502062932671 |
| C | 4.65826281411397  | -4.26222472705458 | 19.32648835092571 |
| H | 4.95771145227773  | -4.52920069326889 | 20.34814943797846 |
| H | 4.33260465621090  | -3.21309477343580 | 19.32777429296500 |
| C | 3.53979382063798  | -5.16389138478970 | 18.79383529553617 |
| H | 3.64358537464209  | -6.20002747977705 | 19.16918382537095 |
| H | 2.52142590444489  | -4.81357110759879 | 19.00121430196192 |

Molecular coordinates used in the Mössbauer calculation of **10**:

|    |                   |                  |                   |
|----|-------------------|------------------|-------------------|
| Fe | 2.59954681324890  | 6.02258855282492 | 12.26147240965206 |
| S  | 1.58002877153884  | 4.60047011878844 | 10.91245840581635 |
| S  | 2.90382448596085  | 7.87299918533389 | 13.43097278878009 |
| C  | 1.30750793953065  | 5.51326410451047 | 13.59612956674110 |
| C  | 0.46148539040145  | 3.78756553058320 | 12.05786620740182 |
| C  | 0.48158999707063  | 4.38751262991279 | 13.40420357248672 |
| C  | -0.32327693976028 | 3.91068033602922 | 14.44944907543352 |
| H  | -0.95174366945789 | 3.03660231672029 | 14.27082395138335 |
| C  | -0.31783651194691 | 4.56659011142630 | 15.68387056706732 |
| H  | -0.94175881853374 | 4.19347294044491 | 16.49759745407513 |

|   |                   |                   |                   |
|---|-------------------|-------------------|-------------------|
| C | 0.45659433751424  | 5.71447993161067  | 15.87551374938269 |
| H | 0.44719381752949  | 6.25727191821898  | 16.82229402075599 |
| N | 3.67627378849661  | 6.83573771747887  | 10.64951512006920 |
| H | 3.37392047655289  | 6.47929244878168  | 9.73864766852569  |
| H | 4.66091860145515  | 6.58420433383787  | 10.77409825499683 |
| H | 3.62317799609795  | 7.85794716424135  | 10.62505101008891 |
| C | 1.25473487077625  | 6.19607452674931  | 14.82809556175162 |
| C | 2.03876011577478  | 7.43905316086901  | 14.94067334102968 |
| N | -0.30381252551336 | 2.80077706597374  | 11.76882699709024 |
| C | -0.42634309583419 | 2.27874968765746  | 10.47006489170317 |
| C | 0.07807052487474  | 0.97780565618244  | 10.22724900009758 |
| C | -0.10067514484567 | 0.41153650943207  | 8.96367010263425  |
| H | 0.29291201043698  | -0.58533968780024 | 8.76106021568447  |
| C | -0.77971809040480 | 1.10015667535112  | 7.95779809339973  |
| H | -0.91638250027670 | 0.64430075591984  | 6.97603071285274  |
| C | -1.29462930014182 | 2.36707831622561  | 8.21962726853365  |
| H | -1.84279471082478 | 2.89488655012155  | 7.43648927131658  |
| C | -1.13345741648326 | 2.98291344572428  | 9.46637571048730  |
| C | 0.84717834967478  | 0.27146588322593  | 11.32728471509929 |
| H | 0.43130441075386  | 0.64189317393140  | 12.27980395565116 |
| C | 2.32811190841763  | 0.68513625137862  | 11.27947406973033 |
| H | 2.79827597957710  | 0.31479060440151  | 10.35497220256367 |
| H | 2.88376920606861  | 0.27133171083936  | 12.13557266452511 |
| H | 2.42503777741723  | 1.77962568372572  | 11.28619341991018 |
| C | 0.70325601280520  | -1.25314574099114 | 11.30303461255438 |
| H | -0.35329849349446 | -1.55492354235819 | 11.30142751420642 |
| H | 1.18534785667961  | -1.69504917488878 | 12.18751869163716 |
| H | 1.18344649734438  | -1.69620709476655 | 10.41757198608930 |
| C | -1.77639044129116 | 4.33457249636217  | 9.72837607630410  |
| H | -1.44961744597858 | 4.68353919323556  | 10.71661987685383 |
| C | -3.30802323741415 | 4.20354276089571  | 9.77468459364549  |
| H | -3.61578819418437 | 3.46909617549238  | 10.53203484271757 |
| H | -3.77317775835057 | 5.16992277540796  | 10.02094391871439 |
| H | -3.70771261864675 | 3.87360193938494  | 8.80385349353810  |
| C | -1.33557810048188 | 5.39081984908558  | 8.70569954090400  |
| H | -0.24158135865957 | 5.49005075431939  | 8.70338775026121  |
| H | -1.66131736829606 | 5.12940772817639  | 7.68760125392565  |
| H | -1.77190052237035 | 6.37003854921962  | 8.95284173902640  |
| N | 2.07758034494041  | 8.12569808978057  | 16.02317873451619 |
| C | 2.81637860934062  | 9.32267560067720  | 16.10612908389232 |
| C | 4.13473221630970  | 9.28005969782790  | 16.61473525064158 |
| C | 4.82094447562124  | 10.48697543787672 | 16.78154412362904 |
| H | 5.83983686632972  | 10.47631541712344 | 17.16879836341596 |
| C | 4.22458749954508  | 11.70411753334061 | 16.45300845788134 |
| H | 4.77408691724533  | 12.63677052126361 | 16.58890239402258 |
| C | 2.92764304348839  | 11.72641104079314 | 15.94015562334601 |

|   |                   |                   |                   |
|---|-------------------|-------------------|-------------------|
| H | 2.47538789563204  | 12.68158790948906 | 15.67216972781805 |
| C | 2.20071093164263  | 10.54591878832847 | 15.75409719640572 |
| C | 4.74511405959441  | 7.93888892999860  | 16.98419341588320 |
| H | 4.39127107389276  | 7.21486008075994  | 16.23336499588819 |
| C | 4.21857553386917  | 7.46823592821636  | 18.35188884277281 |
| H | 4.54017477740793  | 8.16143461131822  | 19.14347368570956 |
| H | 4.60219957214385  | 6.46543796642424  | 18.59591209604910 |
| H | 3.12090434478417  | 7.43060077100660  | 18.34968115808984 |
| C | 6.27466979046625  | 7.92119434853698  | 16.94659890704872 |
| H | 6.65938931343866  | 8.26306980415522  | 15.97489396823600 |
| H | 6.64399706591800  | 6.89995652022580  | 17.12483321768445 |
| H | 6.71176489407443  | 8.56084083180499  | 17.72793597776876 |
| C | 0.77703788162285  | 10.54134097780652 | 15.22224026735358 |
| H | 0.68461114601876  | 9.66750655207858  | 14.55806278559129 |
| C | -0.22298706948797 | 10.35051145369785 | 16.37593019353996 |
| H | 0.00441320141591  | 9.43977847070311  | 16.94696283252773 |
| H | -1.25089089807679 | 10.26971426755248 | 15.99183528628193 |
| H | -0.18035756543281 | 11.20775499537277 | 17.06583982263466 |
| C | 0.42517021956107  | 11.77872425917772 | 14.39251101875805 |
| H | 0.39760220701010  | 12.68975888512753 | 15.00891875387059 |
| H | -0.57148352090037 | 11.65836317690333 | 13.94411876129684 |
| H | 1.14915577702635  | 11.93728483924030 | 13.58103638409778 |
| O | 4.27117937953545  | 4.86558884971864  | 12.94773736422086 |
| C | 4.22035527913199  | 3.41595899307112  | 12.77140408925892 |
| H | 4.26497670461295  | 3.22427434023818  | 11.69441193795287 |
| H | 3.26050926175273  | 3.04255755170218  | 13.16078452383291 |
| C | 5.40110825694796  | 2.91225288409810  | 13.57985488244661 |
| H | 5.31558756640683  | 1.84477962733947  | 13.81897260126885 |
| H | 6.33794775304392  | 3.06952329809281  | 13.02463856869576 |
| C | 5.33907539855030  | 3.81267603666849  | 14.82498121135729 |
| H | 6.31138632172823  | 3.92469761673793  | 15.32012163784169 |
| H | 4.63275308921677  | 3.39750277187874  | 15.55710132344531 |
| C | 4.81421115895207  | 5.14870100260592  | 14.28727005889622 |
| H | 4.01018598587375  | 5.56730412634069  | 14.90312656248995 |
| H | 5.58950037899744  | 5.91324795967164  | 14.15181354254386 |

Molecular coordinates used in the IR frequency calculation of tricarbonyl complex **11** at the BP86/ZORA-def2-TZVP level of theory:

|    |              |             |              |
|----|--------------|-------------|--------------|
| Fe | 2.521309967  | 6.202905178 | 12.067408880 |
| S  | 1.640786804  | 4.441192943 | 10.861765949 |
| S  | 3.155268370  | 7.856167923 | 13.554743078 |
| C  | 1.284141256  | 5.599140897 | 13.526639524 |
| C  | 0.452429791  | 3.823664480 | 12.012398111 |
| C  | 0.435904178  | 4.499104374 | 13.325165325 |
| C  | -0.423222418 | 4.074443794 | 14.351975659 |
| H  | -1.072383158 | 3.218561275 | 14.158577117 |



|   |              |              |              |
|---|--------------|--------------|--------------|
| C | -0.433414149 | 4.744759502  | 15.576397416 |
| H | -1.096915059 | 4.409194993  | 16.375977388 |
| C | 0.396541063  | 5.848936301  | 15.778247015 |
| H | 0.400185222  | 6.399505453  | 16.720761543 |
| C | 1.253685851  | 6.280816570  | 14.753577595 |
| C | 2.119921695  | 7.463236569  | 14.926382721 |
| N | -0.365209060 | 2.852877625  | 11.762750181 |
| C | -0.443614012 | 2.245346398  | 10.503356511 |
| C | 0.037039886  | 0.918571038  | 10.361082221 |
| C | -0.122113769 | 0.268231014  | 9.135153366  |
| H | 0.249760564  | -0.750995055 | 9.015923205  |
| C | -0.747332804 | 0.900461365  | 8.058873122  |
| H | -0.863152529 | 0.379348968  | 7.106378350  |
| C | -1.228883662 | 2.199311412  | 8.213447214  |
| H | -1.724036235 | 2.692371982  | 7.373152546  |
| C | -1.089571890 | 2.892587099  | 9.420422342  |
| C | 0.745746706  | 0.270587516  | 11.535609227 |
| H | 0.284745158  | 0.698760888  | 12.441878258 |
| C | 2.233383395  | 0.665040343  | 11.552983099 |
| H | 2.745595086  | 0.258190171  | 10.666202061 |
| H | 2.734764989  | 0.269014258  | 12.450153737 |
| H | 2.356113028  | 1.756954064  | 11.538024410 |
| C | 0.585604356  | -1.252424524 | 11.587818800 |
| H | -0.472816407 | -1.547331531 | 11.543723976 |
| H | 1.014693554  | -1.646923208 | 12.521412231 |
| H | 1.110028421  | -1.748979870 | 10.756465669 |
| C | -1.669125102 | 4.289618088  | 9.564960730  |
| H | -1.360350013 | 4.677994187  | 10.543683936 |
| C | -1.124874711 | 5.250917271  | 8.500290784  |
| H | -0.027947194 | 5.283544112  | 8.543225789  |
| H | -1.426162252 | 4.942014783  | 7.486654708  |
| H | -1.505536310 | 6.269238554  | 8.669054305  |
| N | 2.085759577  | 8.151961548  | 16.021438535 |
| C | 2.860852663  | 9.310734474  | 16.178587478 |
| C | 4.129283232  | 9.225880708  | 16.801146978 |
| C | 4.831078301  | 10.408573105 | 17.055190172 |
| H | 5.813290699  | 10.360564120 | 17.527254190 |
| C | 4.303933027  | 11.650258238 | 16.697839290 |
| H | 4.867182639  | 12.563339042 | 16.899783754 |
| C | 3.063464730  | 11.718792913 | 16.061679672 |
| H | 2.667451192  | 12.690461207 | 15.763375257 |
| C | 2.327579921  | 10.562647176 | 15.785055242 |
| C | 4.668336534  | 7.856451064  | 17.179758153 |
| H | 4.379012441  | 7.169681944  | 16.367922826 |
| C | 3.994592416  | 7.354119917  | 18.469635783 |
| H | 4.258555862  | 8.006411582  | 19.316818700 |

|   |              |              |              |
|---|--------------|--------------|--------------|
| H | 4.319796348  | 6.329291988  | 18.707714208 |
| H | 2.902463678  | 7.354843071  | 18.354710547 |
| C | 6.192795751  | 7.804452451  | 17.300504260 |
| H | 6.679613243  | 8.175422799  | 16.387290675 |
| H | 6.522270031  | 6.767897086  | 17.465899917 |
| H | 6.557669464  | 8.403102237  | 18.150446152 |
| C | 0.974268923  | 10.602064631 | 15.094795118 |
| H | 0.949105576  | 9.743648636  | 14.404905213 |
| C | -0.155781228 | 10.406270587 | 16.120355428 |
| H | -0.003738378 | 9.474918603  | 16.681973357 |
| H | -1.135187700 | 10.353790031 | 15.619969071 |
| H | -0.175954614 | 11.246466130 | 16.833279293 |
| C | 0.743445844  | 11.862101120 | 14.257399486 |
| H | 0.666197206  | 12.763545164 | 14.885652377 |
| H | -0.198413308 | 11.770869946 | 13.696766806 |
| H | 1.557603252  | 12.019258612 | 13.535513679 |
| C | 3.611369739  | 6.743073043  | 10.773411012 |
| C | 1.115096974  | 7.198968759  | 11.587208186 |
| C | 3.666513589  | 5.077046630  | 12.857935808 |
| O | 4.364899062  | 4.340505262  | 13.407221634 |
| O | 4.321075896  | 7.098682809  | 9.926708687  |
| O | 0.176915211  | 7.817553749  | 11.322415616 |
| C | -3.205583320 | 4.245392300  | 9.551799109  |
| H | -3.584593021 | 3.873088114  | 8.586909605  |
| H | -3.583851925 | 3.580605274  | 10.341364621 |
| H | -3.625658133 | 5.249906728  | 9.715466004  |

Molecular coordinates used in the IR frequency calculation of the dicarbonyl analogue of **11** at the BP86/ZORA-def2-TZVP level of theory:

|    |              |             |              |
|----|--------------|-------------|--------------|
| Fe | 2.636701533  | 6.029971459 | 12.215078703 |
| S  | 1.541427846  | 4.620107302 | 10.902779912 |
| S  | 3.036586775  | 7.806683214 | 13.481138953 |
| C  | 1.318697383  | 5.527778837 | 13.596878990 |
| C  | 0.414605292  | 3.855965148 | 12.046304487 |
| C  | 0.420602926  | 4.466217897 | 13.385709597 |
| C  | -0.486143685 | 4.079458396 | 14.384913965 |
| H  | -1.170119003 | 3.254214727 | 14.176392596 |
| C  | -0.507908799 | 4.759517449 | 15.605355134 |
| H  | -1.206992013 | 4.455518116 | 16.387214186 |
| C  | 0.342927190  | 5.847996544 | 15.814960898 |
| H  | 0.314866810  | 6.423778290 | 16.742409944 |
| C  | 1.247001229  | 6.231319741 | 14.812923319 |
| C  | 2.086827665  | 7.433955020 | 14.934392777 |
| N  | -0.375704329 | 2.877909376 | 11.754597853 |
| C  | -0.464327599 | 2.335881040 | 10.466239243 |
| C  | 0.083610796  | 1.046719439 | 10.243325314 |

|   |              |              |              |
|---|--------------|--------------|--------------|
| C | -0.076610744 | 0.453210101  | 8.989660549  |
| H | 0.349009130  | -0.534612307 | 8.804633200  |
| C | -0.770862353 | 1.102544558  | 7.966936956  |
| H | -0.886604148 | 0.625534417  | 6.991732494  |
| C | -1.318115965 | 2.361744677  | 8.202865190  |
| H | -1.866147362 | 2.867571940  | 7.404222645  |
| C | -1.178481343 | 3.000394744  | 9.440208516  |
| C | 0.867284707  | 0.383643664  | 11.360176306 |
| H | 0.420053793  | 0.745032725  | 12.301845977 |
| C | 2.333516694  | 0.850818829  | 11.342822506 |
| H | 2.830241073  | 0.510334808  | 10.419953191 |
| H | 2.886183446  | 0.440198763  | 12.201937549 |
| H | 2.406634871  | 1.946745545  | 11.374463220 |
| C | 0.783012775  | -1.146288548 | 11.345378832 |
| H | -0.260832365 | -1.491925035 | 11.327487159 |
| H | 1.268376596  | -1.560827363 | 12.241788135 |
| H | 1.297213187  | -1.576014283 | 10.471524385 |
| C | -1.828141463 | 4.353627167  | 9.674006550  |
| H | -1.523937818 | 4.703345395  | 10.669052288 |
| C | -1.353081491 | 5.400818790  | 8.657740364  |
| H | -0.259939712 | 5.499658461  | 8.694434195  |
| H | -1.644487323 | 5.127535002  | 7.631300476  |
| H | -1.795528143 | 6.383587308  | 8.881163782  |
| N | 2.071751274  | 8.164031205  | 15.999033319 |
| C | 2.819873006  | 9.345847882  | 16.101640402 |
| C | 4.119334742  | 9.302606961  | 16.661982730 |
| C | 4.794851260  | 10.508608411 | 16.872327446 |
| H | 5.799783766  | 10.493232701 | 17.295548661 |
| C | 4.213065739  | 11.731049054 | 16.533406223 |
| H | 4.757422432  | 12.662368810 | 16.700769213 |
| C | 2.941615760  | 11.756966478 | 15.958901129 |
| H | 2.502613307  | 12.713783920 | 15.672764829 |
| C | 2.228413509  | 10.576487084 | 15.728015519 |
| C | 4.720463438  | 7.954496994  | 17.022267948 |
| H | 4.422228112  | 7.253143969  | 16.226579488 |
| C | 4.120241313  | 7.436017181  | 18.341850905 |
| H | 4.400207455  | 8.099601871  | 19.175098235 |
| H | 4.488808554  | 6.423169517  | 18.566866991 |
| H | 3.024486751  | 7.400698946  | 18.276008985 |
| C | 6.249494641  | 7.953794072  | 17.077451274 |
| H | 6.685061309  | 8.328169528  | 16.140050703 |
| H | 6.617511397  | 6.929722577  | 17.238690453 |
| H | 6.631374086  | 8.572914403  | 17.904928195 |
| C | 0.840049604  | 10.568564659 | 15.109632772 |
| H | 0.800203483  | 9.699144960  | 14.434260349 |
| C | -0.230044803 | 10.360406844 | 16.195340623 |

|   |              |              |              |
|---|--------------|--------------|--------------|
| H | -0.028127596 | 9.442987603  | 16.764416690 |
| H | -1.232181514 | 10.276437769 | 15.747286139 |
| H | -0.234607543 | 11.211356249 | 16.895631462 |
| C | 0.531408053  | 11.810331178 | 14.269490156 |
| H | 0.461018258  | 12.717195221 | 14.890375329 |
| H | -0.435148704 | 11.686906850 | 13.758832695 |
| H | 1.303048689  | 11.979659457 | 13.505201631 |
| C | -3.360609538 | 4.229497771  | 9.679138568  |
| H | -3.736032088 | 3.894849095  | 8.699342669  |
| H | -3.691028917 | 3.500883095  | 10.432979090 |
| H | -3.829146961 | 5.199547184  | 9.906915807  |
| C | 3.745735665  | 6.554891122  | 10.919905162 |
| C | 3.728373684  | 4.956209396  | 12.928299467 |
| O | 4.465594549  | 4.211603054  | 13.441229504 |
| O | 4.501077770  | 6.866345577  | 10.092988904 |

## References

1. Borger, J. E.; Ehlers, A. W.; Lutz, M.; Slootweg, J. C.; Lammertsma, K. Stabilization and Transfer of the Transient  $[\text{Mes}^*\text{P}_4]^-$  Butterfly Anion Using  $\text{BPh}_3$ . *Angew. Chem. Int. Ed.* **2016**, *55*, 613-617.
2. Bhattacharya, P.; Krause, J. A.; Guan, H. Iron Hydride Complexes Bearing Phosphinite-Based Pincer Ligands: Synthesis, Reactivity, and Catalytic Application in Hydrosilylation Reactions. *Organometallics* **2011**, *30*, 4720-4729.
3. Mallow, O.; Khanfar, M. A.; Malischewski, M.; Finke, P.; Hesse, M.; Lork, E.; Augenstein, T.; Breher, F.; Harmer, J. R.; Vasilieva, N. V.; Zibarev, A.; Bogomyakov, A. S.; Seppelt, K.; Beckmann, J. Diaryldichalcogenide radical cations. *Chem. Sci.* **2015**, *6*, 497-504.
4. Fulmer, G. R.; Miller, A. J. M.; Sherden, N. H.; Gottlieb, H. E.; Nudelman, A.; Stoltz, B. M.; Bercaw, J. E.; Goldberg, K. I. NMR Chemical Shifts of Trace Impurities: Common Laboratory Solvents, Organics, and Gases in Deuterated Solvents Relevant to the Organometallic Chemist. *Organometallics* **2010**, *29*, 2176-2179.
5. Harris, R. K.; Becker, E. D.; Cabral de Menezes, S. M.; Goodfellow, R.; Granger, P. NMR nomenclature. Nuclear spin properties and conventions for chemical shifts (IUPAC Recommendations 2001). *Pure Appl. Chem.* **2001**, *73*, 1795-1818.
6. Harris, R. K.; Becker, E. D.; Cabral de Menezes, S. M.; Granger, P.; Hoffman, R. E.; Zilm, K. W. Further conventions for NMR shielding and chemical shifts (IUPAC Recommendations 2008). *Pure Appl. Chem.* **2008**, *80*, 59-84.
7. Stoll, S.; Schweiger, A. EasySpin, a comprehensive software package for spectral simulation and analysis in EPR. *J. Magn. Reson.* **2006**, *178*, 42-55.
8. Aranzaes, J. R.; Daniel, M.-C.; Astruc, D. Metallocenes as references for the determination of redox potentials by cyclic voltammetry—Permethylated iron and cobalt sandwich complexes, inhibition by polyamine dendrimers, and the role of hydroxy-containing ferrocenes. *Can. J. Chem.* **2006**, *84*, 288-299.
9. Bisson, A. P.; Hunter, C. A.; Morales, J. C.; Young, K. Cooperative Interactions in a Ternary Mixture. *Chem. Eur. J.* **1998**, *4*, 845-851.
10. Reich, H. J. WinDNMR: Dynamic NMR Spectra for Windows. *J. Chem. Educ.* **1995**, *72*, 1086.
11. Sheldrick, G. A short history of SHELX. *Acta Cryst.* **2008**, *64*, 112-122.
